# Supplementary material for: Influence of steric hindrance on the 1,4- versus 1,6-Michael addition: synthesis of furans and pentasubstituted benzenes
Source: Royal Society of Chemistry journal article supplement (doi:10.1039/d4ob00686k), 2024-01-01
Supplement: d4ob00686k1.pdf [file d4ob00686k1.pdf]

## Supporting Information

# Influence of steric hindrance on 1,4- versus 1,6-Michael addition: Synthesis of furans and pentasubstituted benzenes

Shally Rana,<sup>[a,c]</sup> Ranjay Shaw<sup>[b]</sup>, and Ramendra Pratap<sup>\*[a]</sup>

[a] Dr. S. Rana and Dr. R. Pratap

Department of Chemistry, University of Delhi, North Campus, Delhi, India, Pin-110007

[b] Dr. Ranjay Shaw

Department of Chemistry, GLA University, Mathura, India, 281406

[c] Dr. S. Rana

Department of Chemistry, School of Science Indrashil University, Rajpur, Kadi, Ahmedabad-Mehsana Highway Gujarat, 382740.

### Table of Contents:

| SN | Content                                                              | Page no |
|----|----------------------------------------------------------------------|---------|
| 1  | X-ray crystallography data of 4d and 5b                              | S2-S4   |
| 2  | <sup>1</sup> H NMR and <sup>13</sup> C NMR Spectra of 4a-4k          | S5-S15  |
| 3  | <sup>1</sup> H NMR and <sup>13</sup> C NMR Spectra of 5a-5c          | S16-S18 |
| 4  | <sup>1</sup> H NMR and <sup>13</sup> C NMR Spectra of 7a-7k          | S19-S29 |
| 5  | <sup>1</sup> H NMR and <sup>13</sup> C NMR Spectra of 9a-9j          | S30-S39 |
| 6  | <sup>1</sup> H NMR and <sup>13</sup> C NMR Spectra of 11 and 12a-12e | S40-S45 |

**Crystal data for (4d) and (5b):** To a 5 ml glass vial 25-30 mg of 2-(bis(methylthio)methyl)-3-(3,4-dimethoxyphenyl)-5-methylfuran (**4d**) or 4-acetyl-3-amino-2'-chloro-5-(methylthio)-[1,1'-biphenyl]-2-carbonitrile (**5b**) was completely dissolved in DCM followed by addition of 1-2 drops of hexanes. Further, solution was kept for slow evaporation at room temperature until yellow rod shaped type suitable crystal obtained for X-ray analysis.

A white crystal was mounted on a capillary tube for indexing and intensity data collection at 302 and 293 K respectively on an Oxford Xcalibur Sapphire3 CCD single-crystal diffractometer (MoK $\alpha$  radiation,  $\lambda = 0.71073 \text{ \AA}$ ).<sup>1</sup> Routine Lorentz and polarization corrections were applied, and an absorption correction was performed using the ABSCALE 3 program [CrysAlis Pro software system, Version 171.34; Oxford Diffraction Ltd., Oxford, U.K., 2011]. Data reduction was performed with the CrysAllis-PRO.<sup>1</sup> The structure was solved by direct methods using SIR-92 program<sup>2</sup> and refined on F2 using all data by full matrix least-squares procedures with SHELXL-2016/6 incorporated in WINGX 1.8.05 crystallographic collective package.<sup>3</sup> The hydrogen atoms were placed at the calculated positions and included in the last cycles of the refinement. All calculations were done using the WinGX software package.<sup>4-5</sup> Crystallographic data collection and structure solution parameters are summarized in **Table S1**. This data can be obtained free of charge from The Cambridge Crystallographic Data Center via [www.ccdc.cam.uk/data\\_request/cif](http://www.ccdc.cam.uk/data_request/cif).

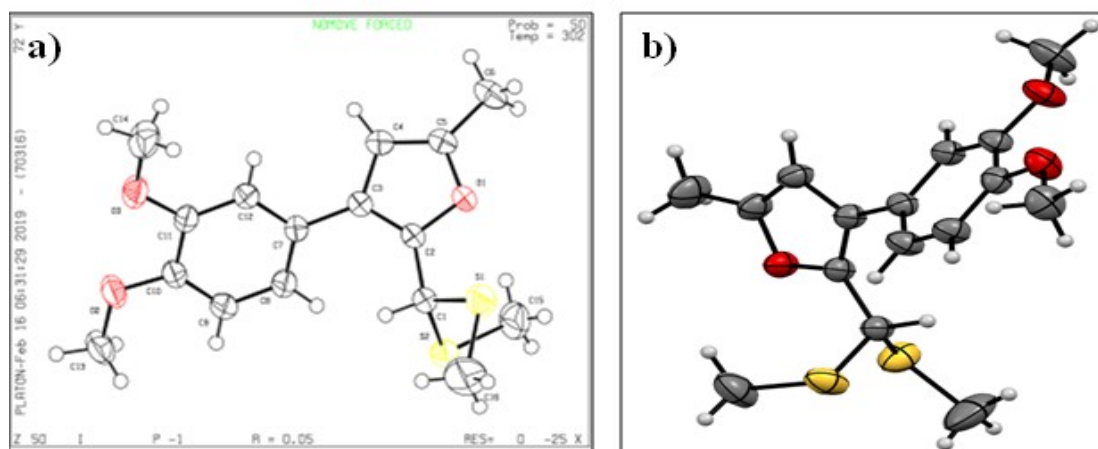

**Figure S1.** ORTEP diagram of **4d**; thermal ellipsoids are drawn at the 50% probability level

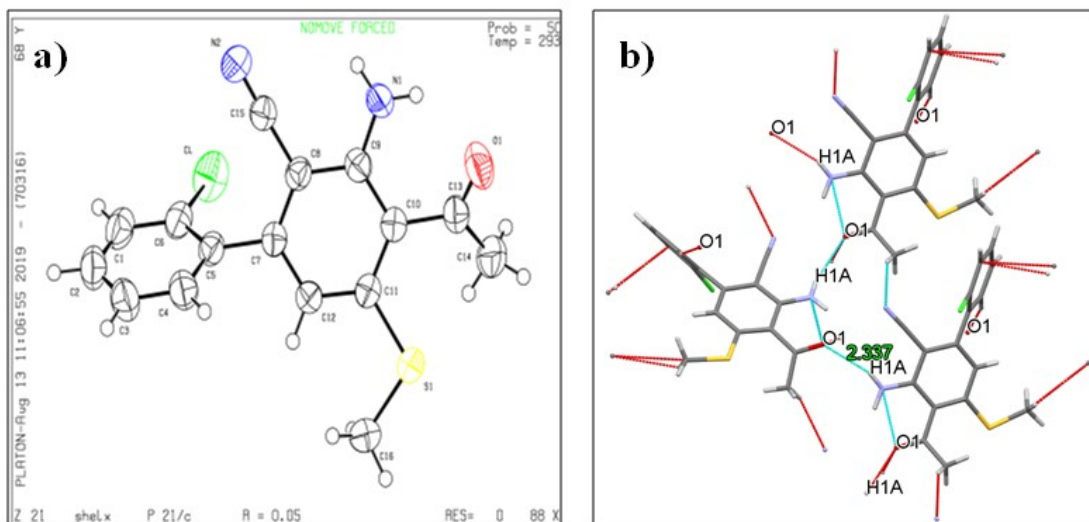

**Figure S2:** (a) ORTEP diagram of **5b**; thermal ellipsoids are drawn at the 50% probability level. (b) **5b** showing intermolecular C-H...N≡C interaction.

**TableS1:** Crystal data and structure refinement for **4d** and **5b**

|                                                    | <b>4d</b>            | <b>5b</b>             |
|----------------------------------------------------|----------------------|-----------------------|
| <b>CCDC No.</b>                                    | <b>1974747</b>       | <b>1974746</b>        |
| <b>Empirical formula</b>                           | $C_{16}H_{20}O_3S_2$ | $C_{16}H_{13}ClN_2OS$ |
| <b>Formula weight</b>                              | 324.44               | 316.79                |
| <b>Temperature/k</b>                               | 302                  | 293                   |
| <b>Crystal system</b>                              | Triclinic            | Monoclinic            |
| <b>Space group</b>                                 | P -1                 | P21/c                 |
| <b>a/Å</b>                                         | 7.4509(5)            | 10.9847(6) Å          |
| <b>b/Å</b>                                         | 8.5535(6)            | 9.3266(4) Å           |
| <b>c/Å</b>                                         | 13.4726(9)           | 15.3230(8) Å          |
| <b><math>\alpha</math>/°</b>                       | 87.055(2)            | 90°.                  |
| <b><math>\beta</math>/°</b>                        | 83.603(2)            | 107.140(6)°           |
| <b><math>\gamma</math>/°</b>                       | 79.582(2)            | 90°.                  |
| <b>Volume/Å<sup>3</sup></b>                        | 838.79(10)           | 1500.12(14)           |
| <b>Z</b>                                           | 2                    | 4                     |
| <b><math>\rho_{\text{calc}}/\text{cm}^3</math></b> | 1.285                | 1.403                 |
| <b><math>\mu/\text{mm}^{-1}</math></b>             | 0.324                | 0.393                 |
| <b>F(000)</b>                                      | 344                  | 656                   |
| <b>Crystal size/mm<sup>3</sup></b>                 | 0.43 x 0.28 x 0.12   | 0.22 x 0.20 x 0.18    |

|                                                         |                                                   |                                    |
|---------------------------------------------------------|---------------------------------------------------|------------------------------------|
| <b>2<math>\theta</math> range for data collection/°</b> | 2.422 to 28.302                                   | 3.474 to 25.000°                   |
| <b>Index ranges</b>                                     | -9<=h<=9, -11<=k<=11, -17<=l<=17                  | -13<=h<=13, -11<=k<=11, -18<=l<=18 |
| <b>Reflections collected</b>                            | 11608                                             | 18167                              |
| <b>Independent reflections</b>                          | 4093 [R(int) = 0.0868]                            | 2626 [R(int) = 0.0420]             |
| <b>Data/restraints/parameters</b>                       | 4093 /0/195                                       | 2626 / 0 / 190                     |
| <b>Goodness-of-fit on F<sup>2</sup></b>                 | 1.125                                             | 1.004                              |
| <b>Final R indexes [<math>I \geq 2\sigma(I)</math>]</b> | R <sub>1</sub> = 0.0458, wR <sub>2</sub> = 0.1361 | R1 = 0.0454, wR2 = 0.1035          |
| <b>Final R indexes [all data]</b>                       | R <sub>1</sub> = 0.0514, wR <sub>2</sub> = 0.1407 | R1 = 0.0614, wR2 = 0.1109          |
| <b>Largest diff. peak/hole / e Å<sup>-3</sup></b>       | 0.251 and -0.284 e.Å <sup>-3</sup>                | 0.187 and -0.239e.Å <sup>-3</sup>  |

## References

- (1) CrysAlisPro, v. 1.171.33.49b, Oxford Diffraction Ltd., **2009**.
- (2) Altomare, A.; Cascarano, G.; Giacovazzo, C.; Guagliardi, A. *J. Appl. Cryst.* **1993**, 26, 343.
- (3) Sheldrick, G. M. SHELXL-2014/7: Program for the solution of crystal structures, University of Gottingen, Gottingen, Germany, **2014**.
- (4) Sheldrick, G. M. *Acta Crystallogr., Sect. A: Found. Crystallogr.*, **2008**, 64, 112.
- (5) Farrugia, L. J. WinGX, v. 1.70, An Integrated System of Windows Programs for the Solution, Refinement and Analysis of Single-Crystal X-ray Diffraction Data, Department of Chemistry, University of Glasgow, **2003**.

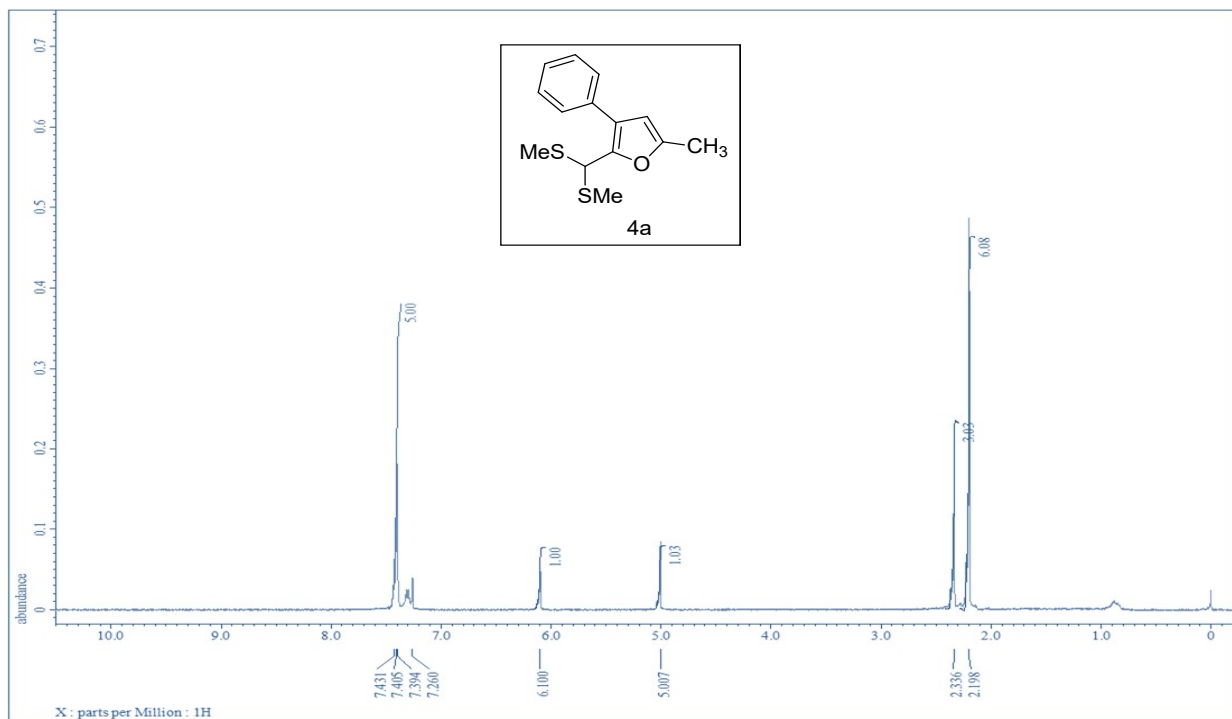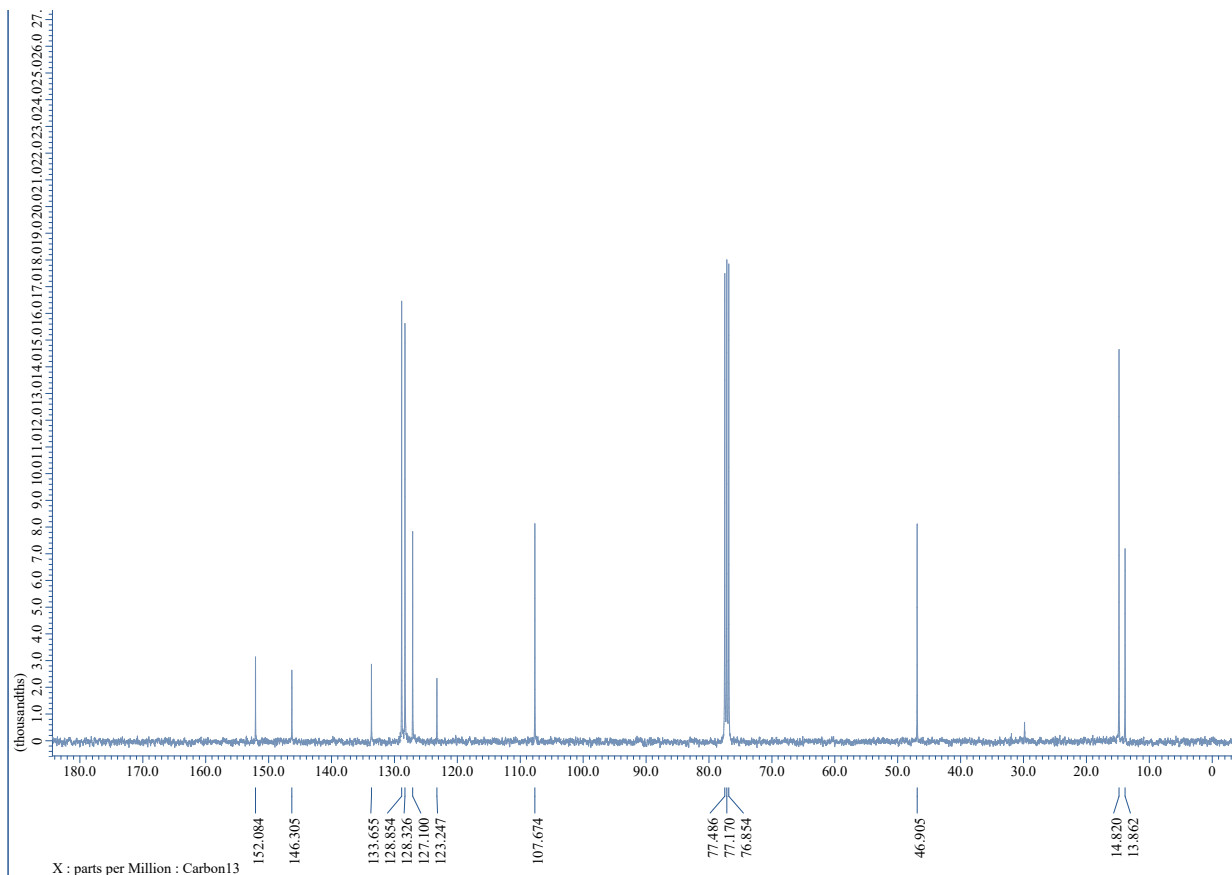

**<sup>1</sup>H NMR and <sup>13</sup>C NMR spectra of 2-(bis(methylthio)methyl)-5-methyl-3-phenylfuran (4a)**

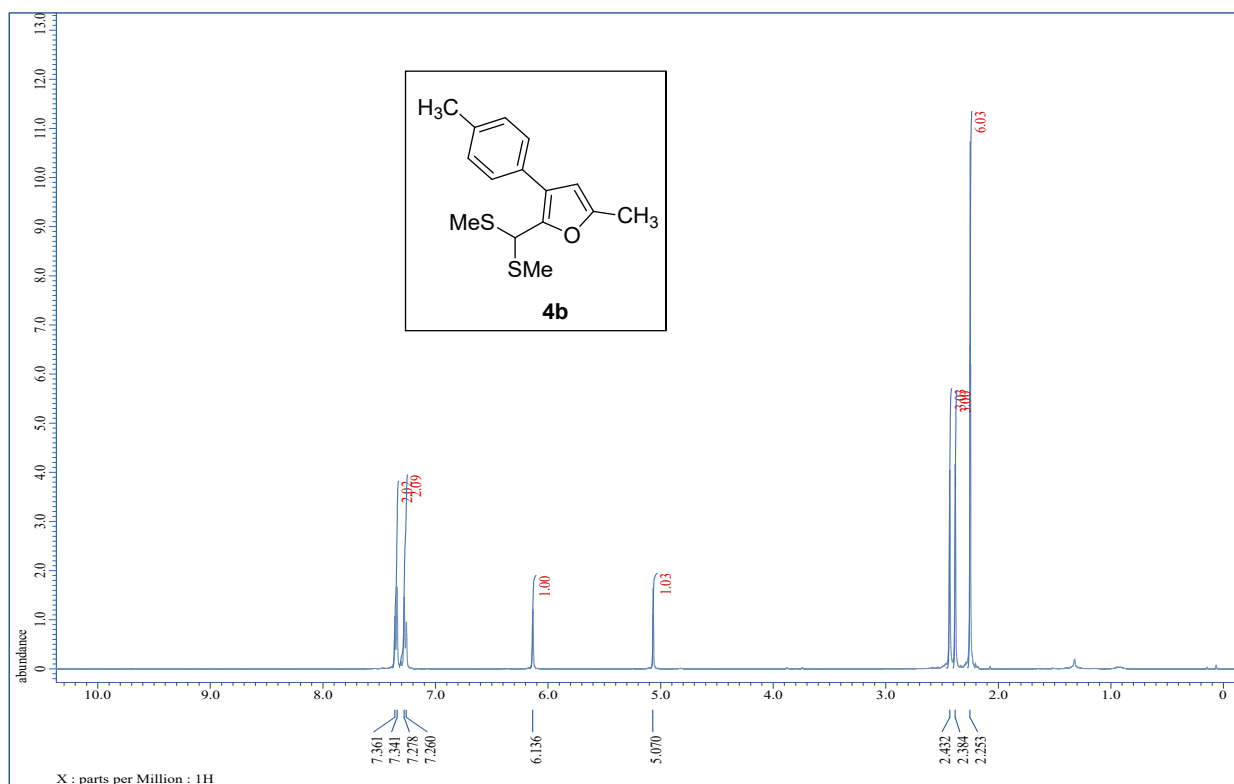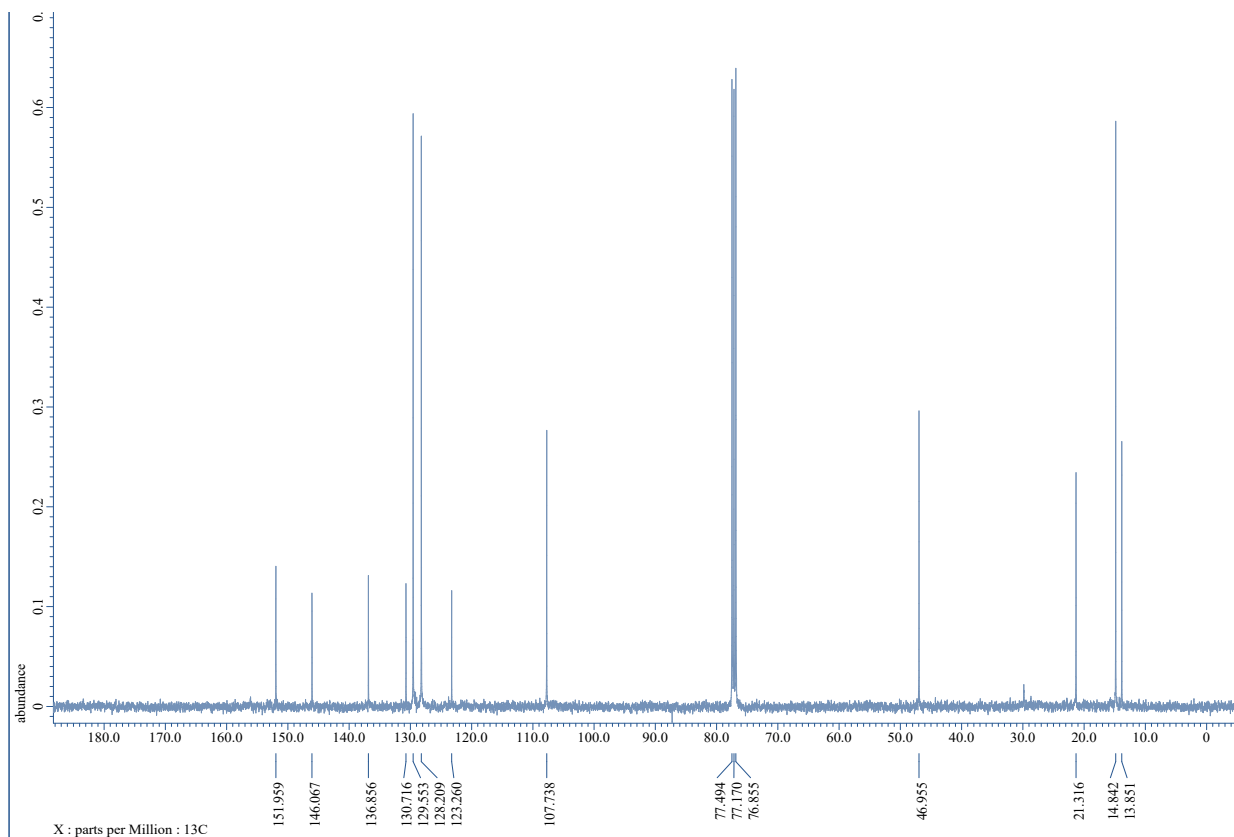

**<sup>1</sup>H NMR and <sup>13</sup>C NMR Spectra of 2-(bis(methylthio)methyl)-5-methyl-3-(*p*-tolyl)furan (4b)**

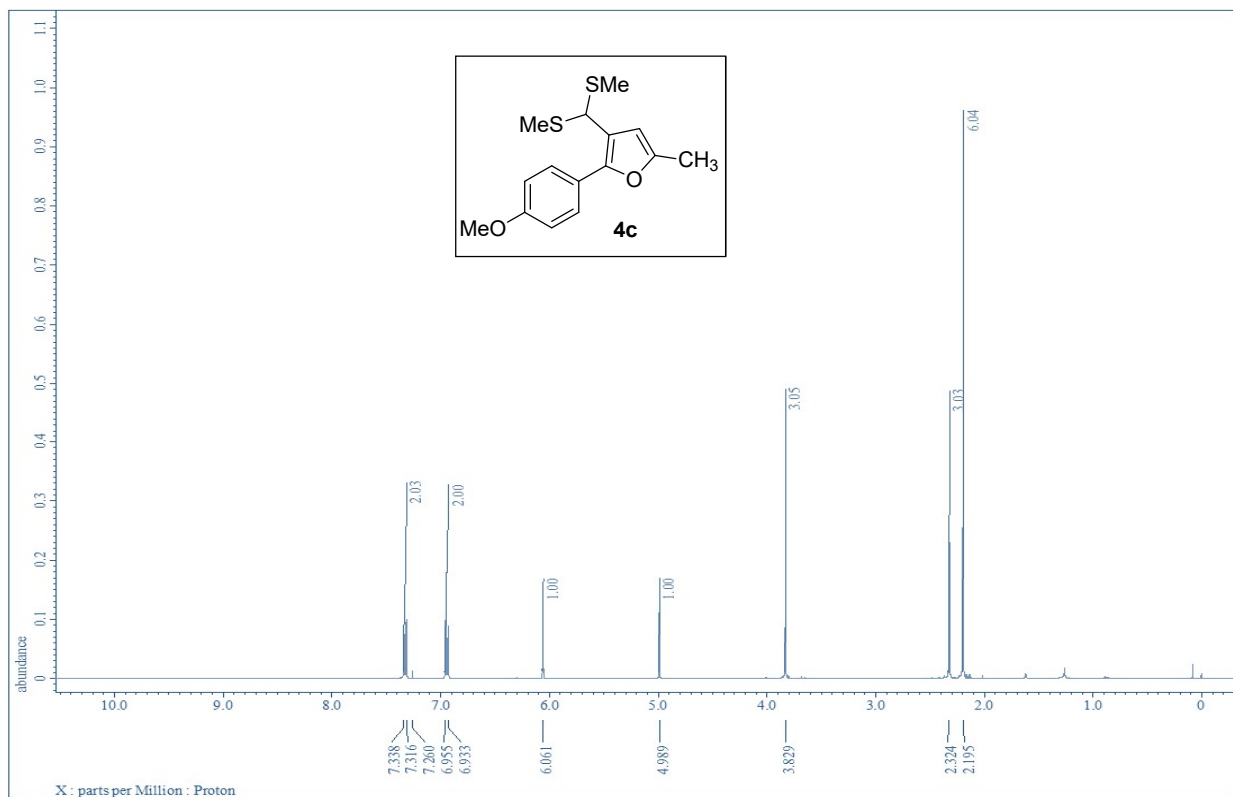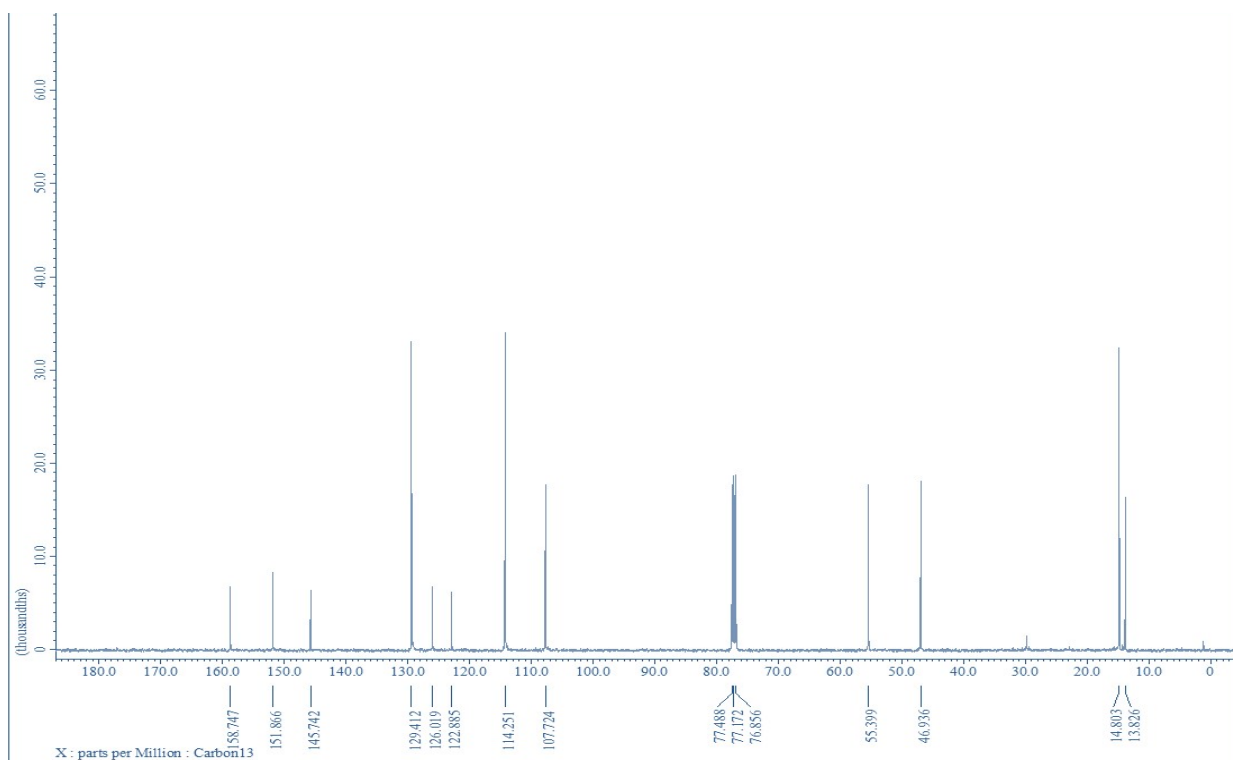

**<sup>1</sup>H NMR and <sup>13</sup>C NMR spectra of 3-(bis(methylthio)methyl)-2-(4-methoxyphenyl)-5-methylfuran(4c)**

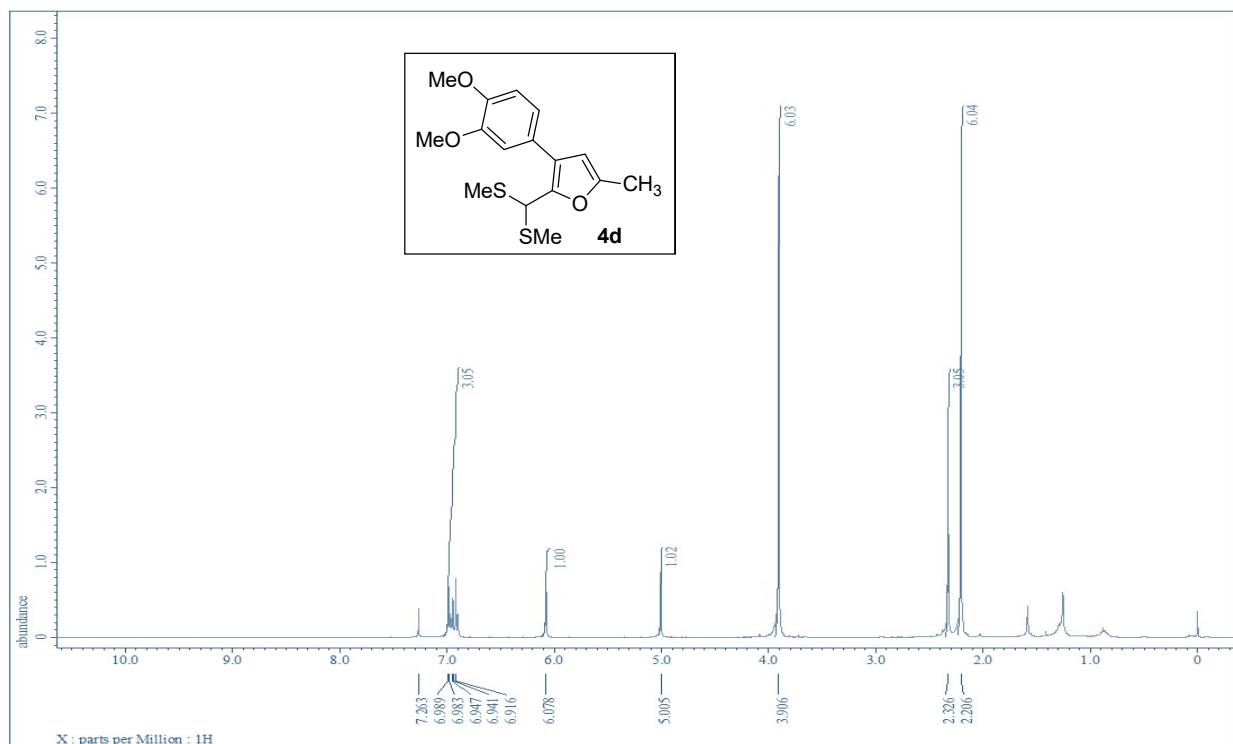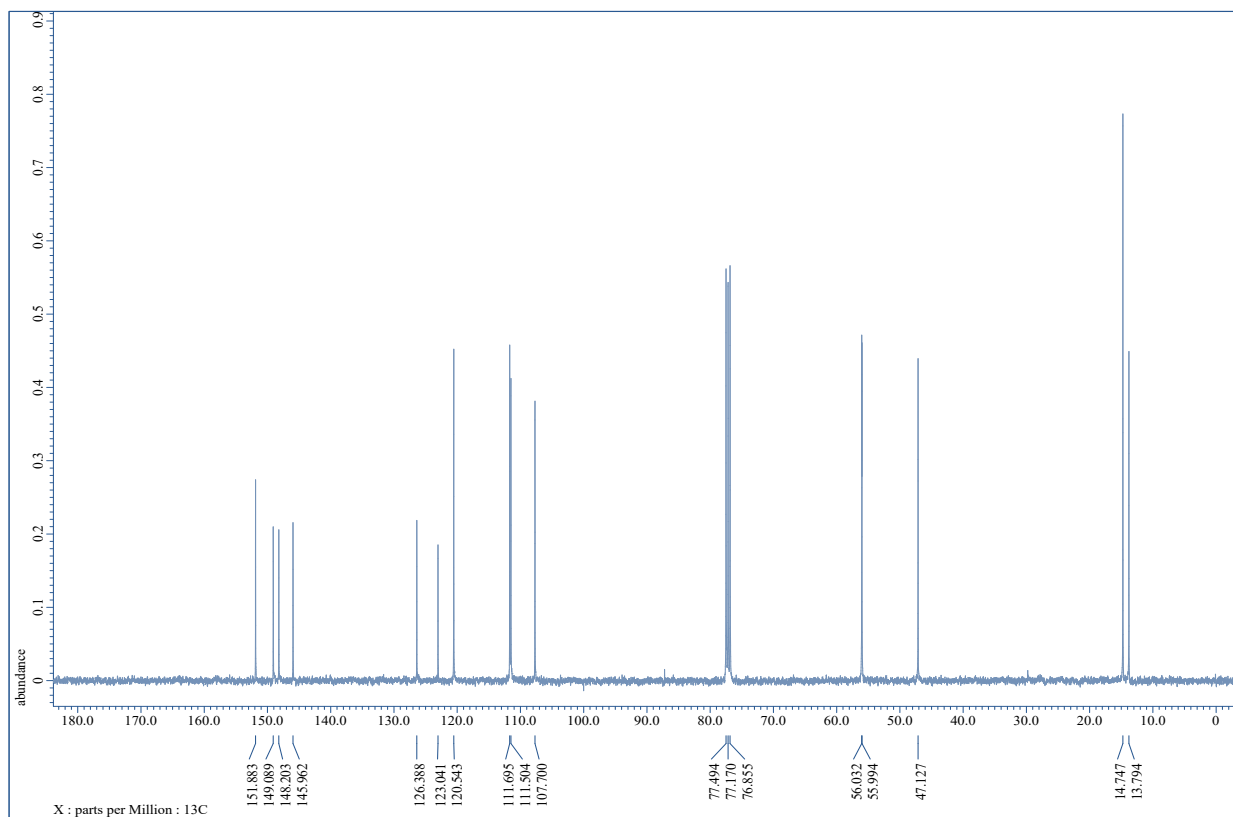

**<sup>1</sup>H NMR and <sup>13</sup>C NMR spectra of 2-(bis(methylthio)methyl)-3-(3,4-dimethoxyphenyl)-5-methylfuran (4d)**



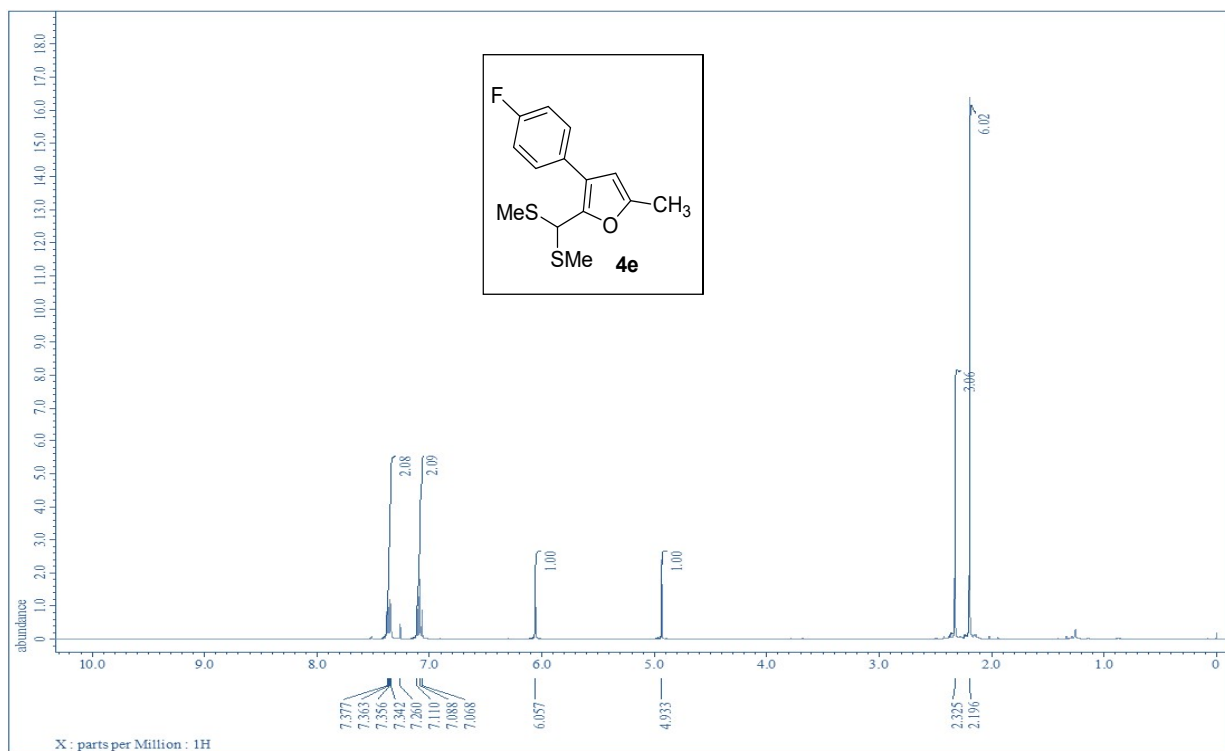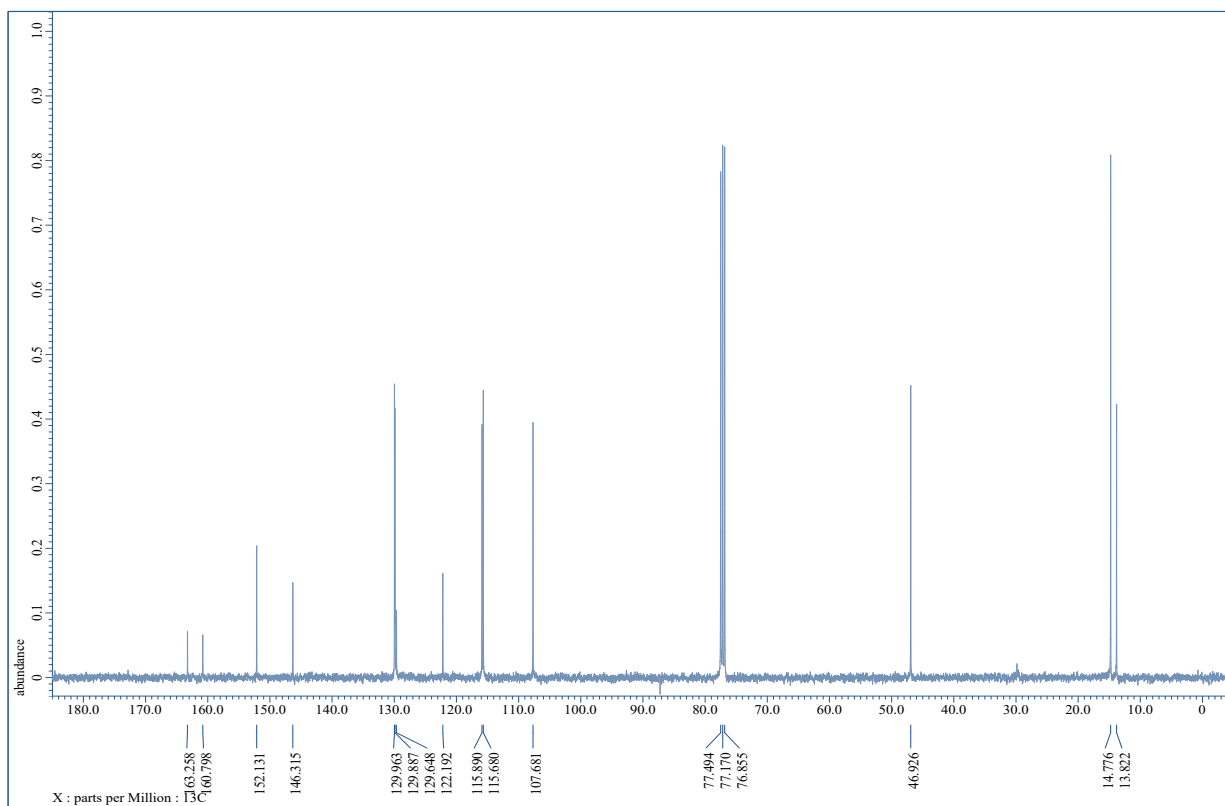

**<sup>1</sup>H NMR and <sup>13</sup>C NMR spectra of 2-(bis(methylthio)methyl)-3-(4-fluorophenyl)-5-methylfuran (4e)**

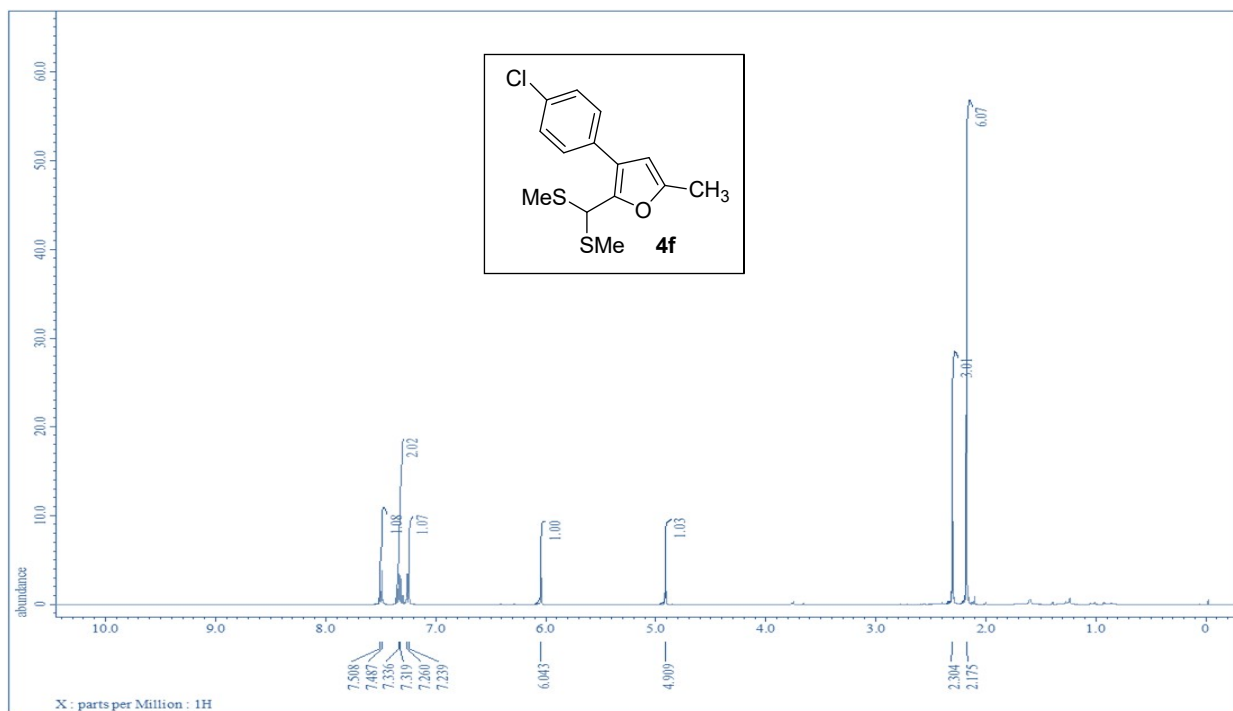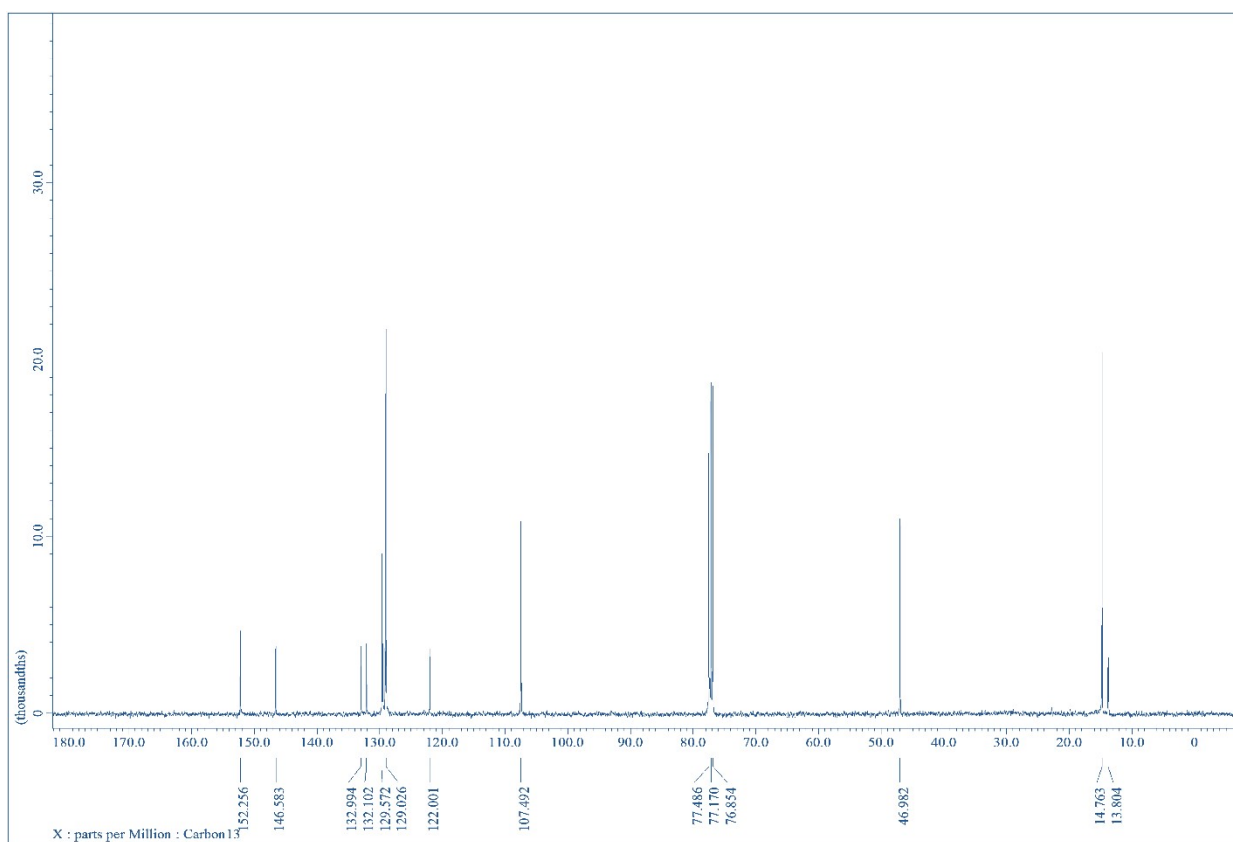

**<sup>1</sup>H NMR and <sup>13</sup>C NMR spectra of 3-(bis(methylthio)methyl)-2-(4-chlorophenyl)-5-methylfuran (4f)**

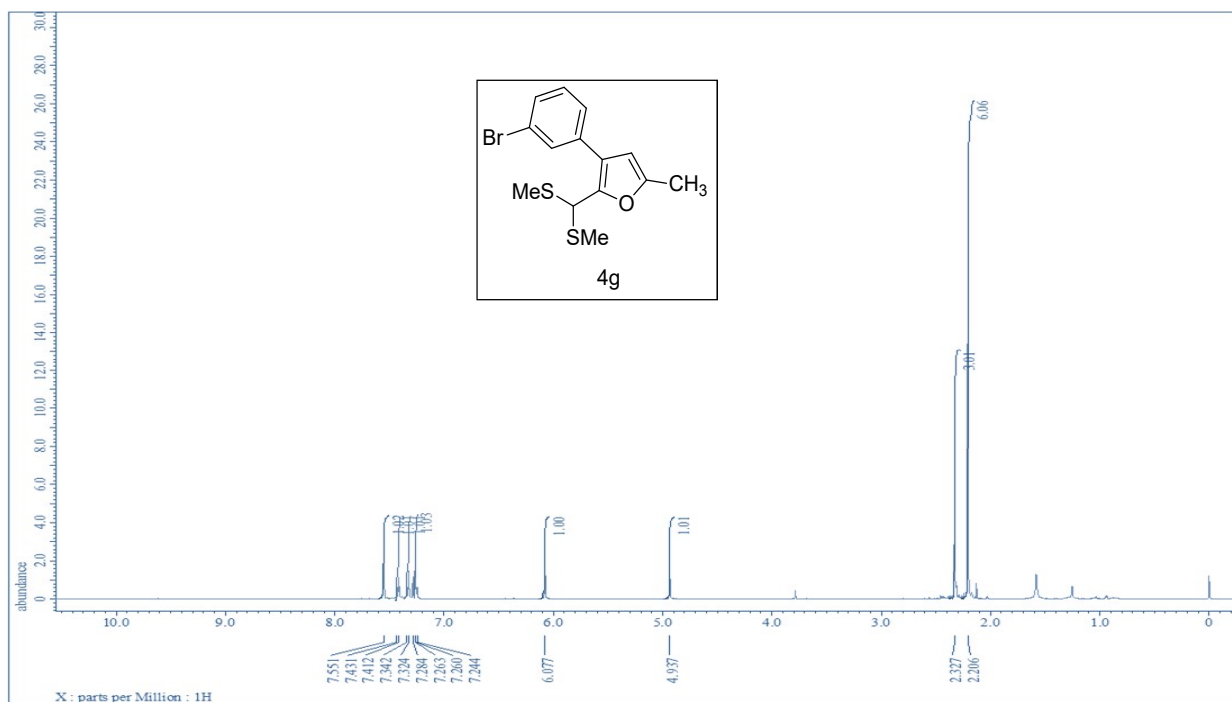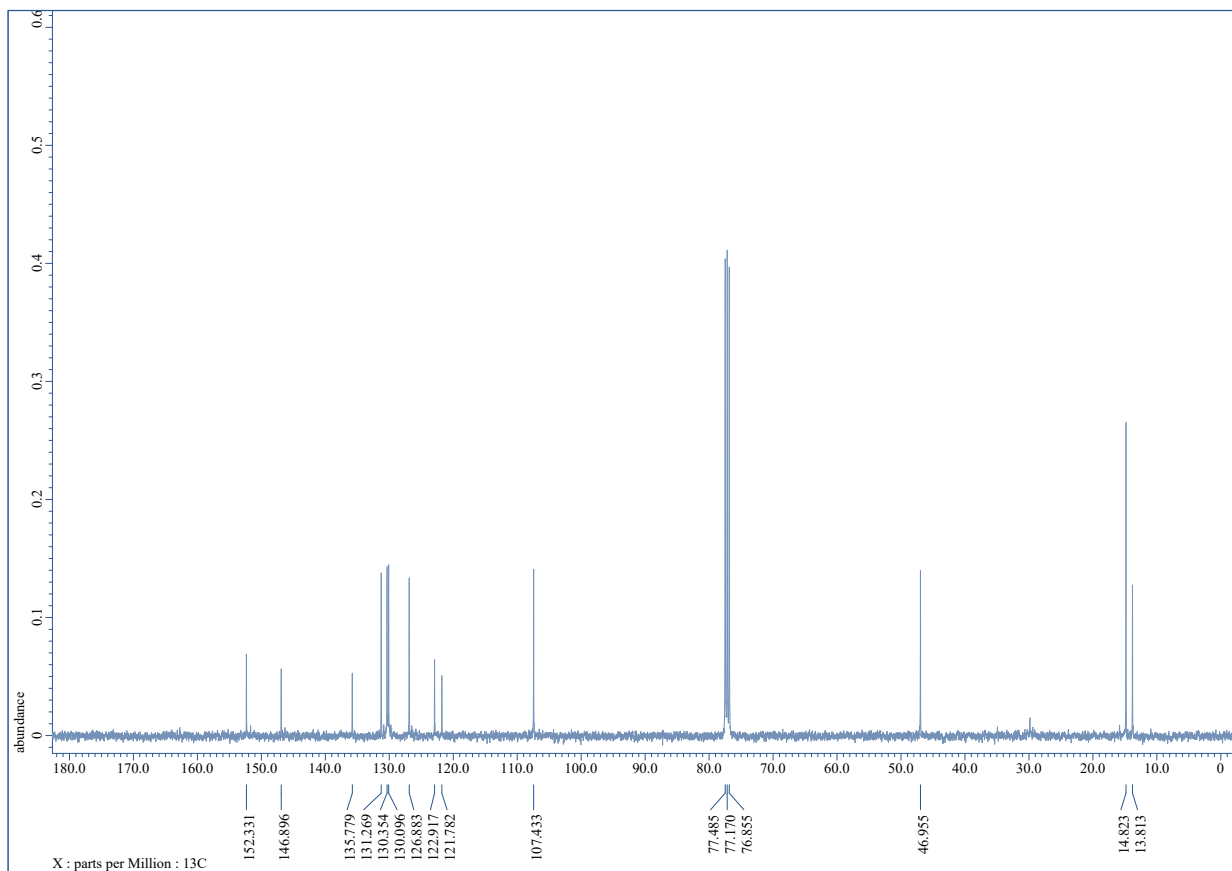

**<sup>1</sup>H NMR and <sup>13</sup>C NMR spectra of 2-(bis(methylthio)methyl)-3-(3-bromophenyl)-5-methylfuran (4g)**

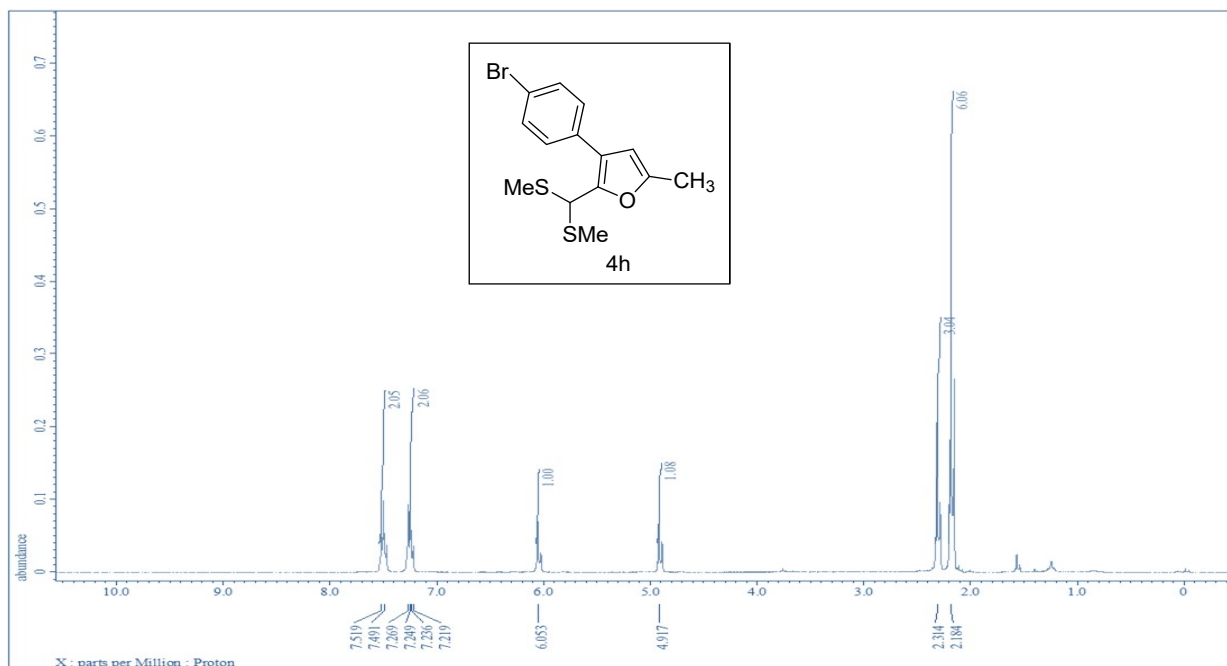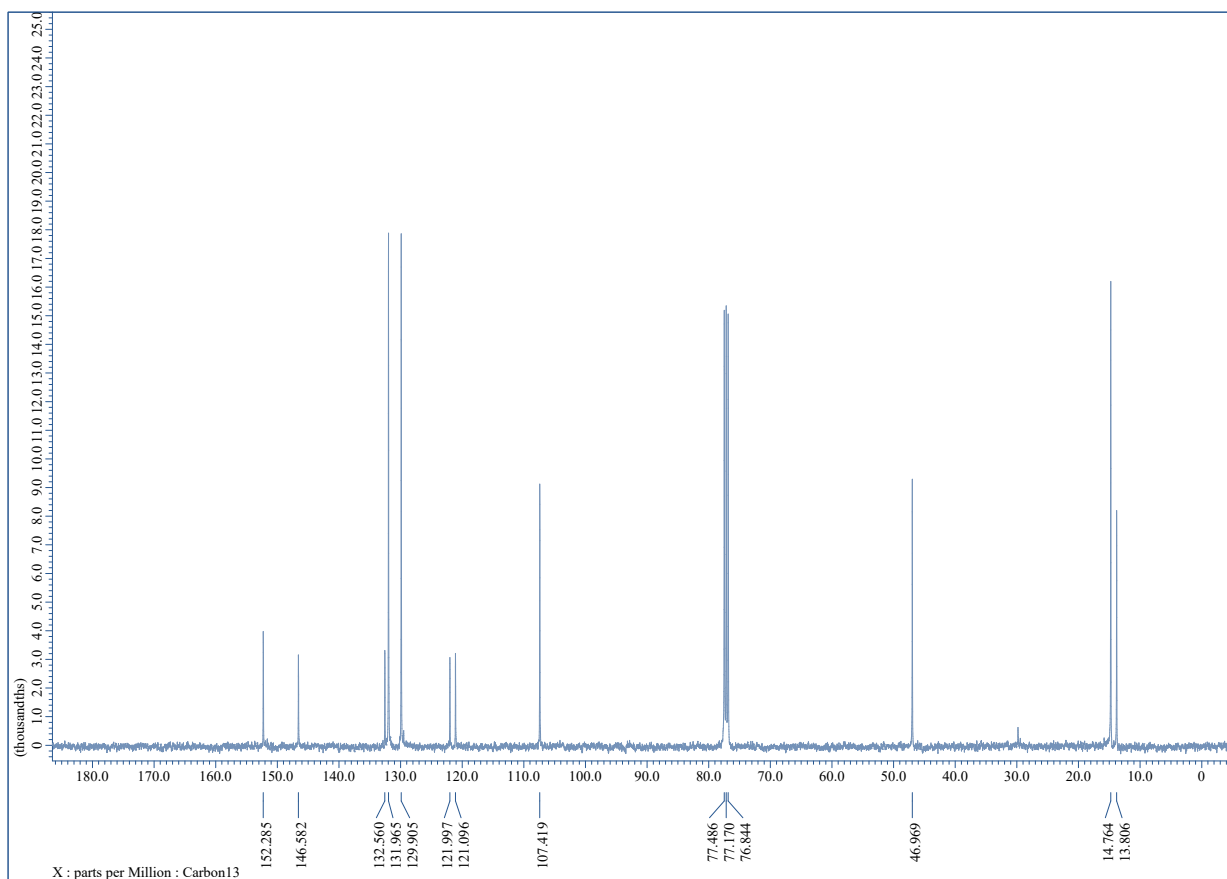

**<sup>1</sup>H NMR and <sup>13</sup>C NMR spectra of 2-(bis(methylthio)methyl)-3-(4-bromophenyl)-5-methylfuran (4h)**

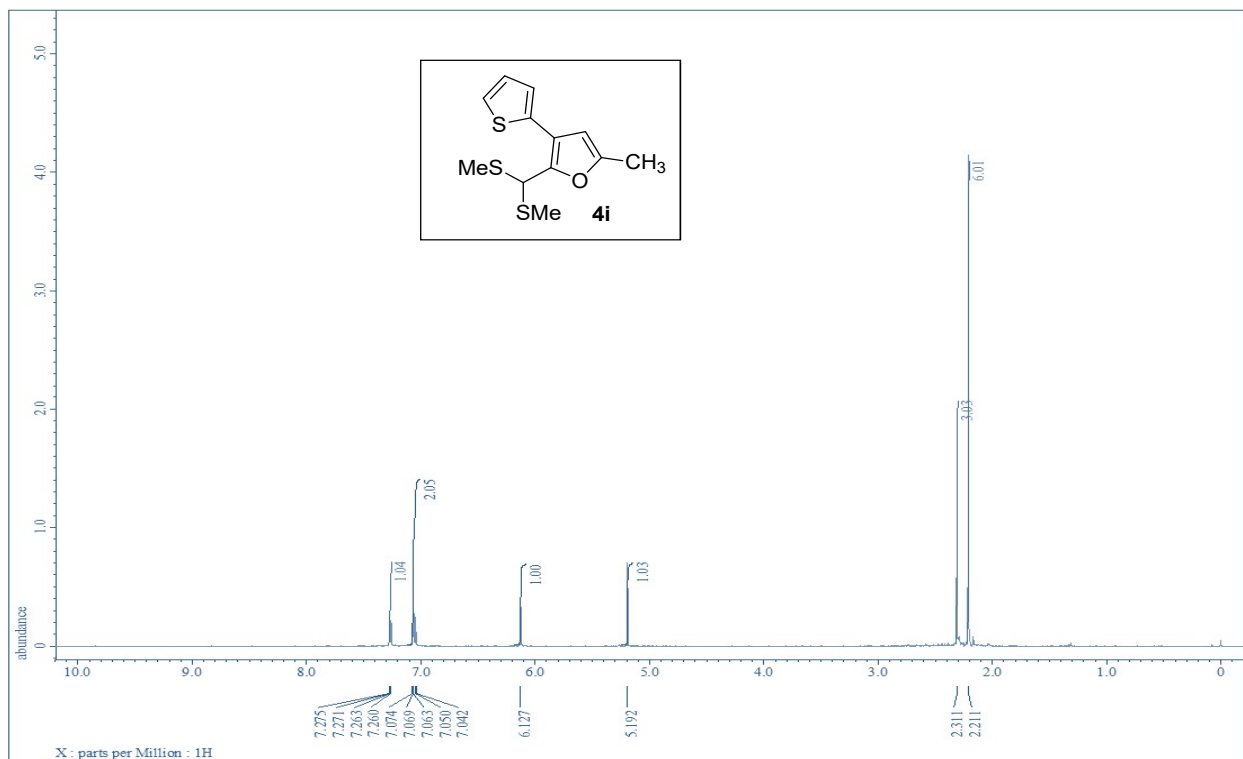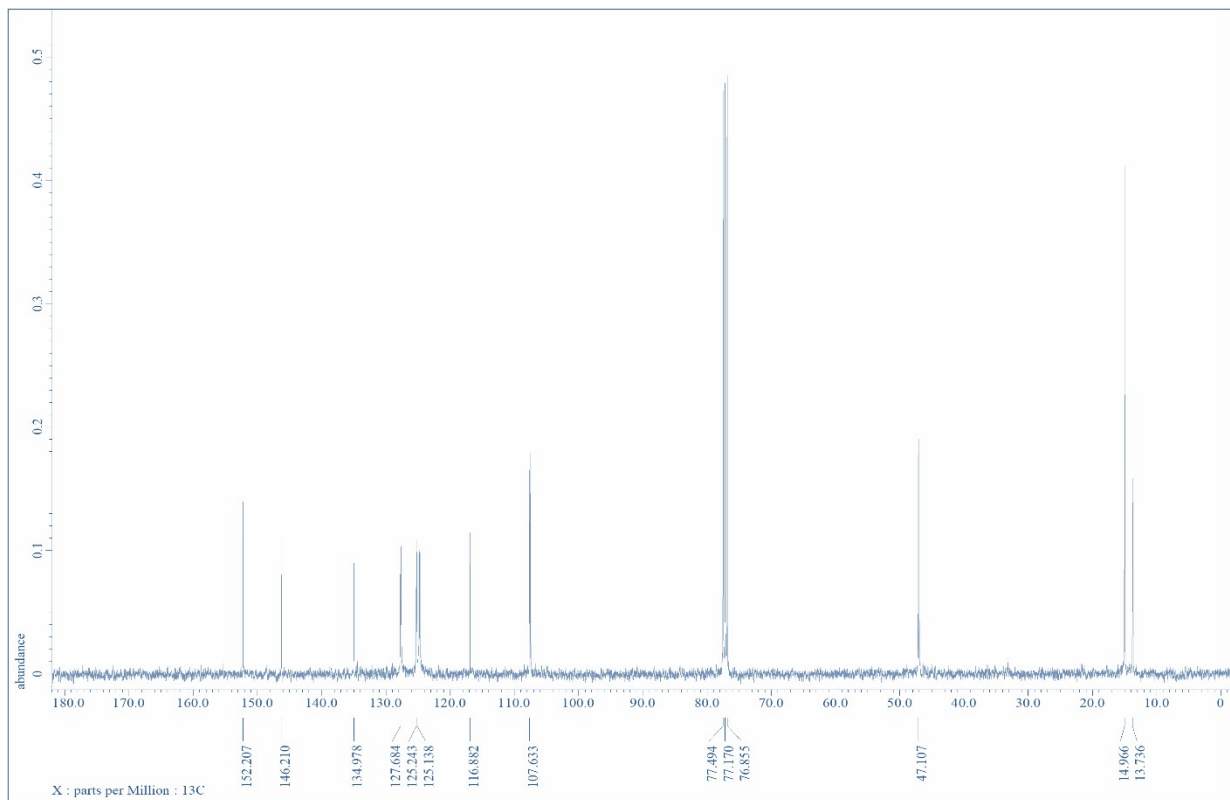

**<sup>1</sup>H NMR and <sup>13</sup>C NMR spectra of 3-(bis(methylthio)methyl)-5-methyl-2-(thiophen-2-yl)furan (4i)**

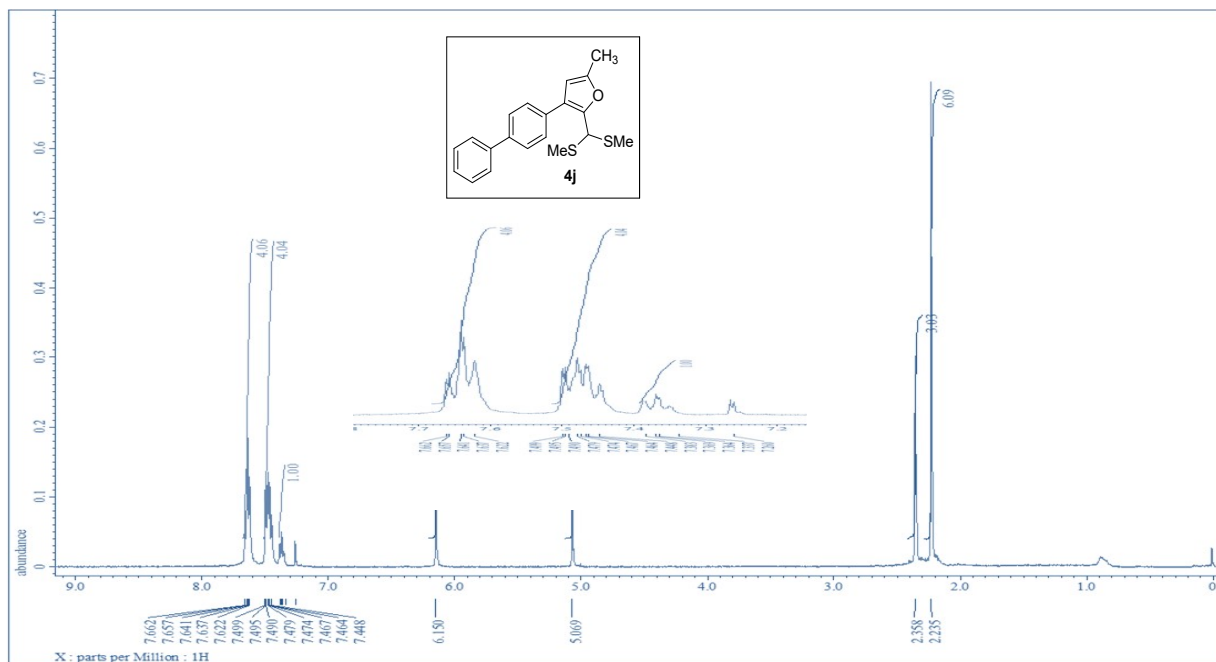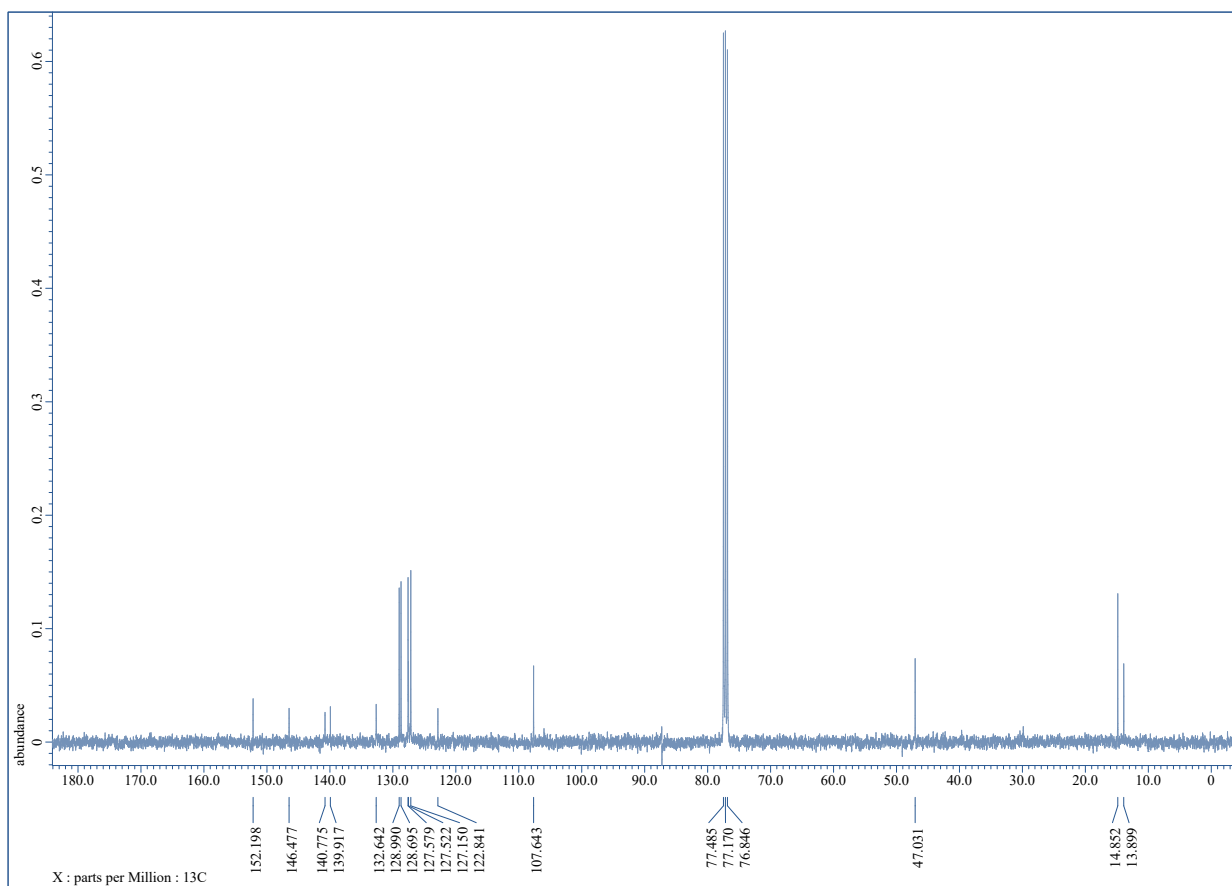

**<sup>1</sup>H NMR and <sup>13</sup>C NMR spectra of 2-([1,1'-biphenyl]-4-yl)-3-(bis(methylthio)methyl)-5-methylfuran (4j)**

RSR-Cy-1

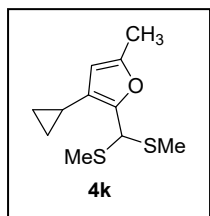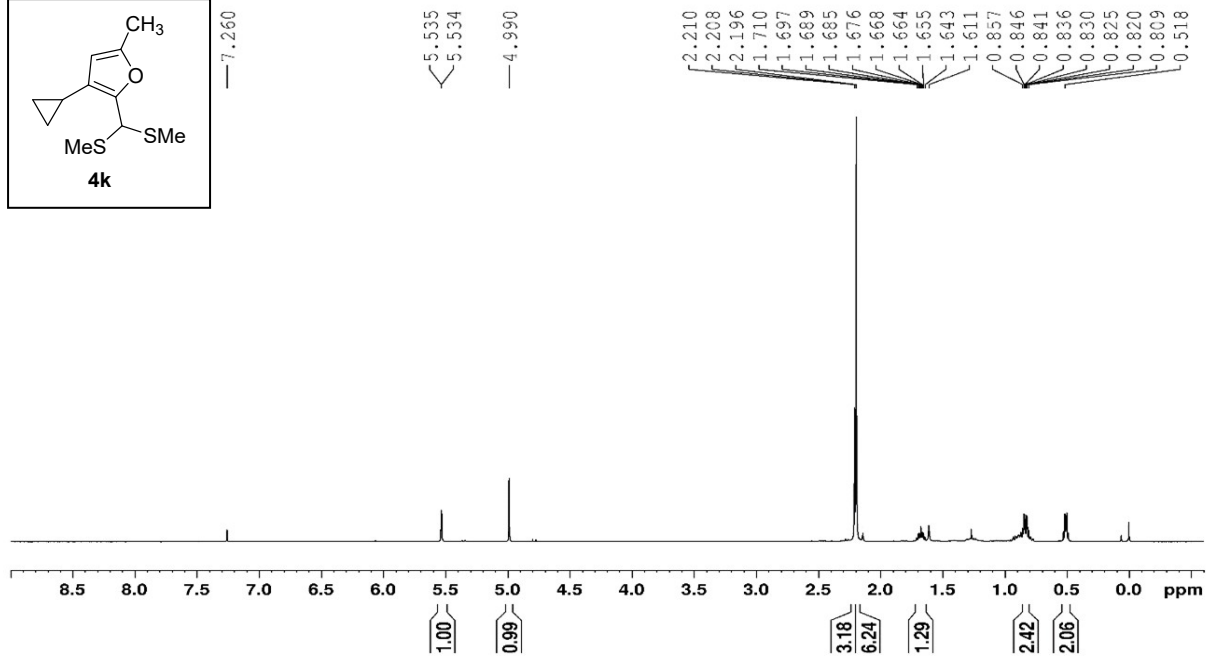

RSR-Cy-1

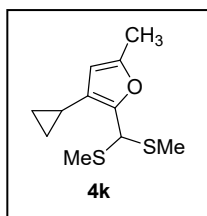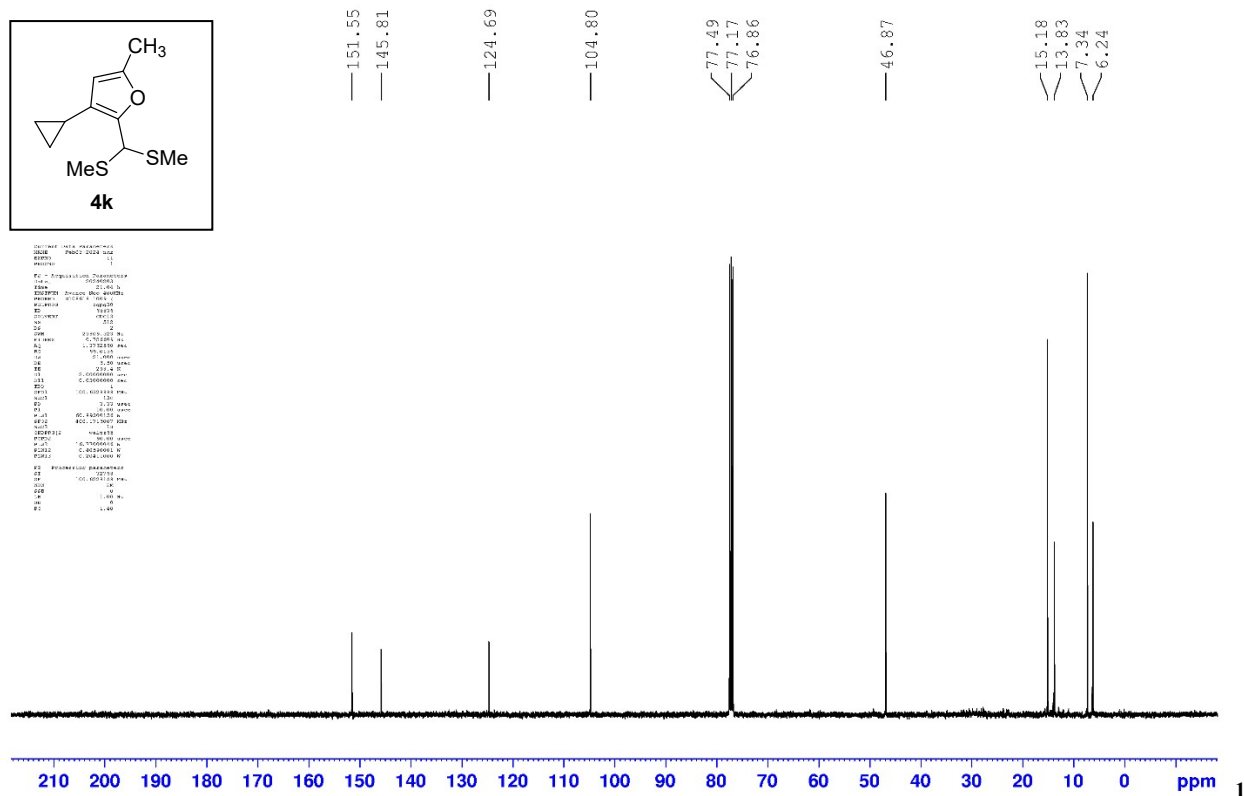

**<sup>1</sup>H NMR and <sup>13</sup>C NMR spectra of 2-(bis(methylthio)methyl)-3-cyclopropyl-5-methylfuran (4k)**

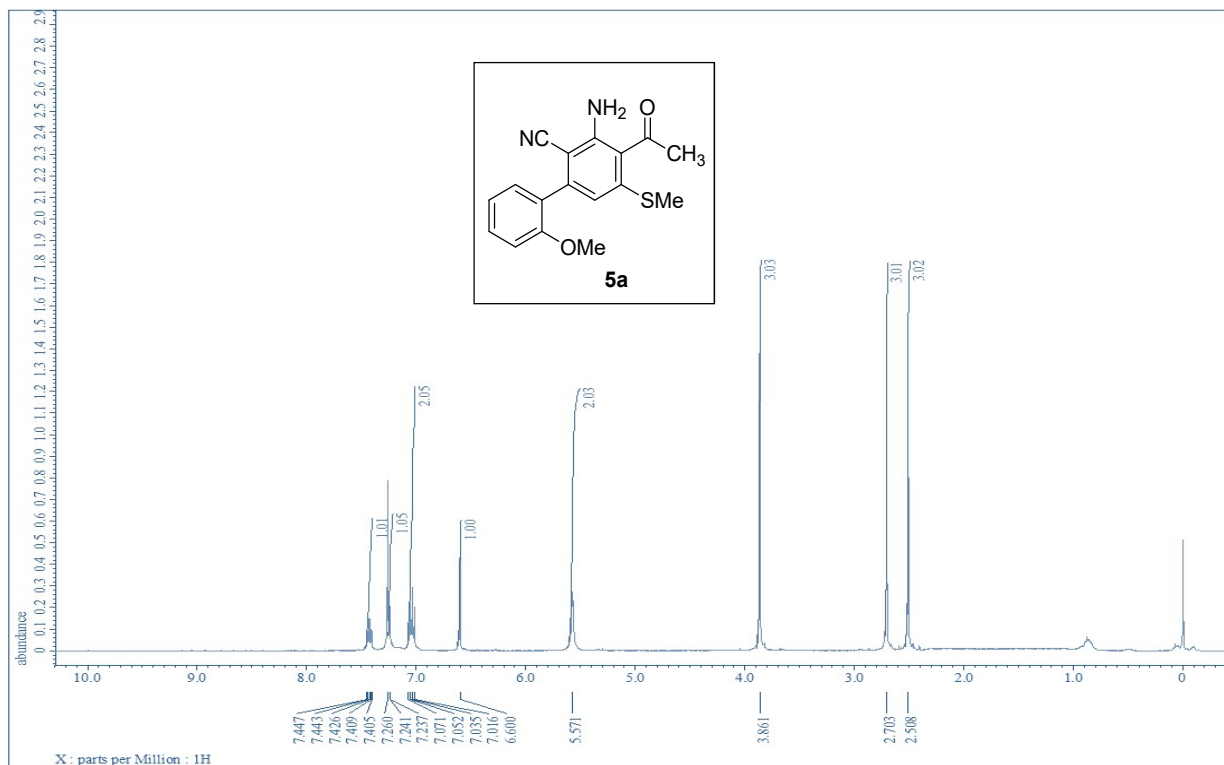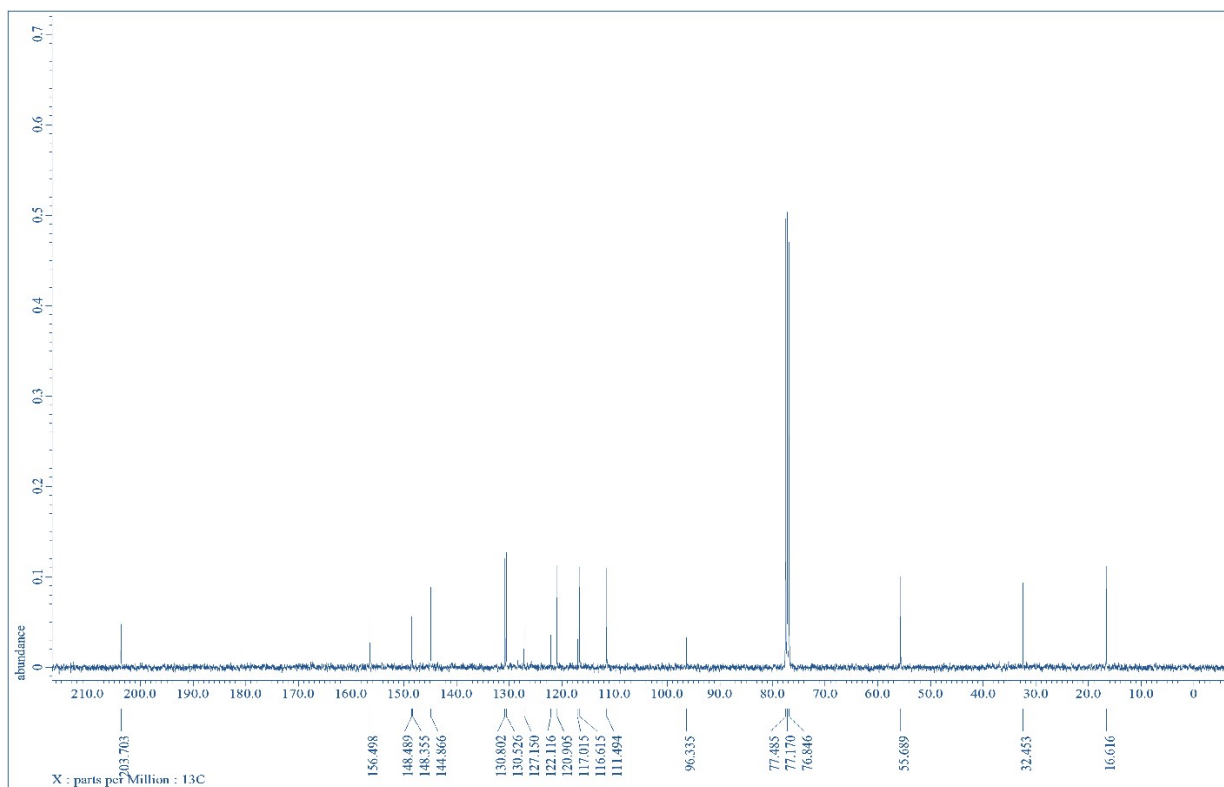

**<sup>1</sup>H NMR and <sup>13</sup>C NMR spectrum of 4-acetyl-3-amino-2'-methoxy-5-(methylthio)-[1,1'-biphenyl]-2-carbonitrile (5a)**



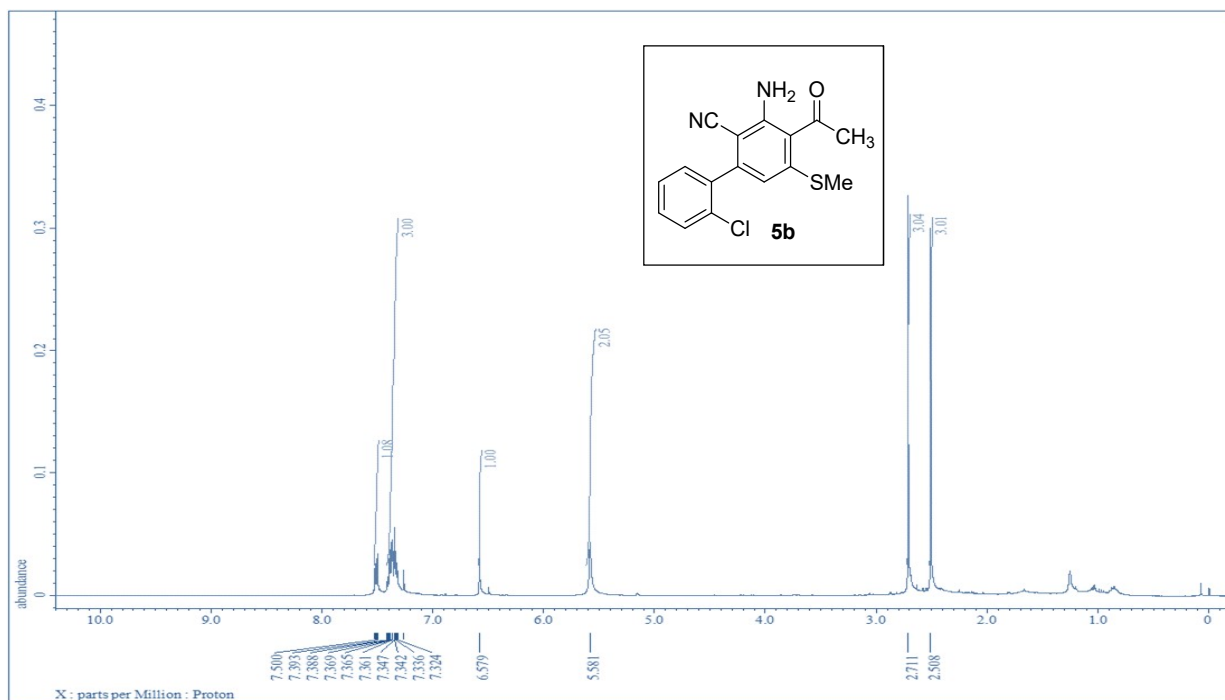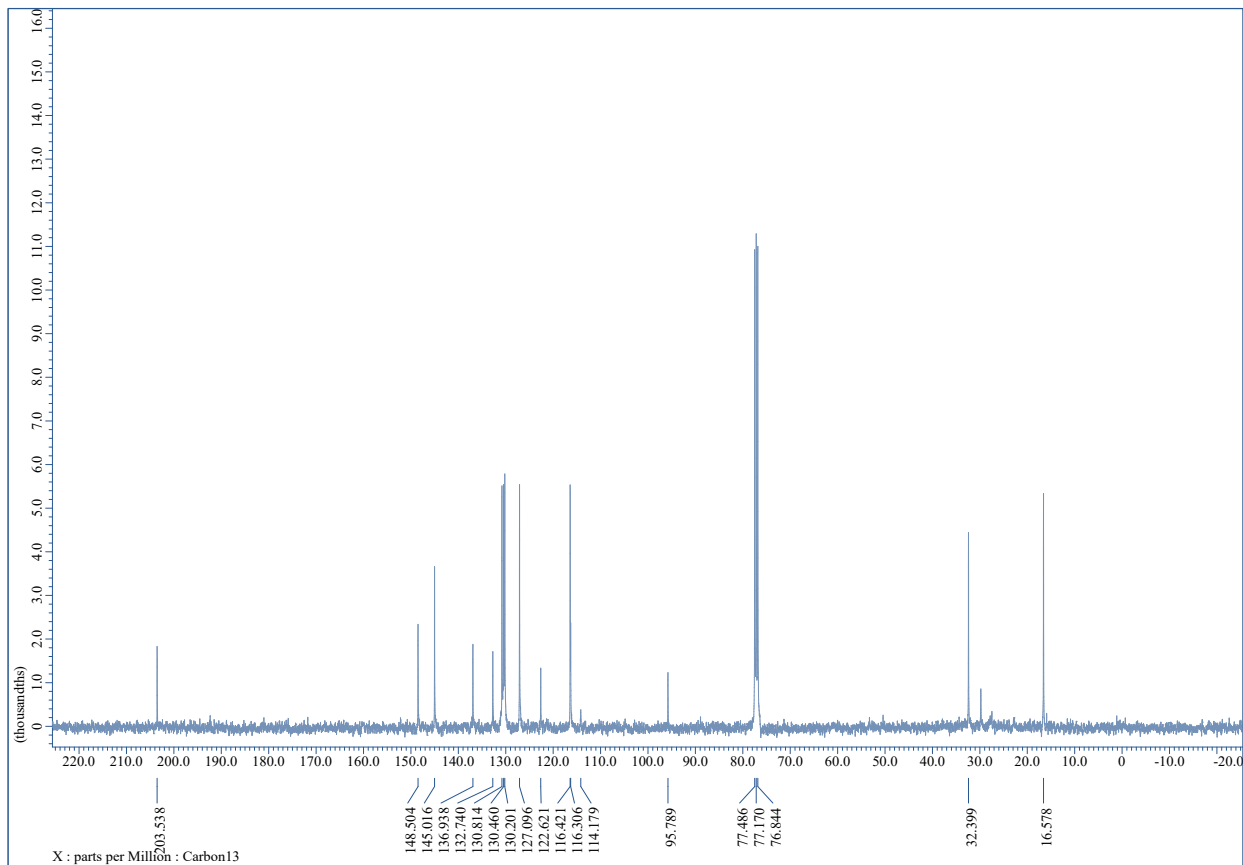

**<sup>1</sup>H NMR and <sup>13</sup>C NMR spectrum of 4-acetyl-3-amino-2'-chloro-5-(methylthio)-[1,1'-biphenyl]-2-carbonitrile (**5b**)**

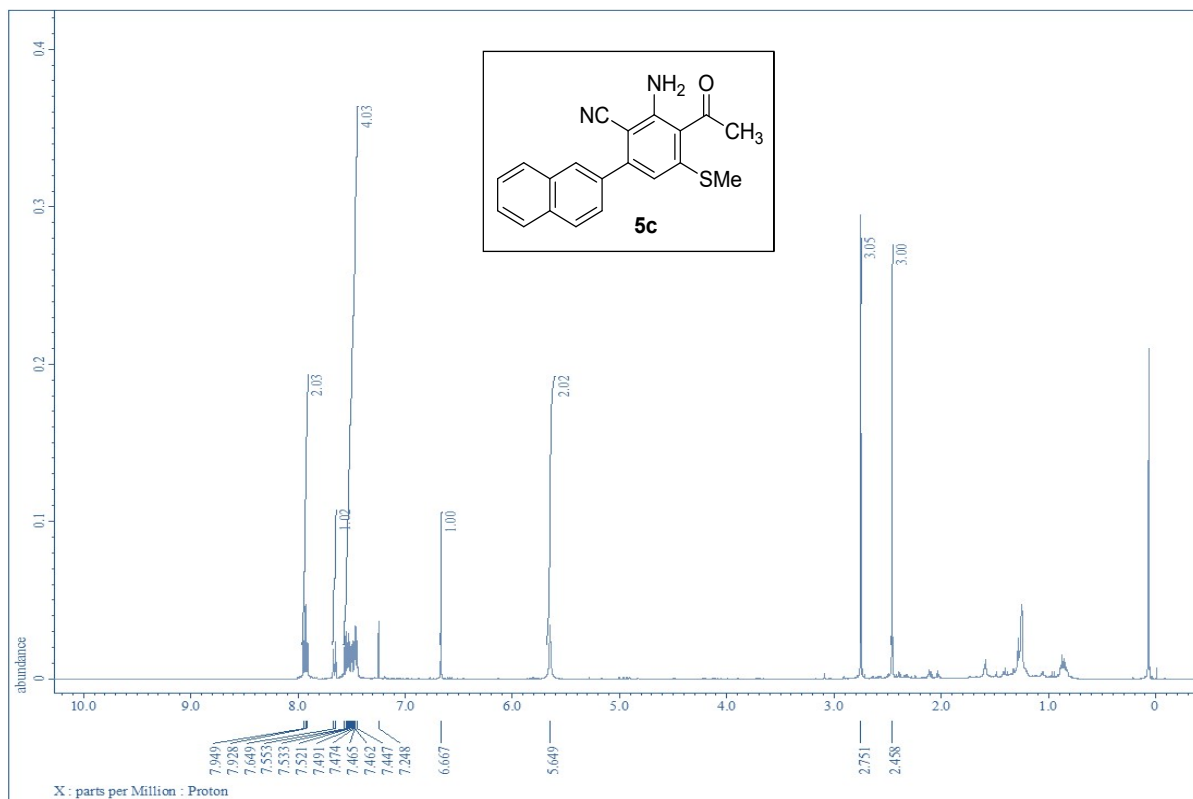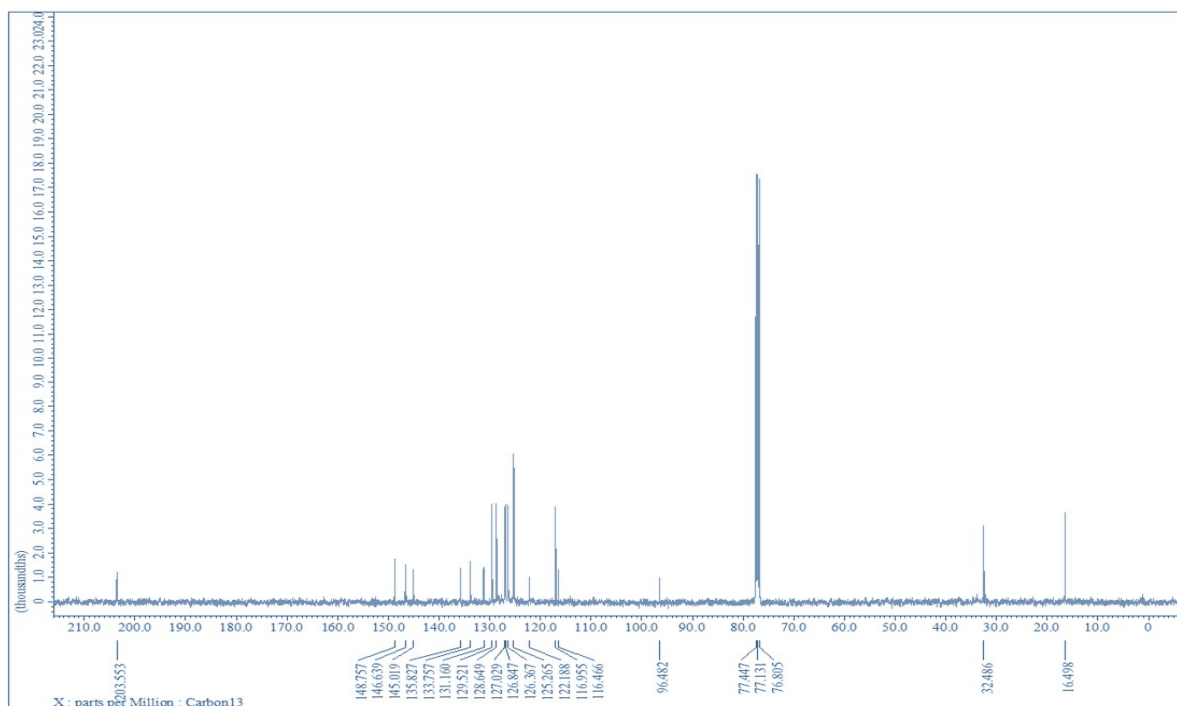

**<sup>1</sup>H NMR and <sup>13</sup>C NMR spectrum of 3-acetyl-2-amino-4-(methylthio)-6-(naphthalen-2-yl)benzotrile (5c)**

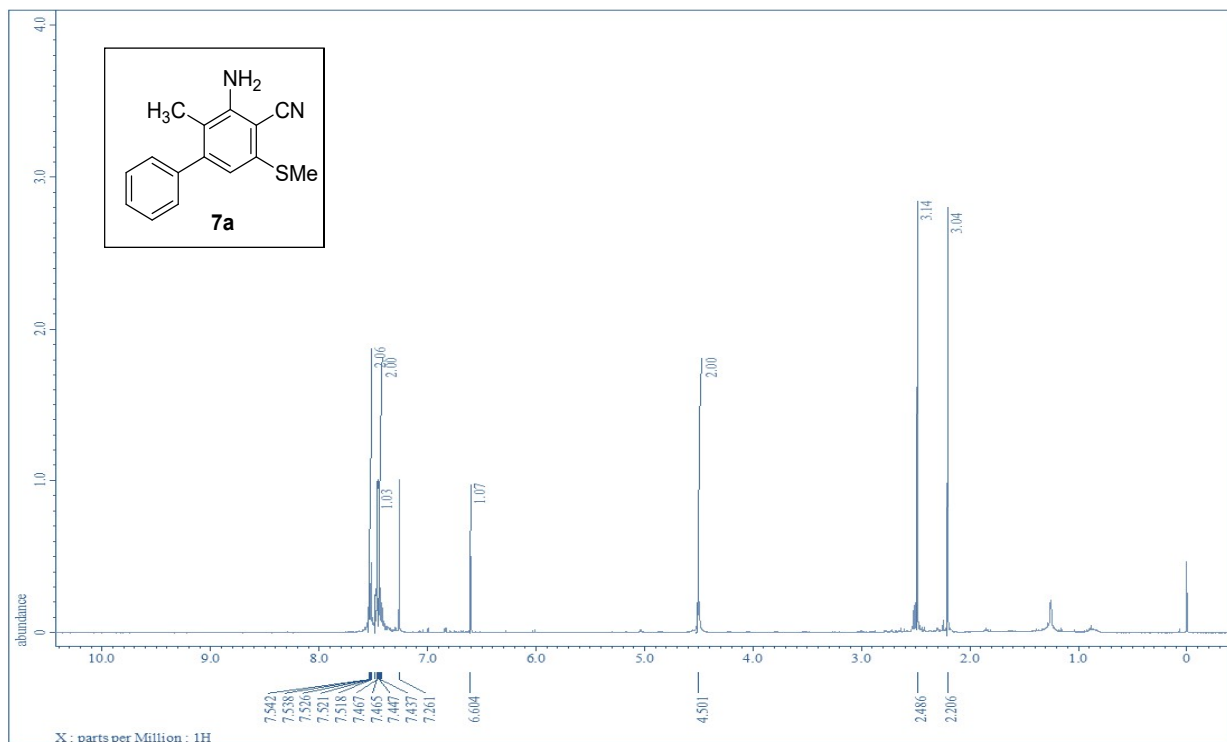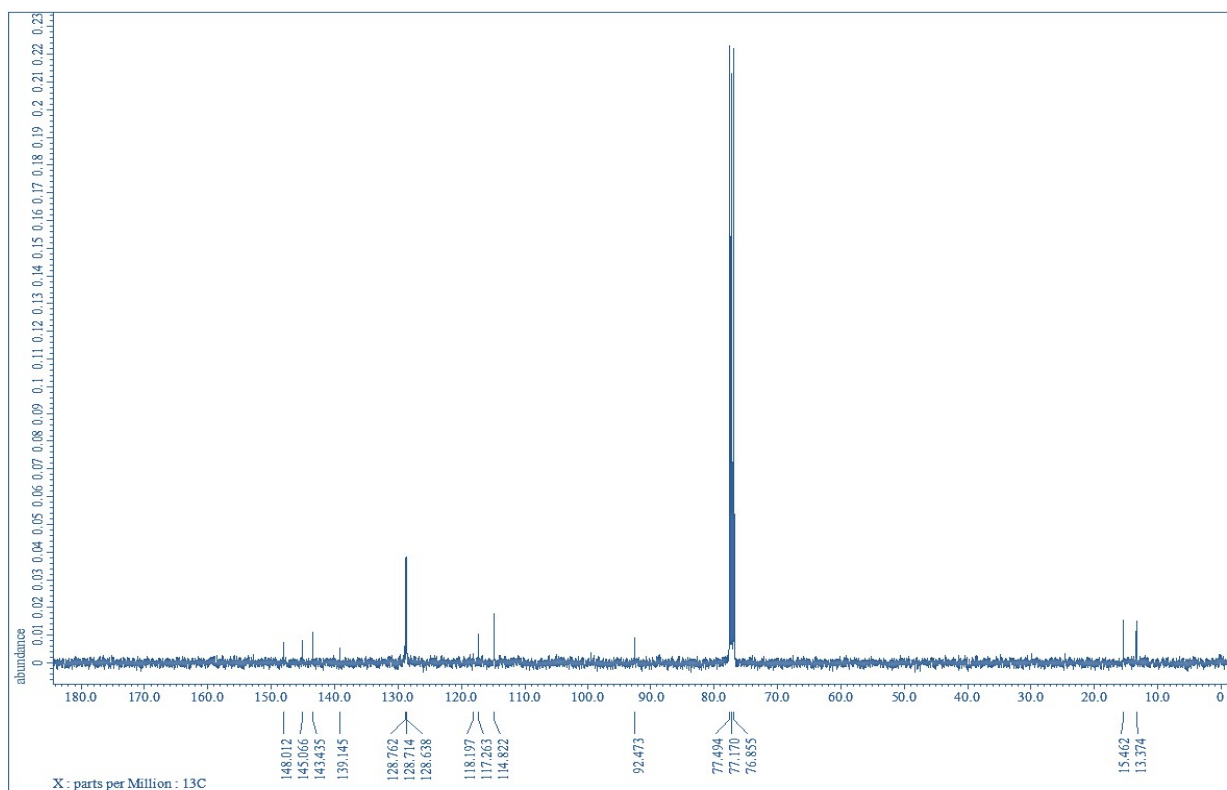

**<sup>1</sup>H NMR and <sup>13</sup>C NMR spectra of 3-amino-2-methyl-5-(methylthio)-[1,1'-biphenyl]-4-carbonitrile (7a)**

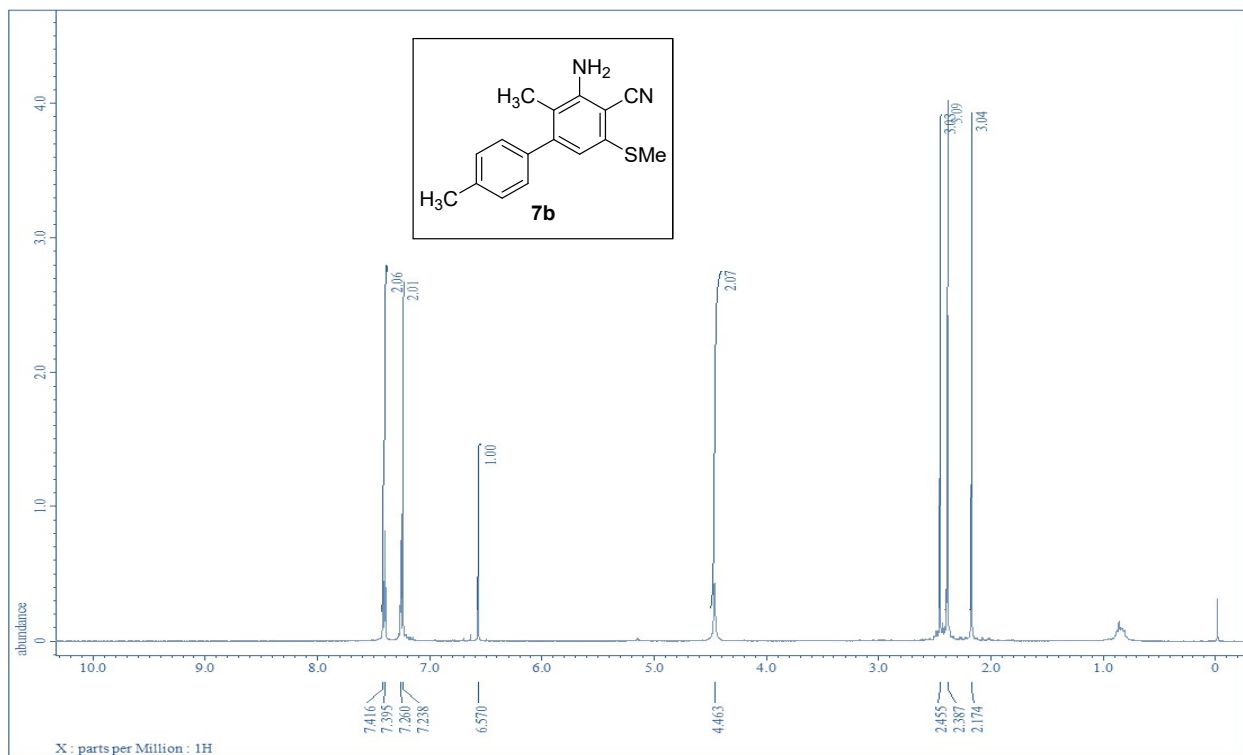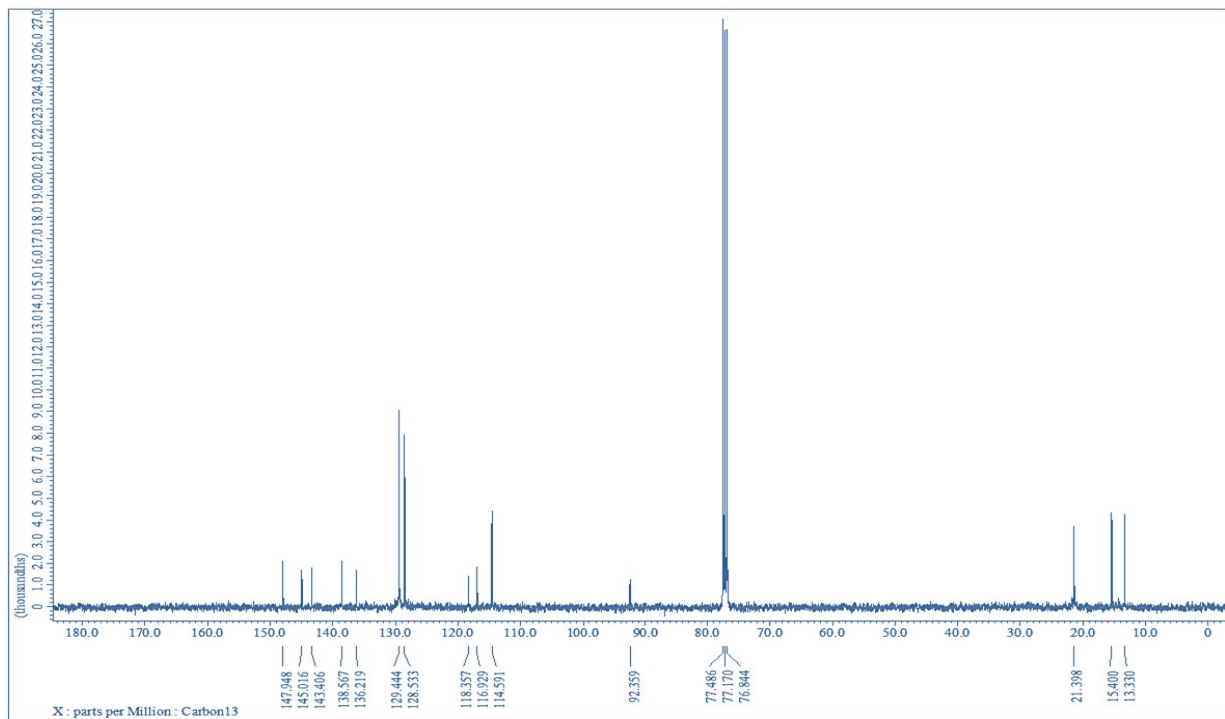

**<sup>1</sup>H NMR and <sup>13</sup>C NMR spectrum of 3-amino-2,4'-dimethyl-5-(methylthio)-[1,1'-biphenyl]-4-carbonitrile (7b)**

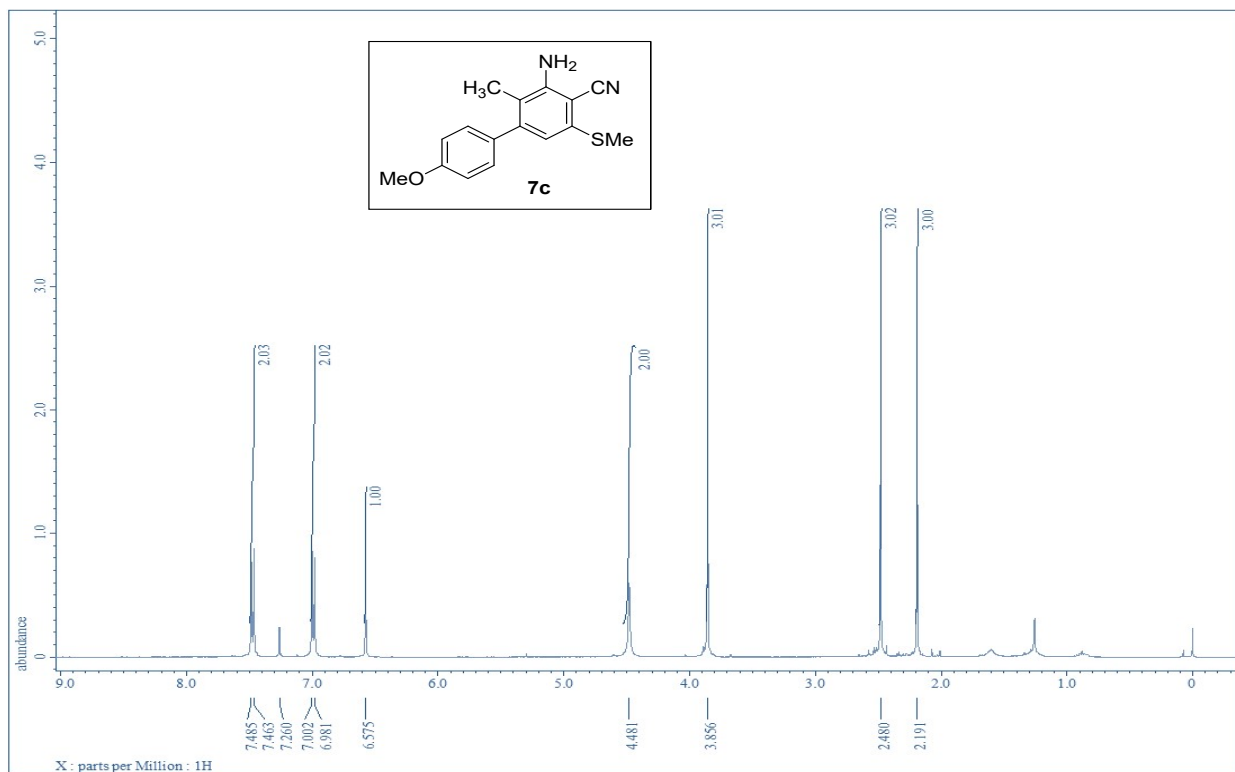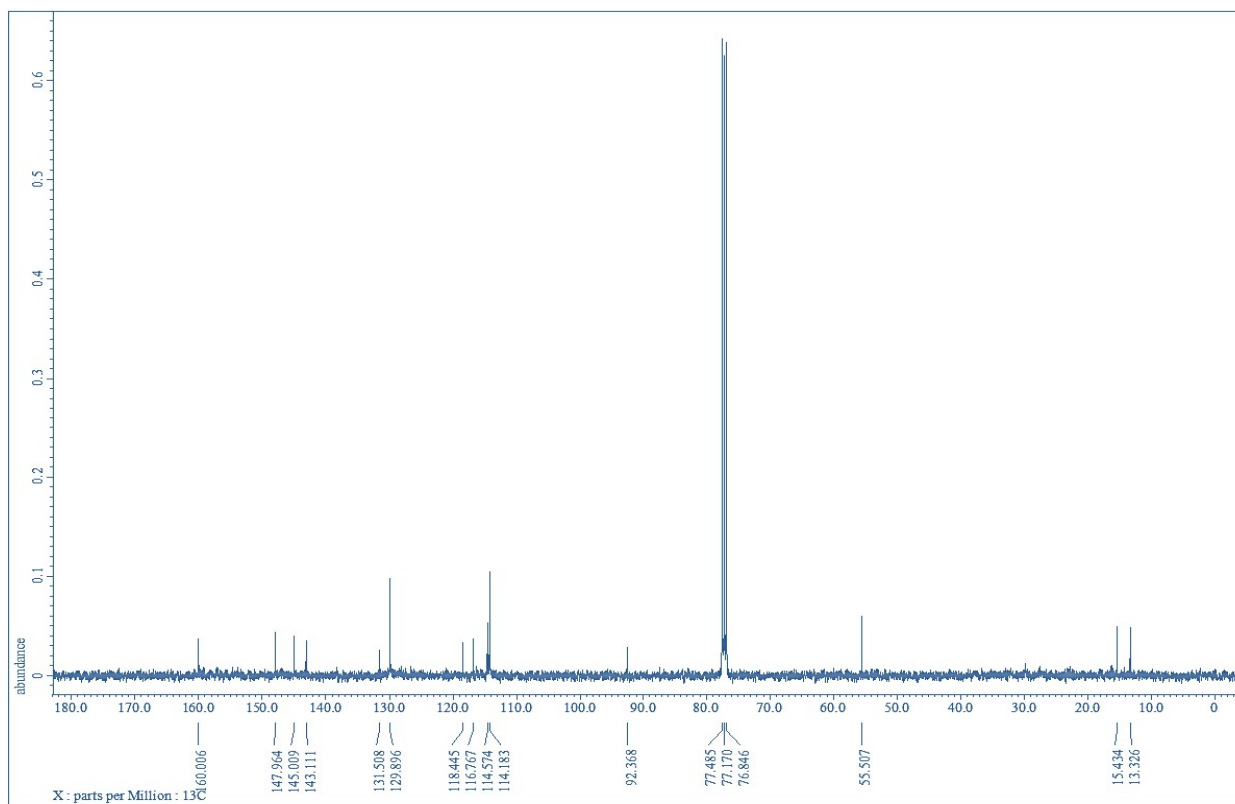

**<sup>1</sup>H NMR and <sup>13</sup>C NMR spectrum of 3-amino-4'-methoxy-2-methyl-5-(methylthio)-[1,1'-biphenyl]-4-carbonitrile (7c)**

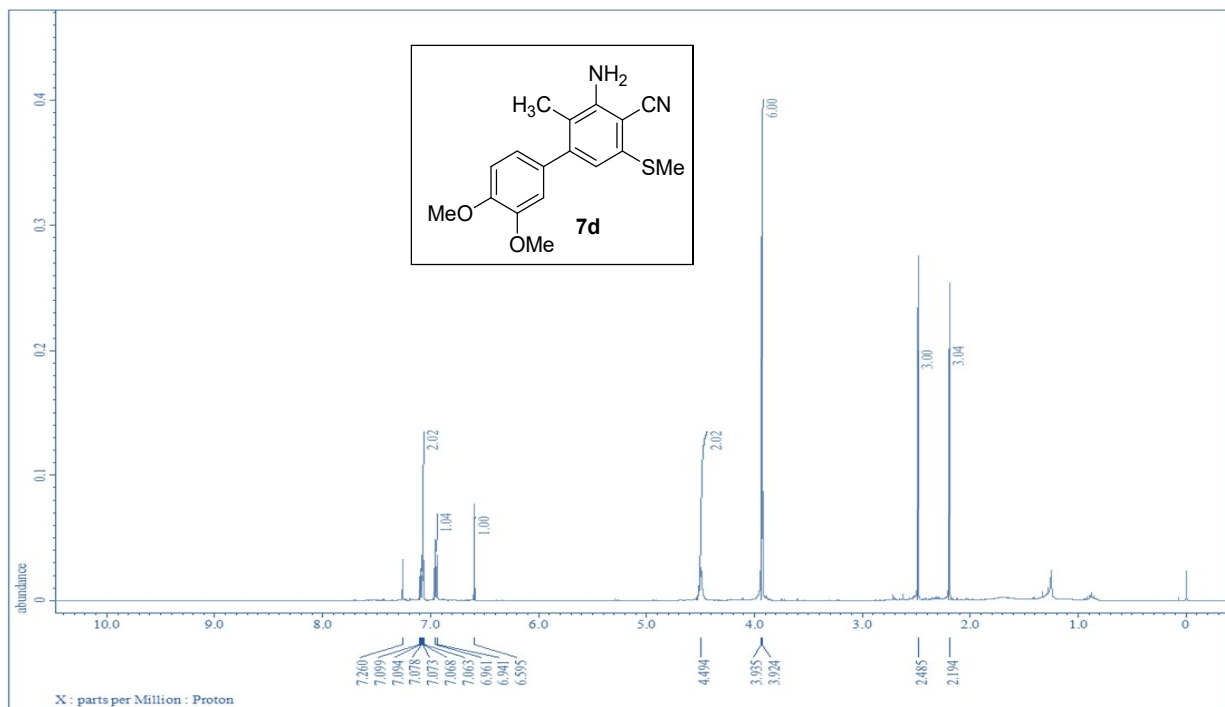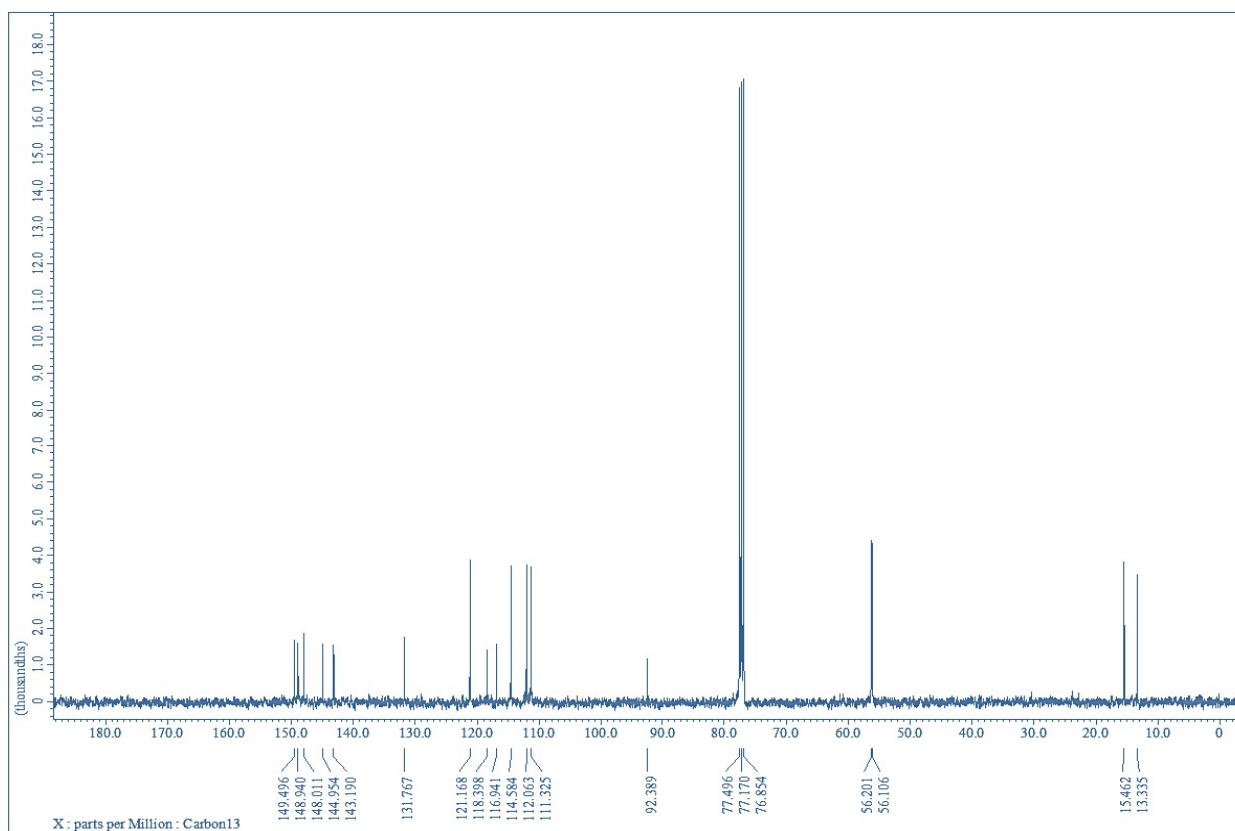

**<sup>1</sup>H NMR and <sup>13</sup>C NMR spectrum of 3-amino-3',4'-dimethoxy-2-methyl-5-(methylthio)-[1,1'-biphenyl]-4-carbonitrile (7d)**

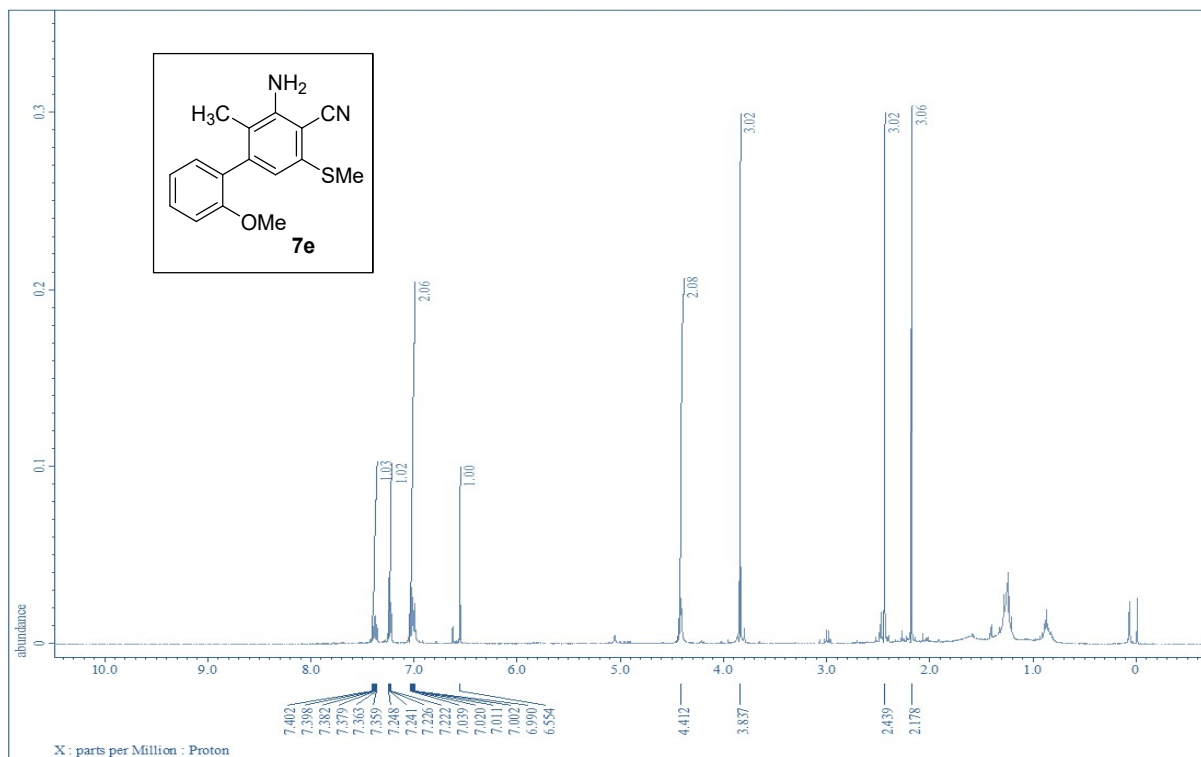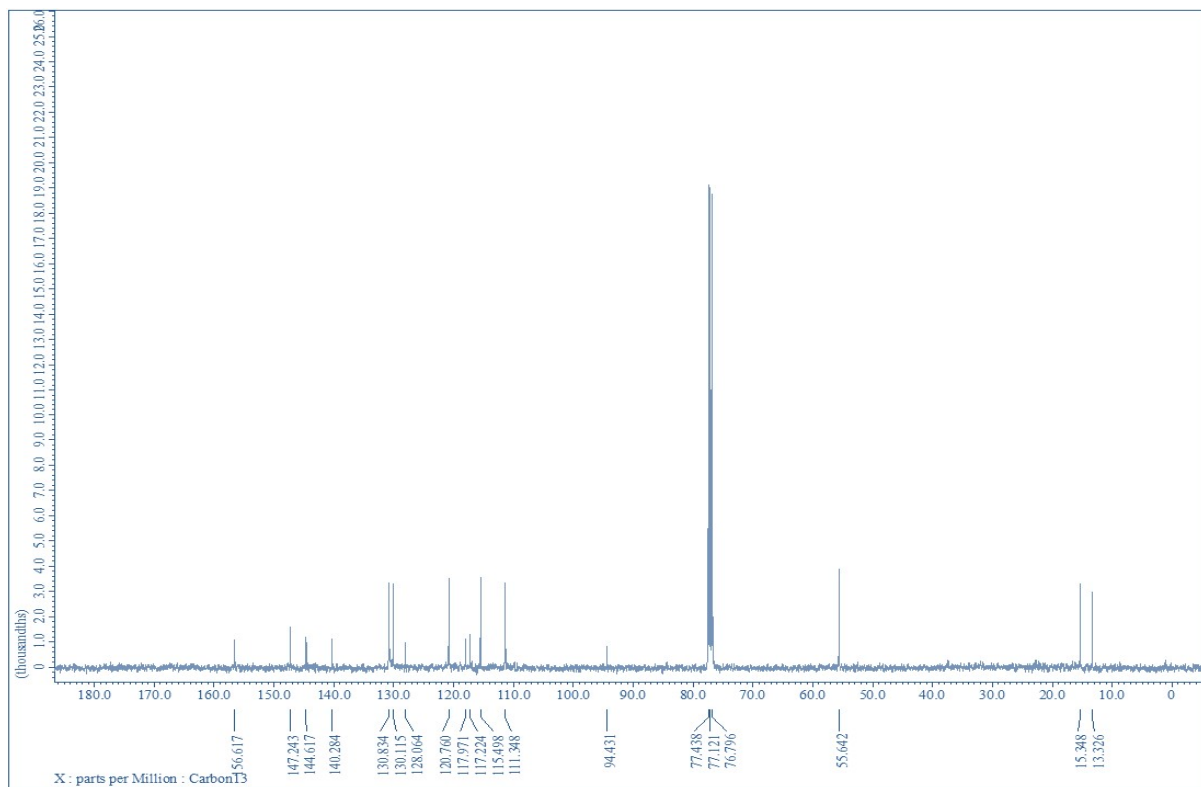

**<sup>1</sup>H NMR and <sup>13</sup>C NMR spectrum of 3-amino-2'-methoxy-2-methyl-5-(methylthio)-[1,1'-biphenyl]-4-carbonitrile (7e)**

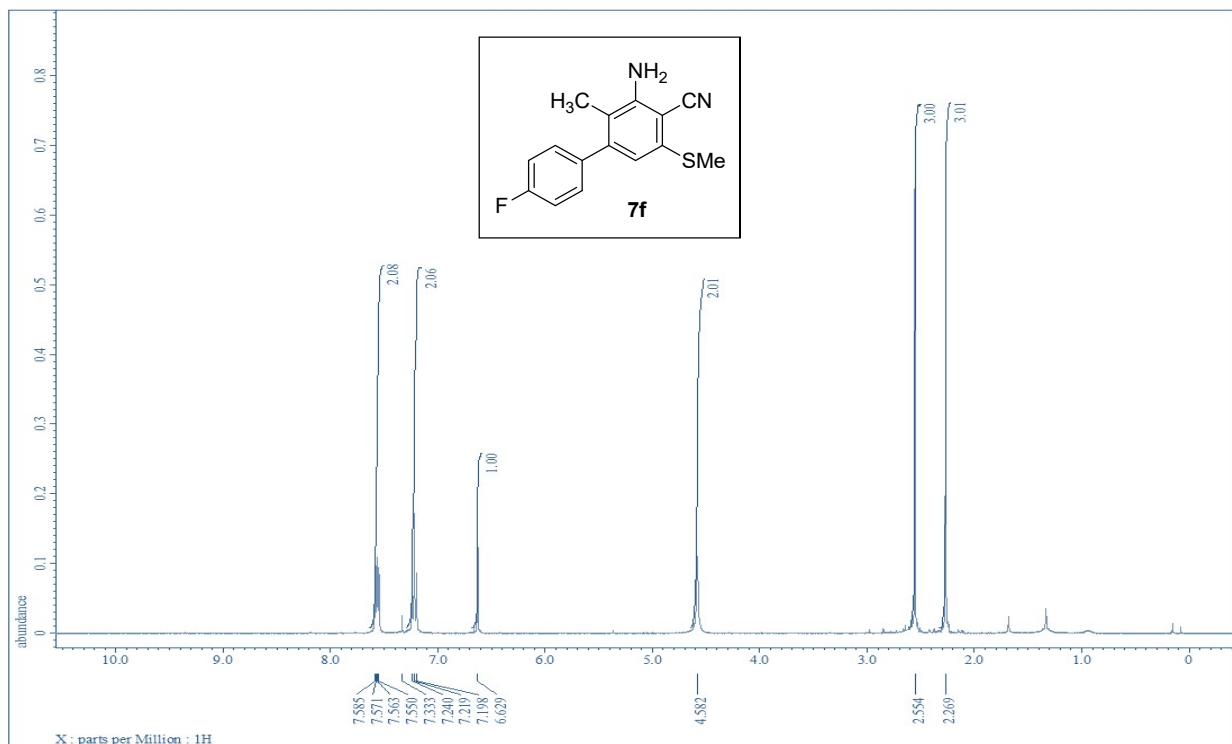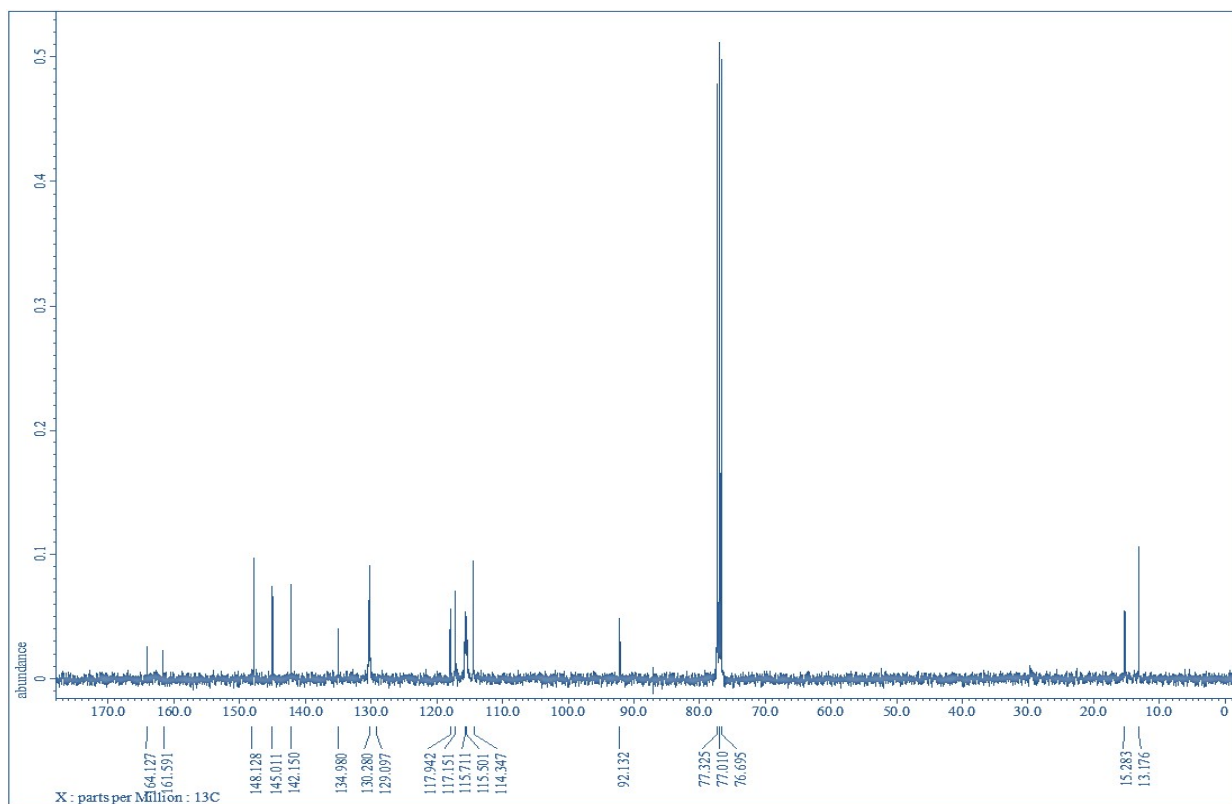

**<sup>1</sup>H NMR and <sup>13</sup>C NMR spectrum of 3-amino-4'-fluoro-2-methyl-5-(methylthio)-[1,1'-biphenyl]-4-carbonitrile (7f)**



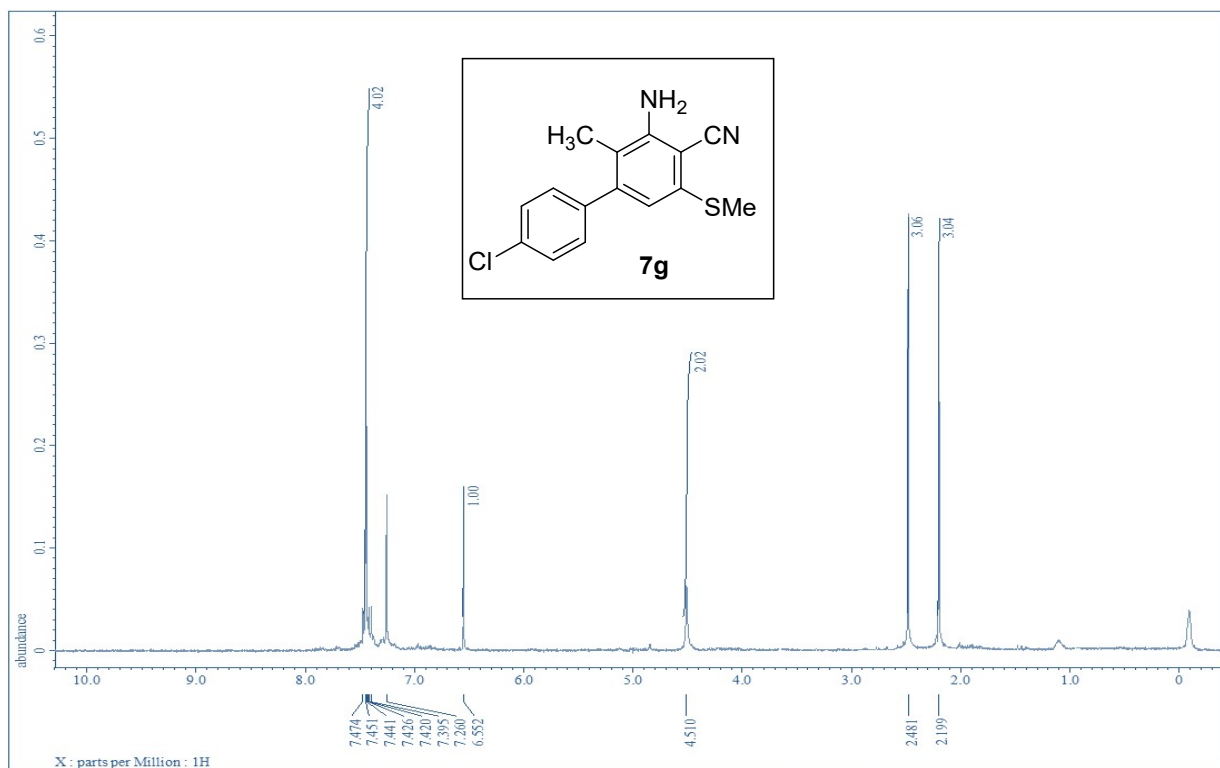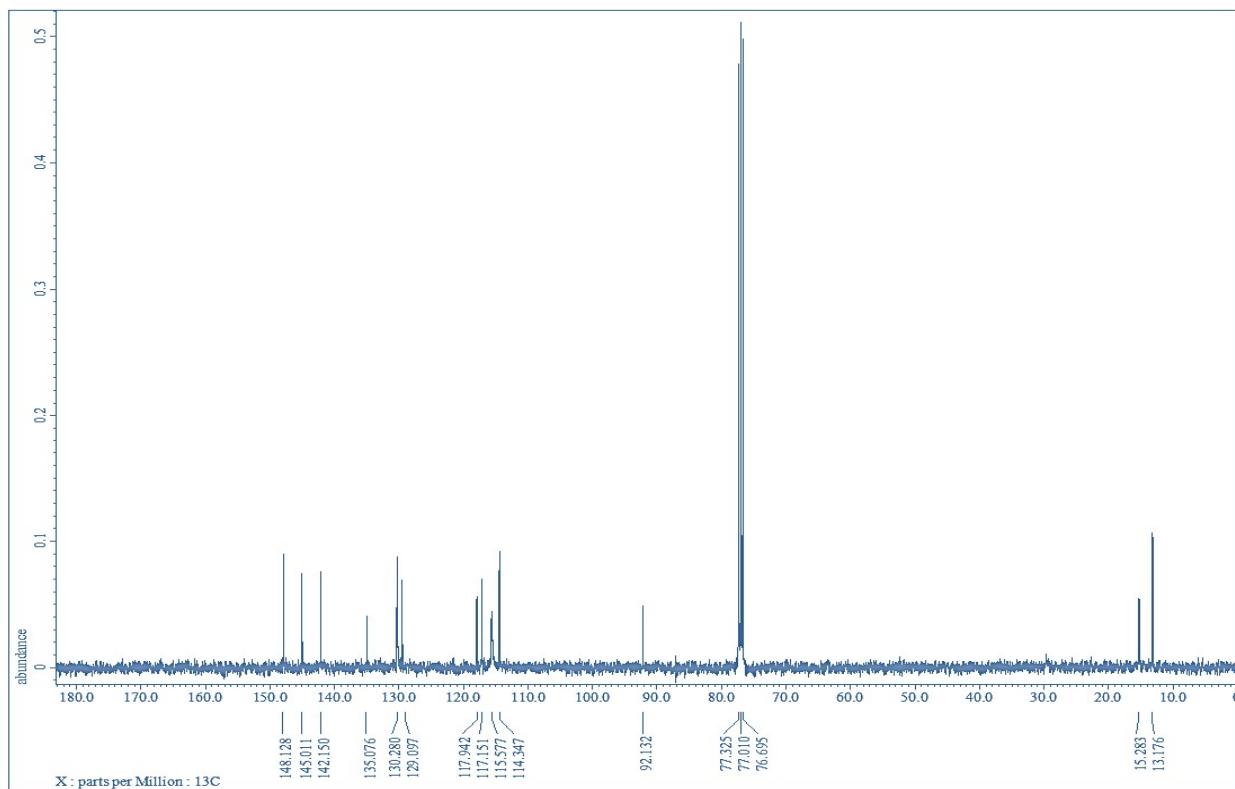

**<sup>1</sup>H NMR and <sup>13</sup>C NMR spectrum of 3-amino-4'-chloro-2-methyl-5-(methylthio)-[1,1'-biphenyl]-4-carbonitrile (7g)**

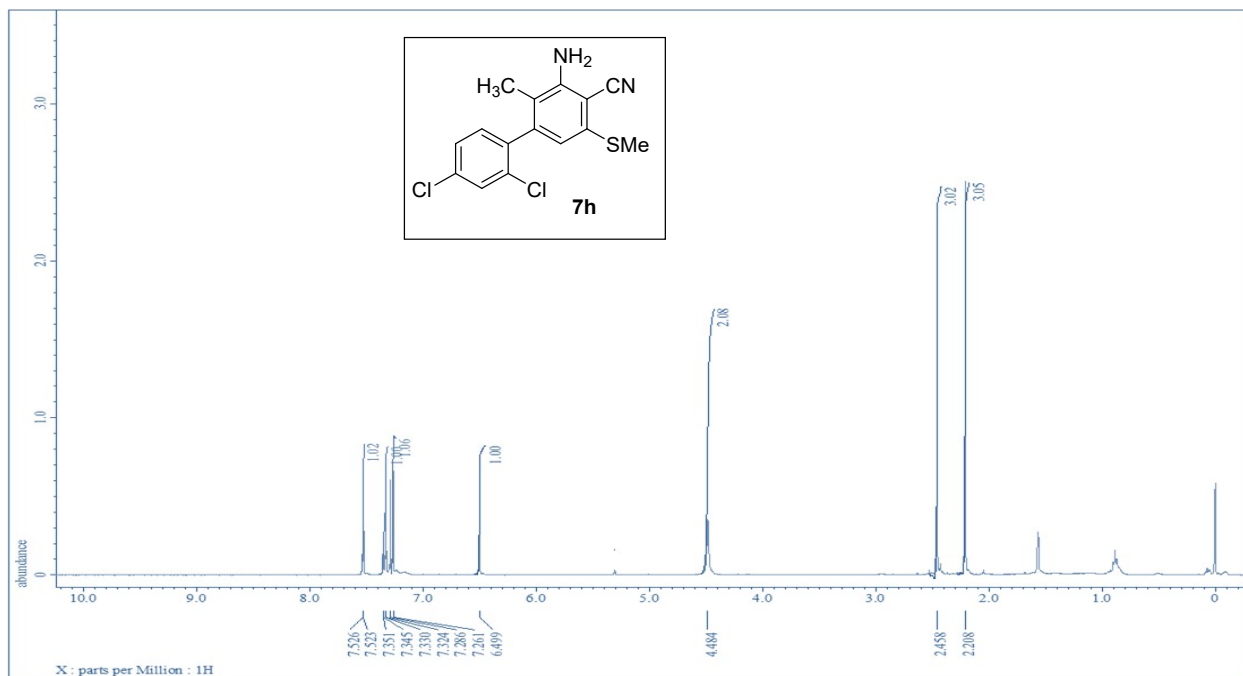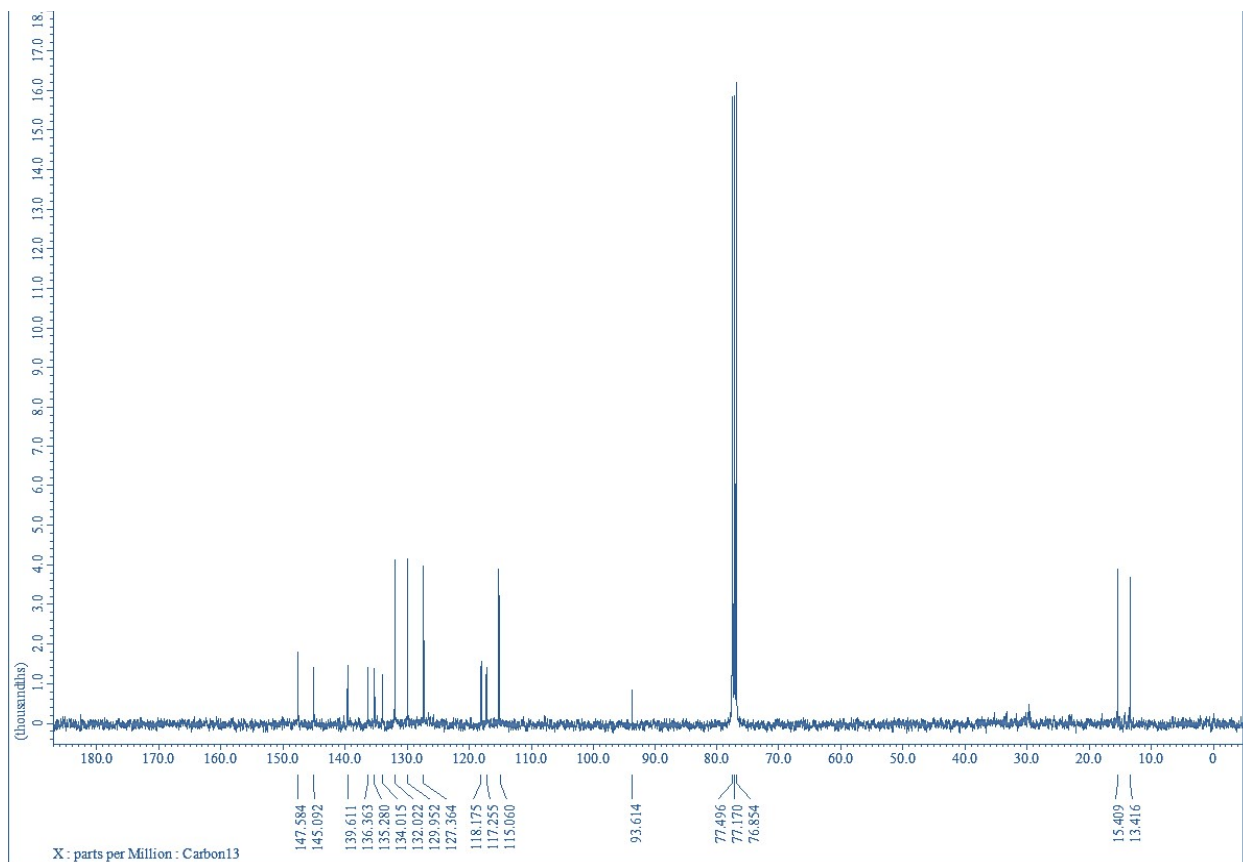

**<sup>1</sup>H NMR and <sup>13</sup>C NMR spectrum of 3-amino-2',4'-dichloro-2-methyl-5-(methylthio)-[1,1'-biphenyl]-4-carbonitrile (7h)**

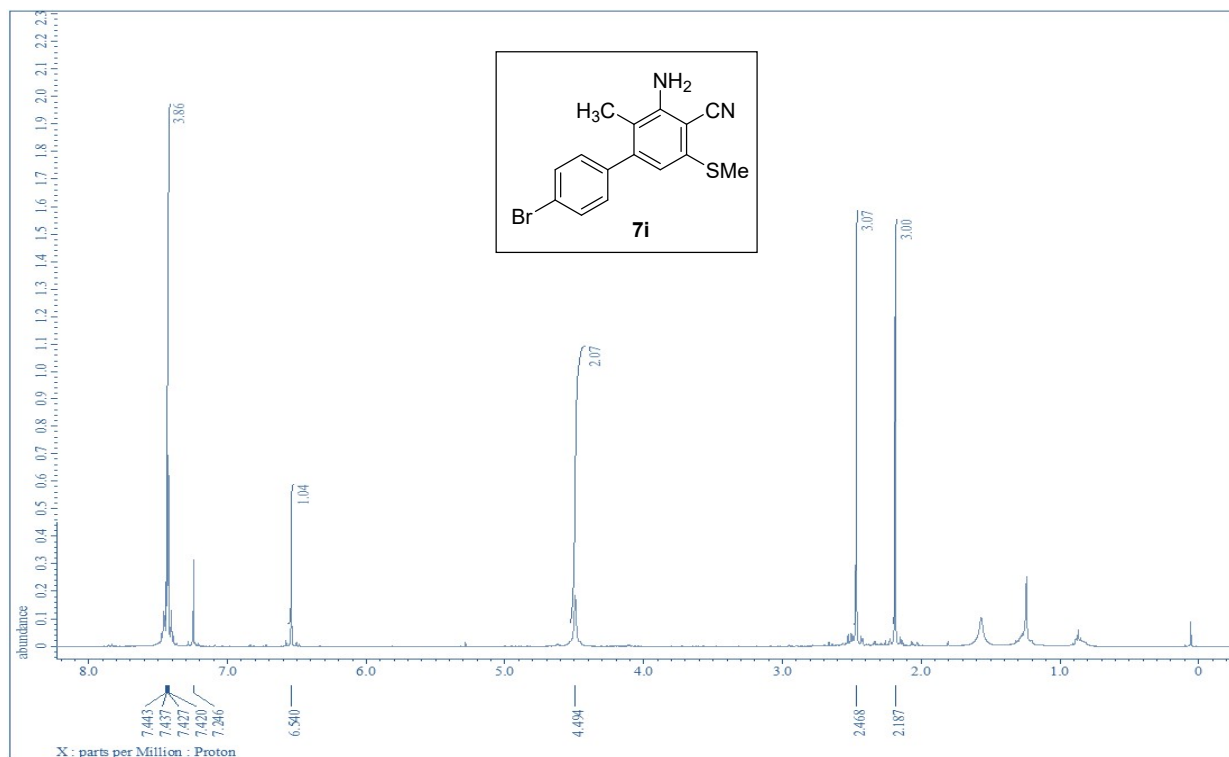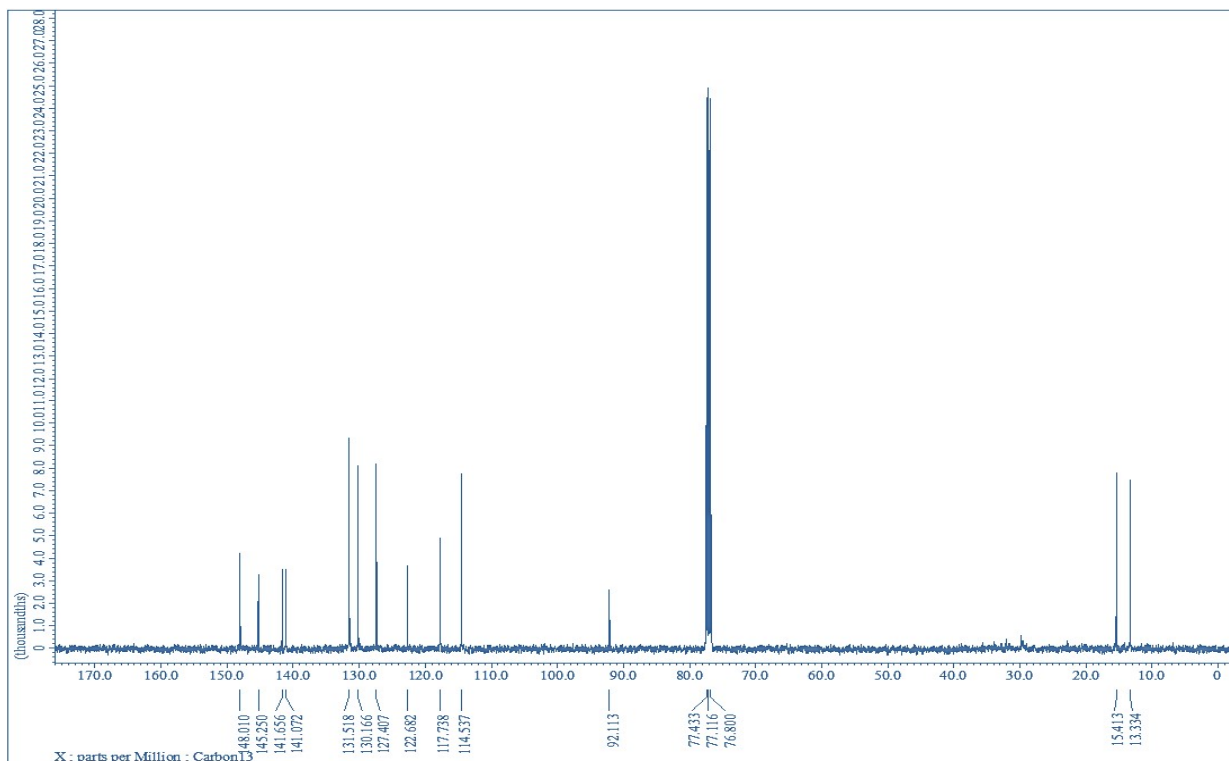

**<sup>1</sup>H NMR and <sup>13</sup>C NMR spectrum of 3-amino-4'-bromo-2-methyl-5-(methylthio)-[1,1'-biphenyl]-4-carbonitrile (7i)**

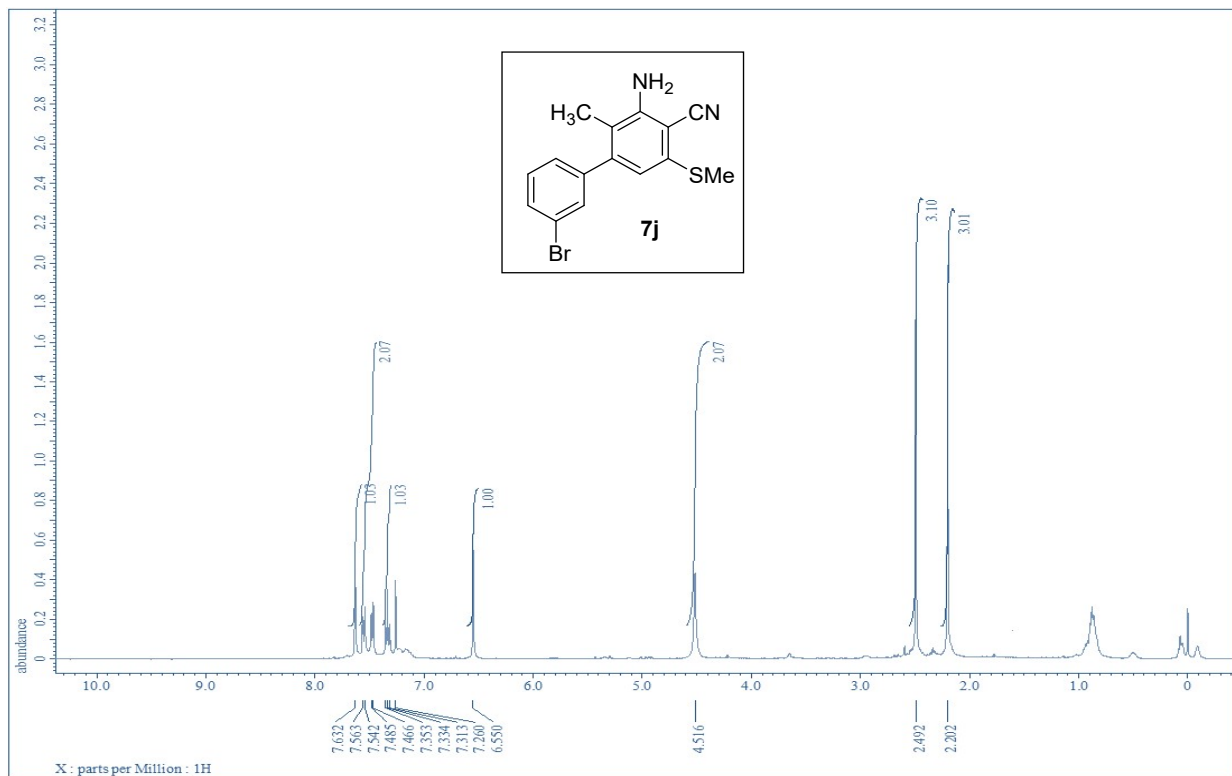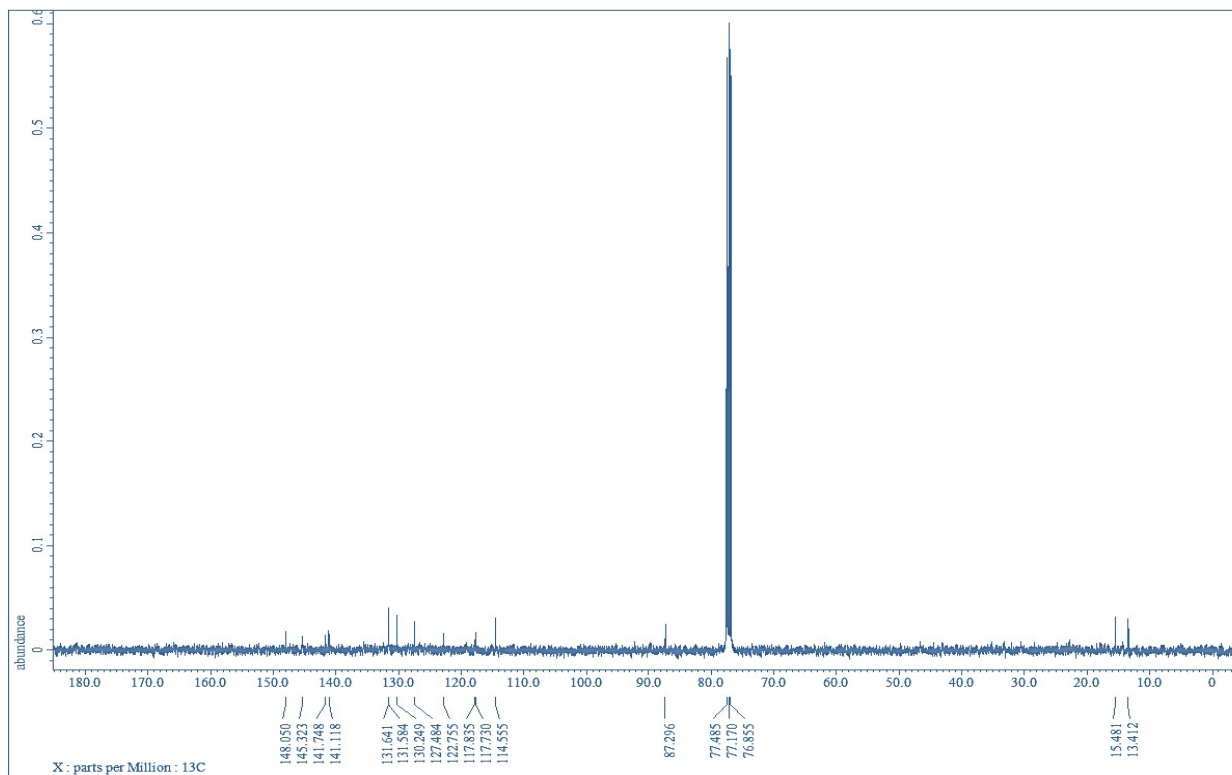

**<sup>1</sup>H NMR and <sup>13</sup>C NMR spectrum of 3-amino-3'-bromo-2-methyl-5-(methylthio)-[1,1'-biphenyl]-4-carbonitrile (7j)**

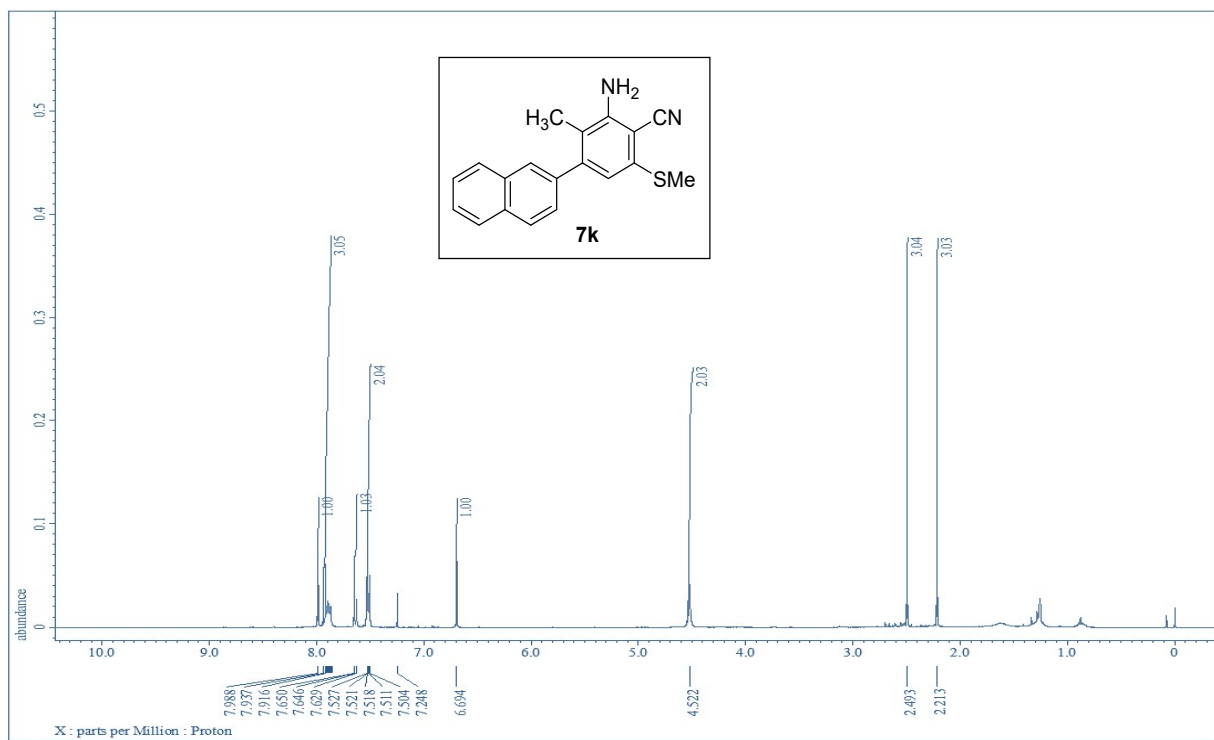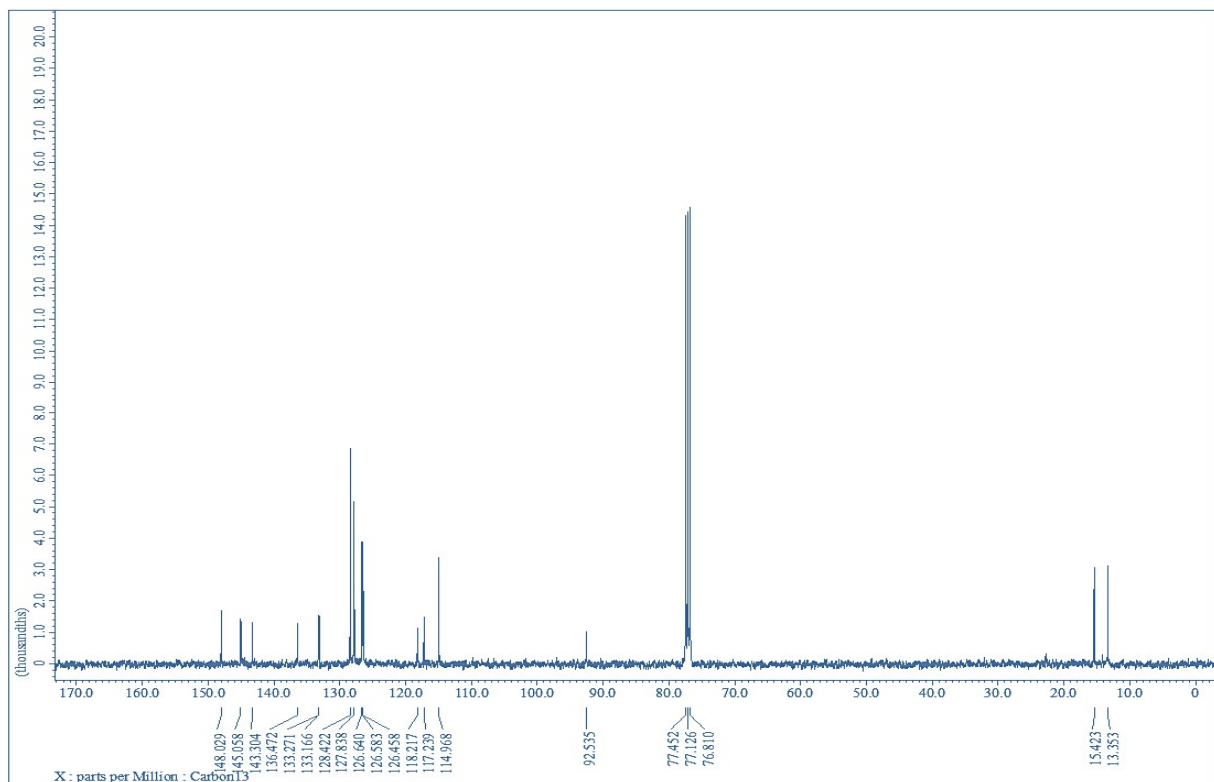

**<sup>1</sup>H NMR and <sup>13</sup>C NMR spectrum of 2-amino-3-methyl-6-(methylthio)-4-(naphthalen-2-yl)benzonitrile (7k)**

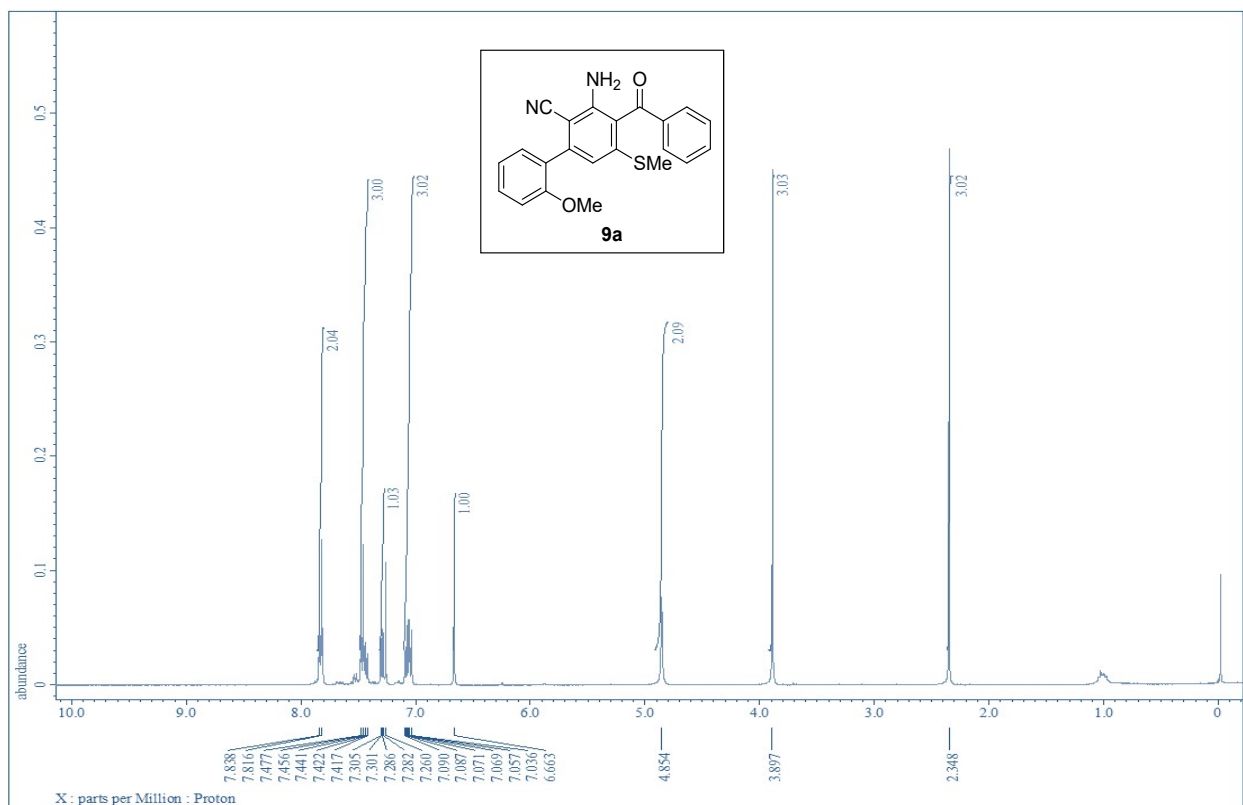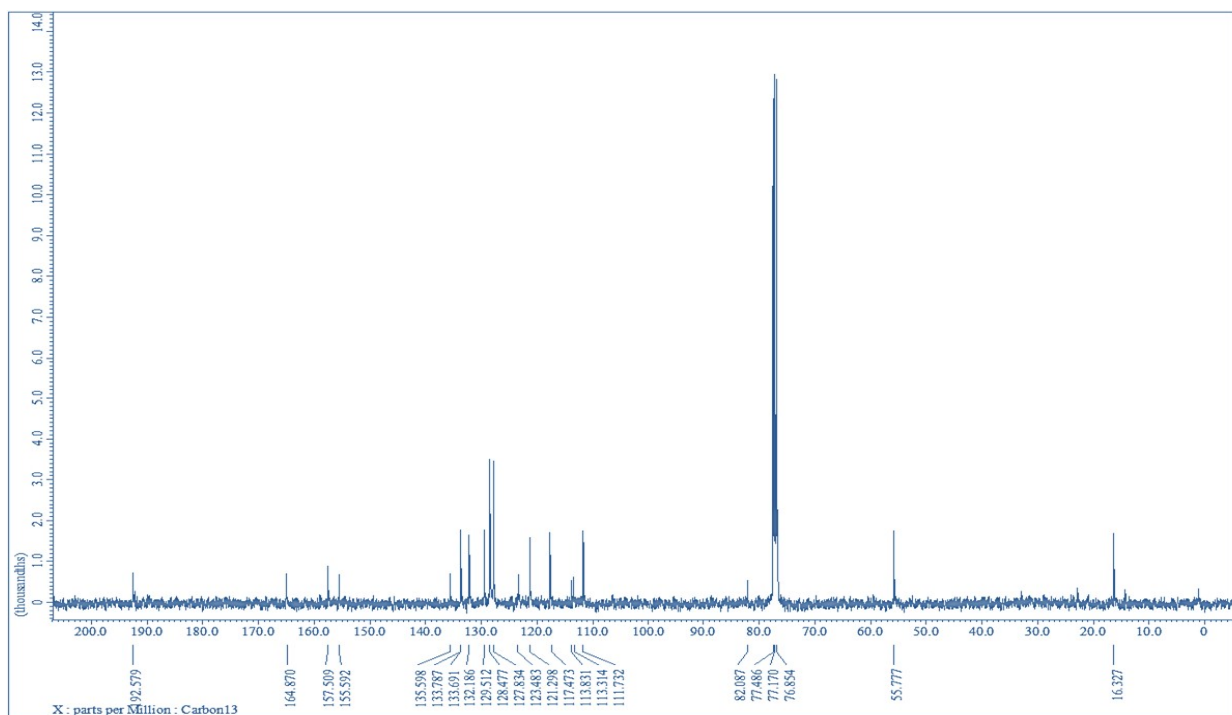

**<sup>1</sup>H NMR and <sup>13</sup>C NMR spectrum of 3-Amino-4-benzoyl-2'-methoxy-5-(methylthio)-[1,1'-biphenyl]-2-carbonitrile (9a)**

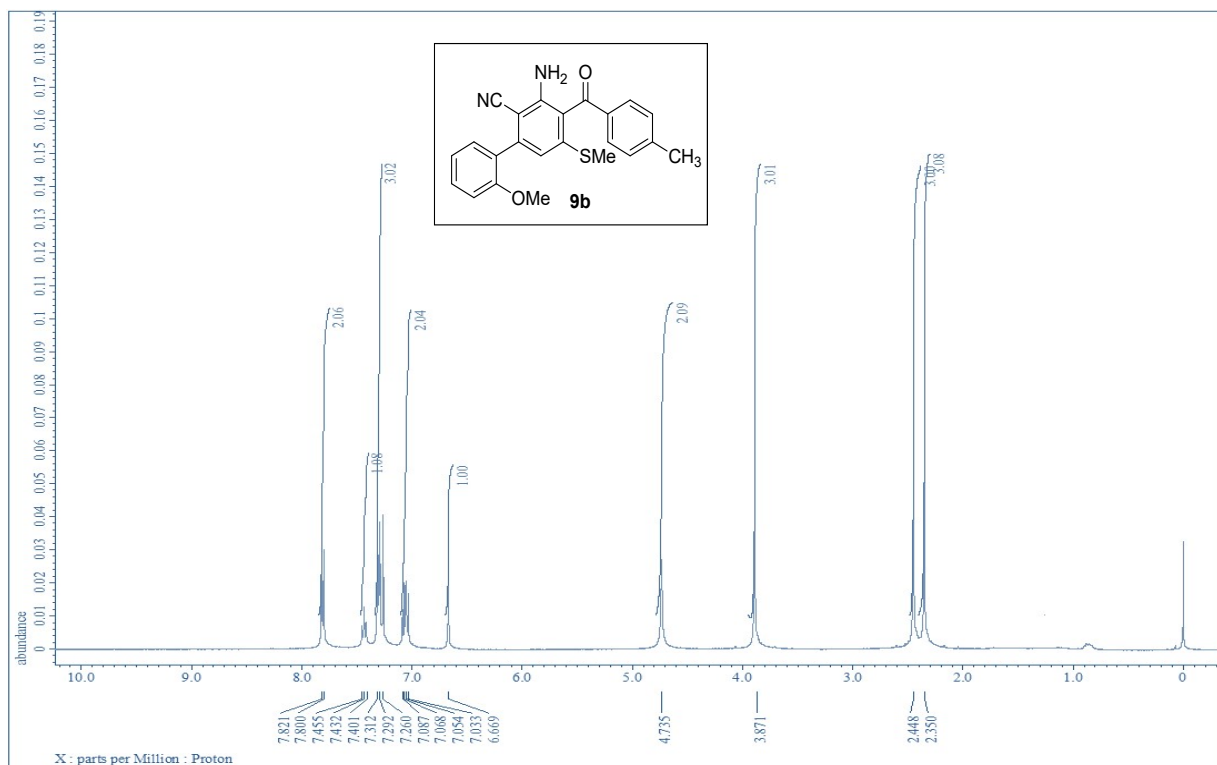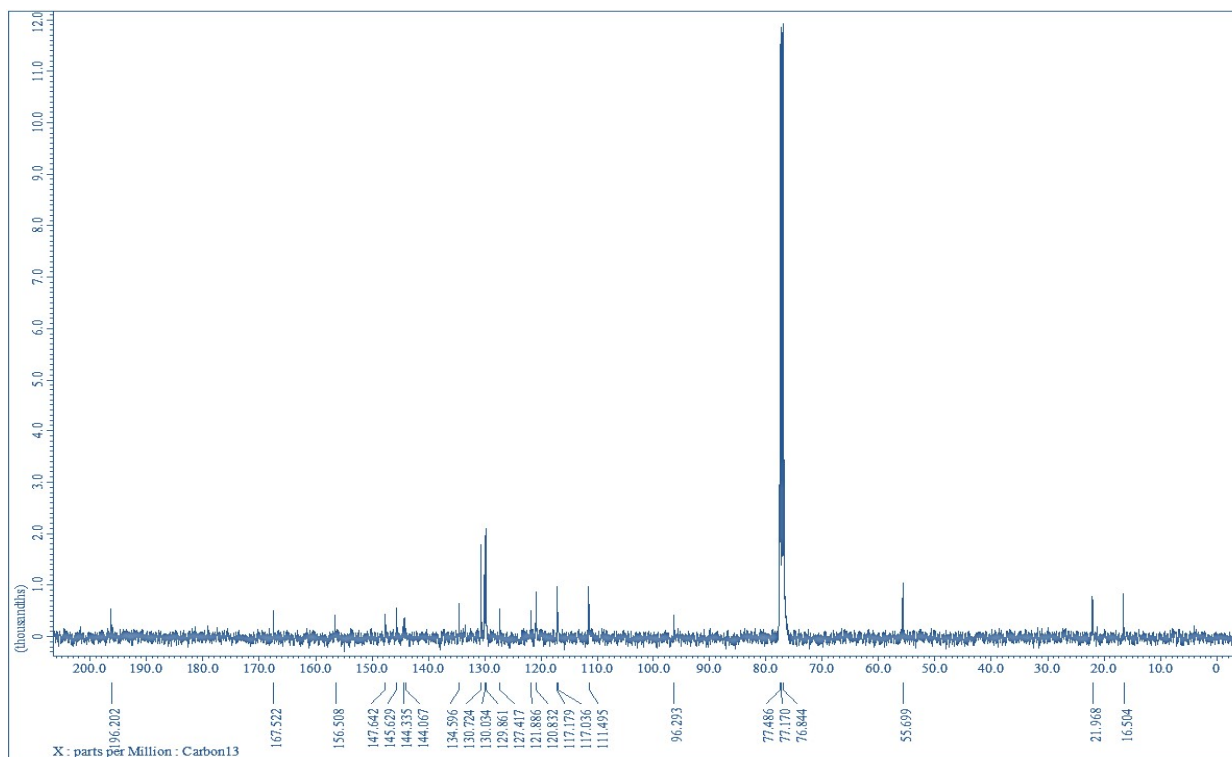

**<sup>1</sup>H NMR and <sup>13</sup>C NMR spectrum of 3-Amino-2'-methoxy-4-(4-methylbenzoyl)-5-(methylthio)-[1,1'-biphenyl]-2-carbonitrile (9b)**

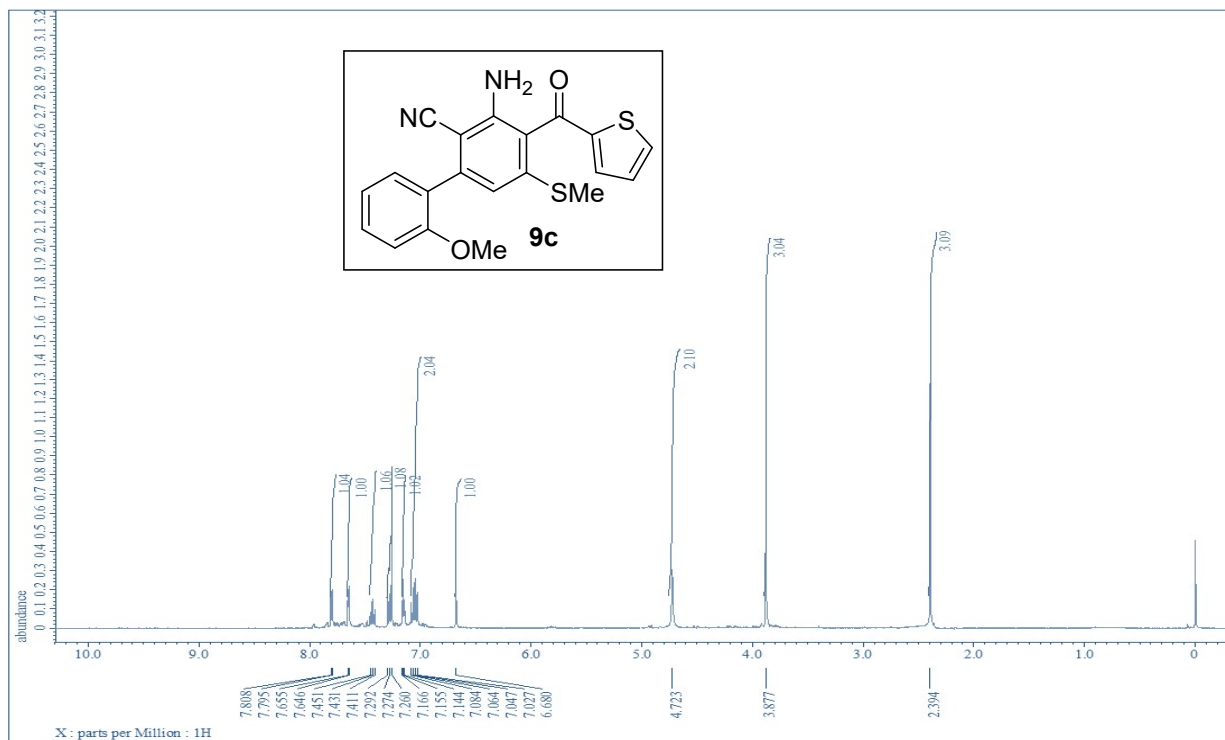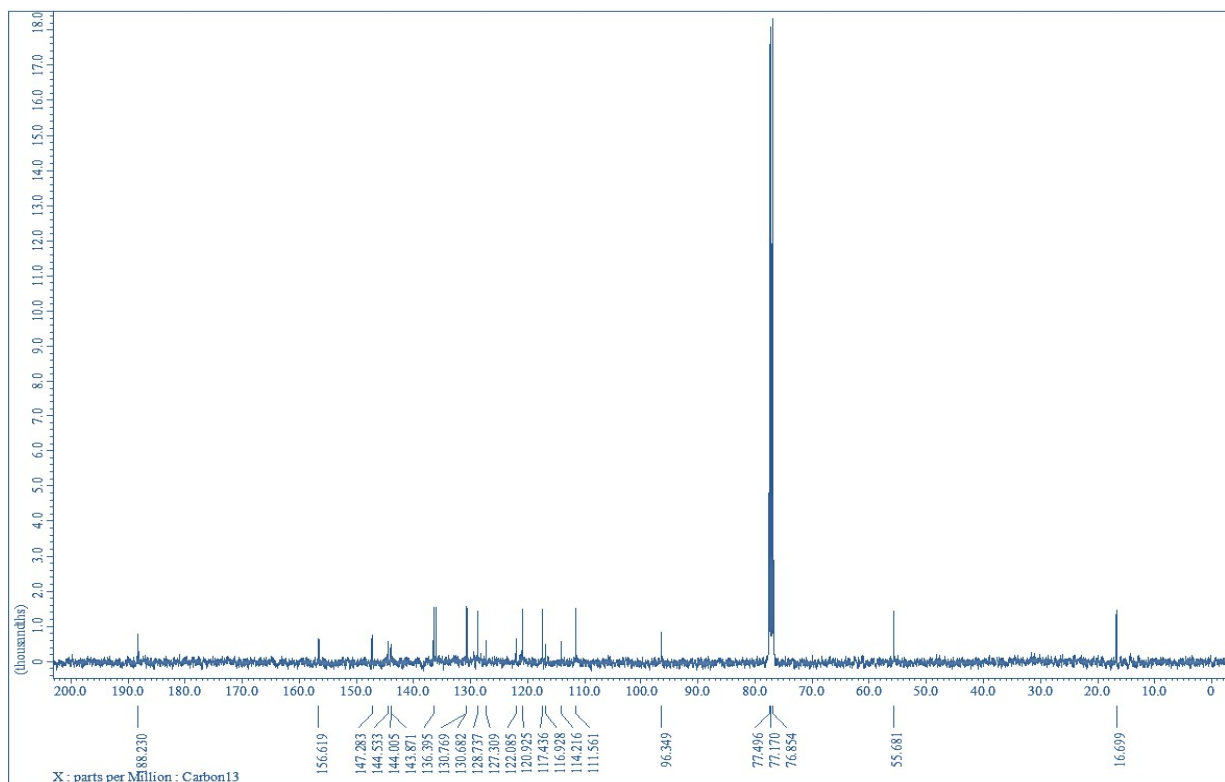

**<sup>1</sup>H NMR and <sup>13</sup>C NMR spectrum of 3-Amino-2'-methoxy-5-(methylthio)-4-(thiophene-2-carbonyl)-[1,1'-biphenyl]-2-carbonitrile (9c)**



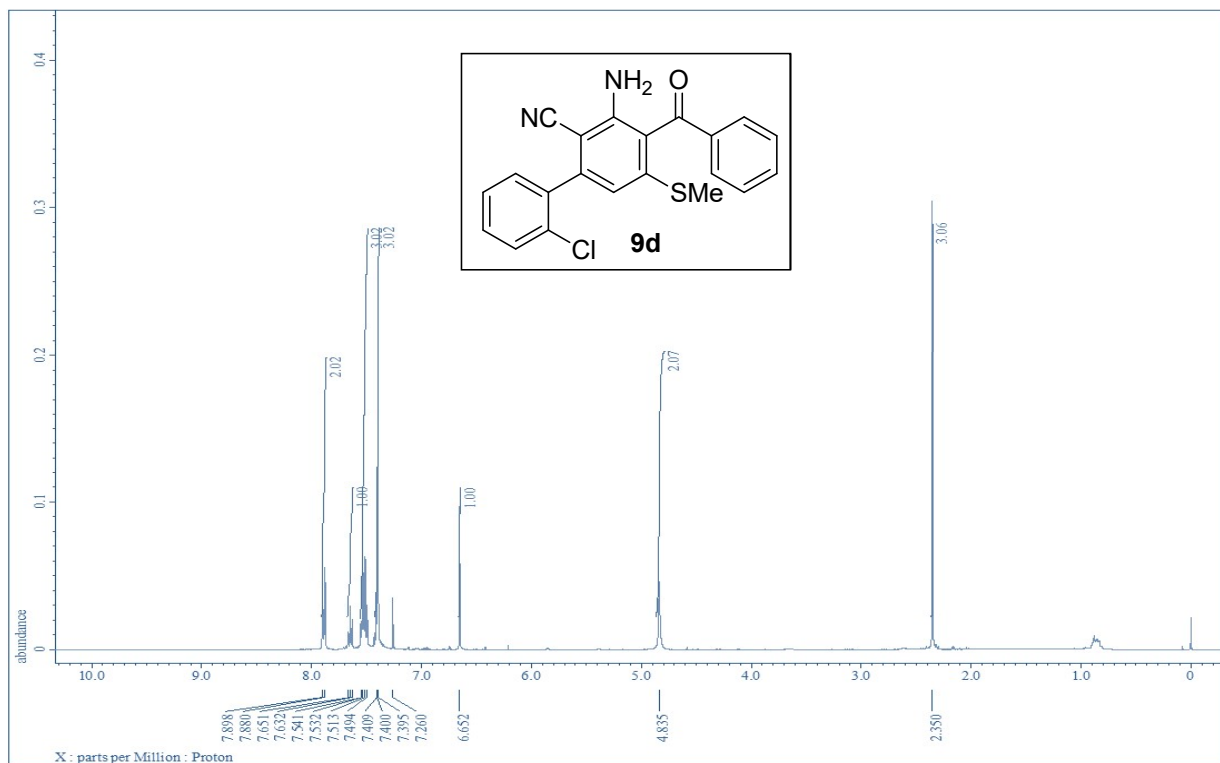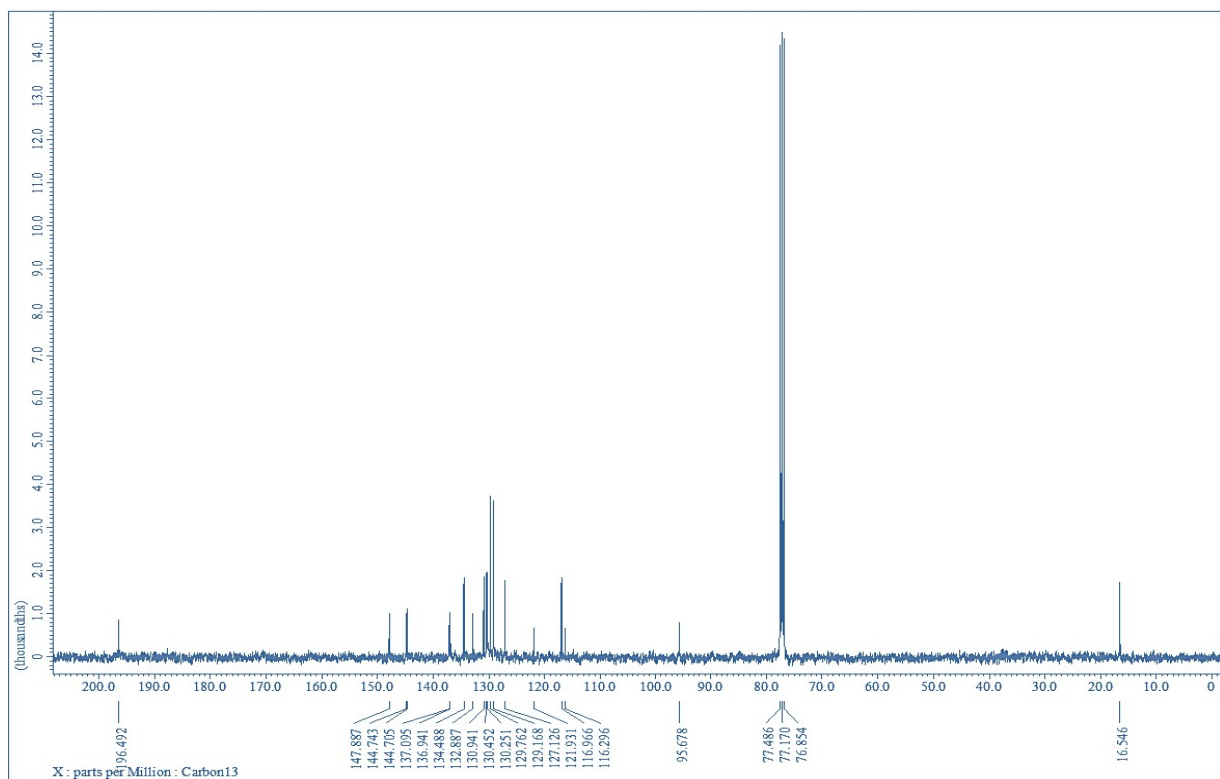

**<sup>1</sup>H NMR and <sup>13</sup>C NMR spectrum of 3-amino-4-benzoyl-2'-chloro-5-(methylthio)-[1,1'-biphenyl]-2-carbonitrile (9d)**

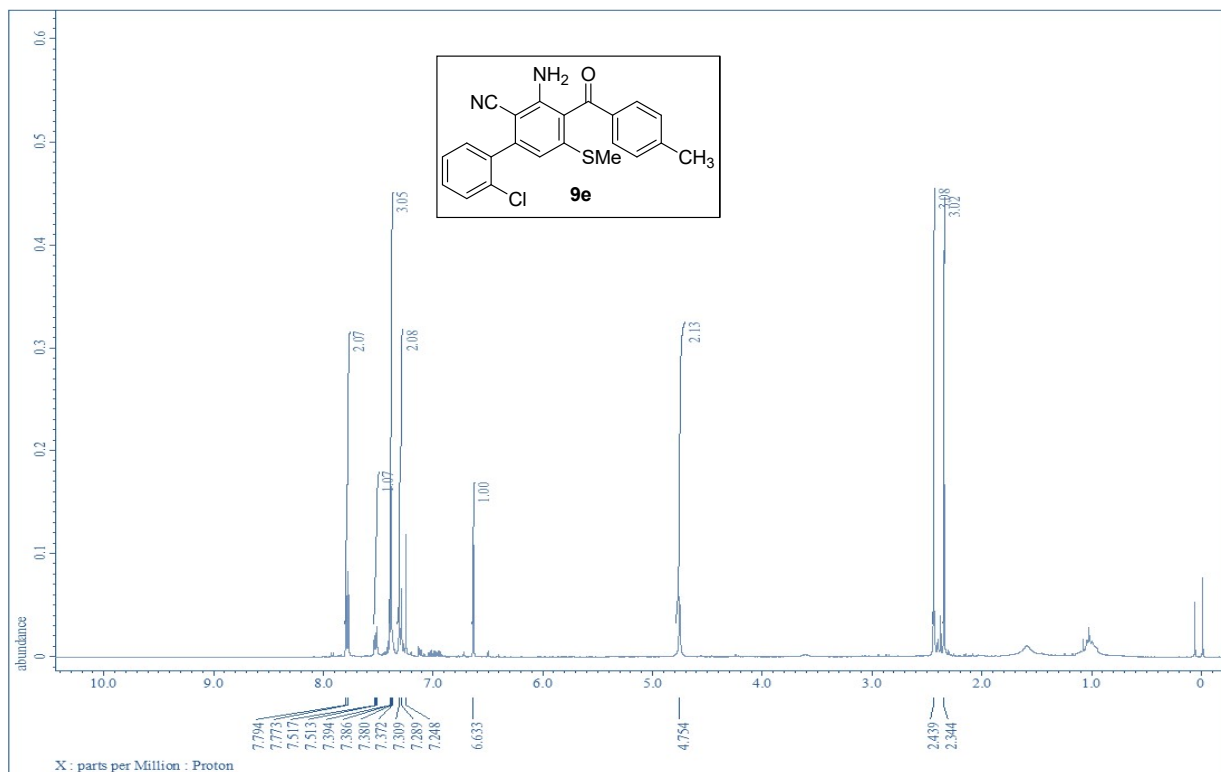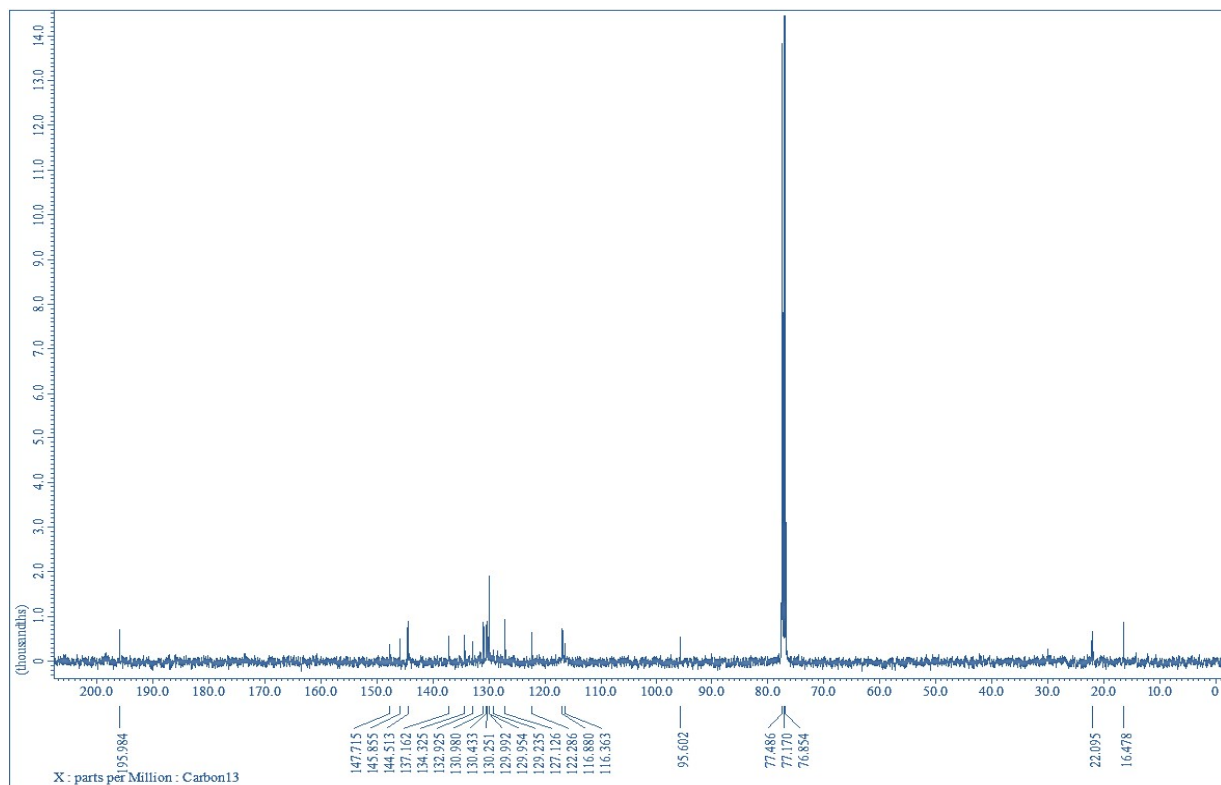

**<sup>1</sup>H NMR and <sup>13</sup>C NMR spectrum of 3-amino-2'-chloro-4-(4-methylbenzoyl)-5-(methylthio)-[1,1'-biphenyl]-2-carbonitrile (9e)**

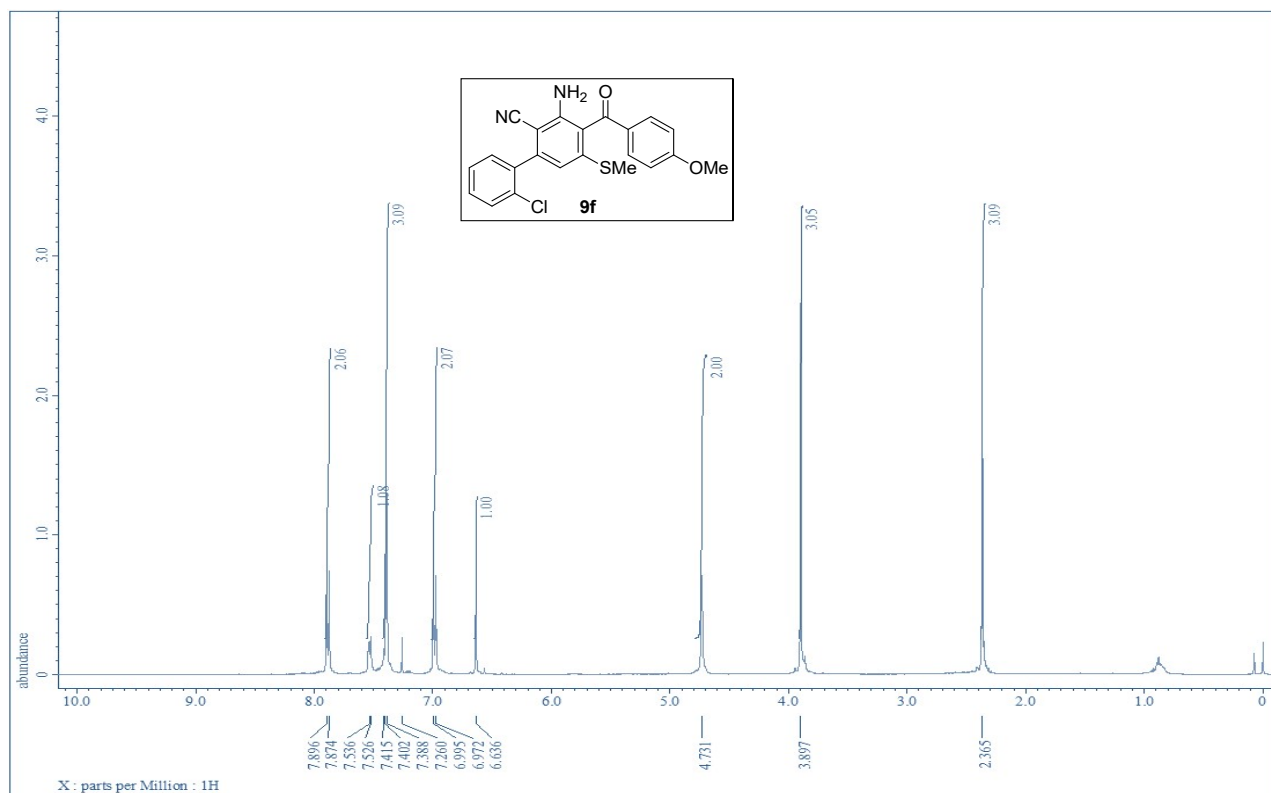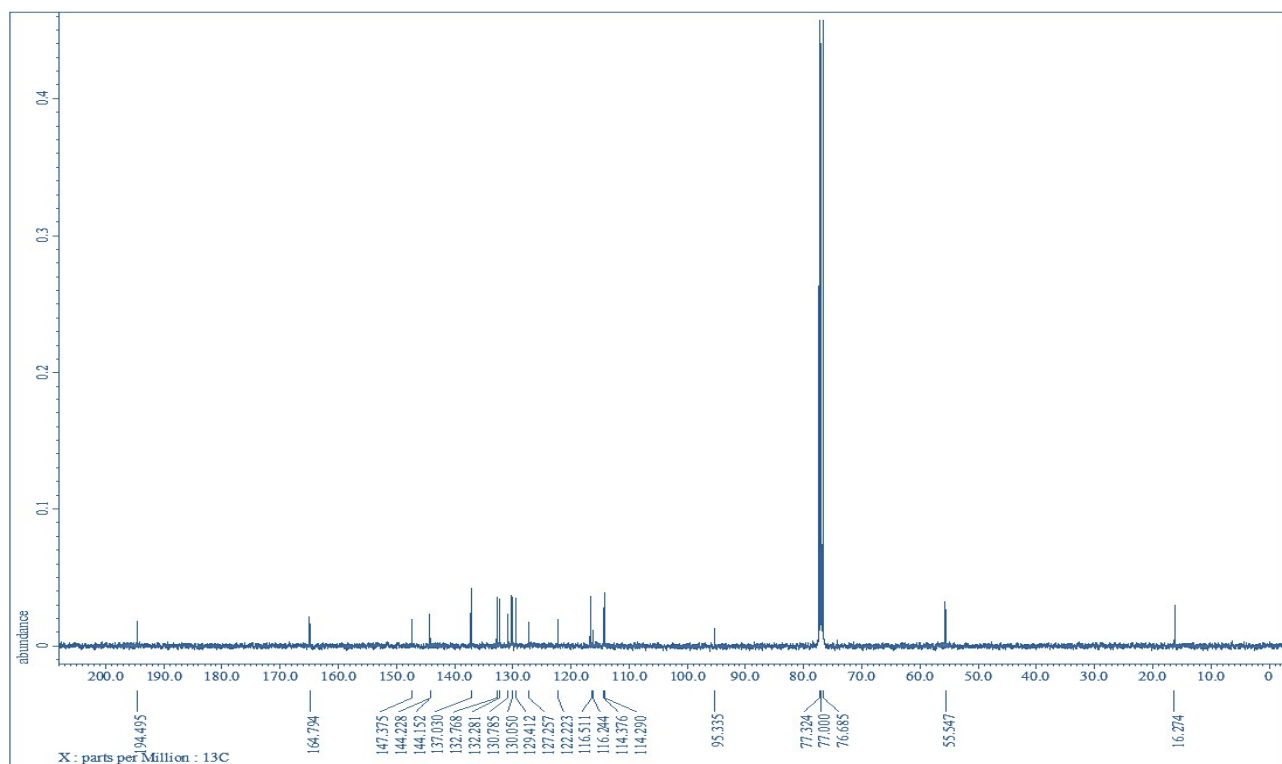

**<sup>1</sup>H NMR and <sup>13</sup>C NMR spectrum of 3-amino-2'-chloro-4-(4-methoxybenzoyl)-5-(methylthio)-[1,1'-biphenyl]-2-carbonitrile (9f)**

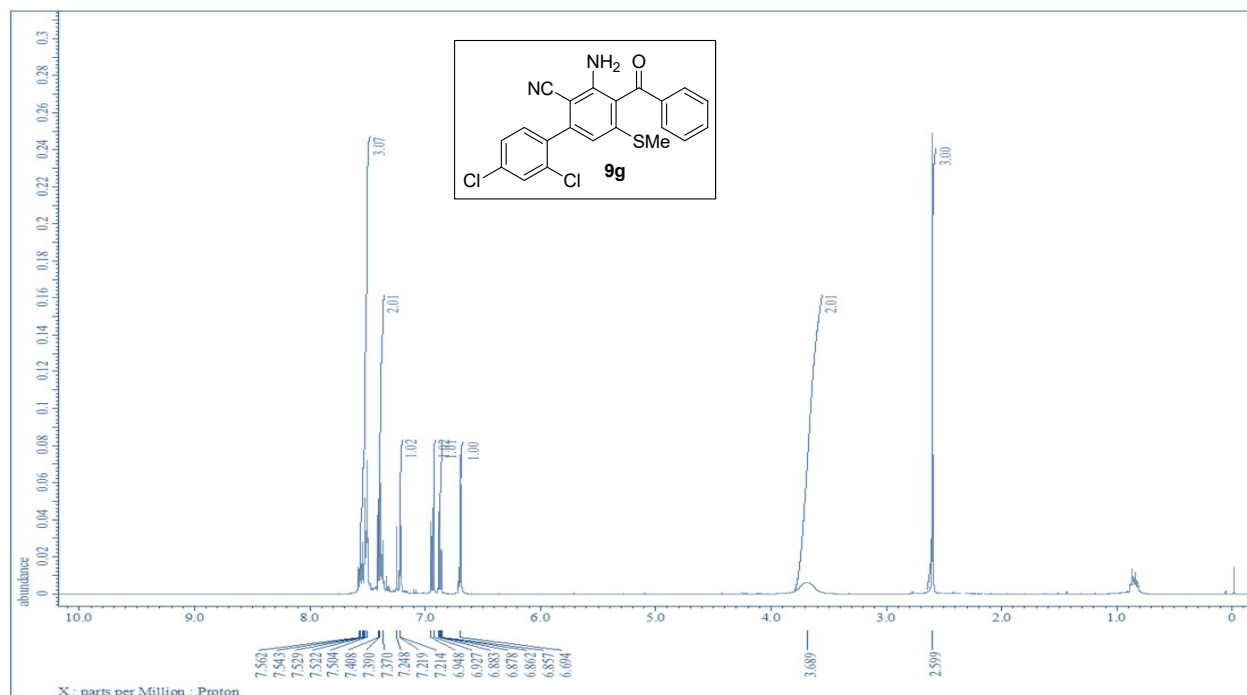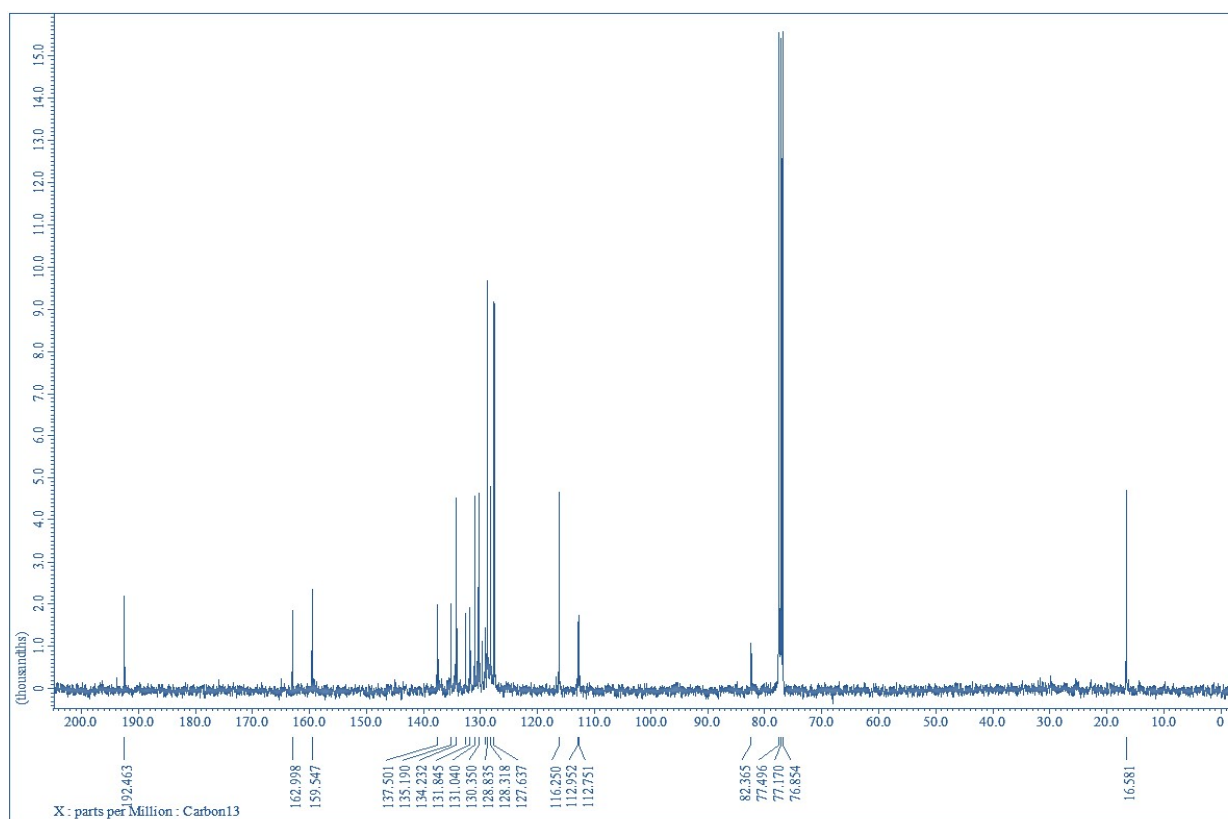

**<sup>1</sup>H NMR and <sup>13</sup>C NMR spectrum of 3-amino-4-benzoyl-2',4'-dichloro-5-(methylthio)-[1,1'-biphenyl]-2-carbonitrile (9g)**

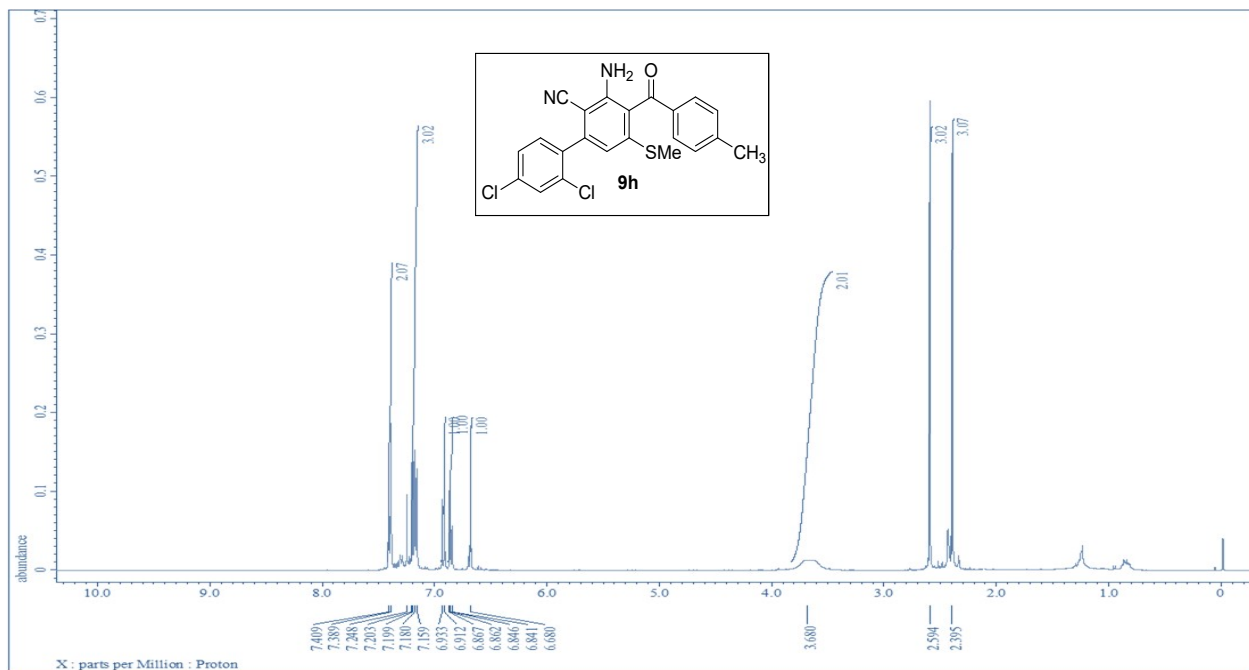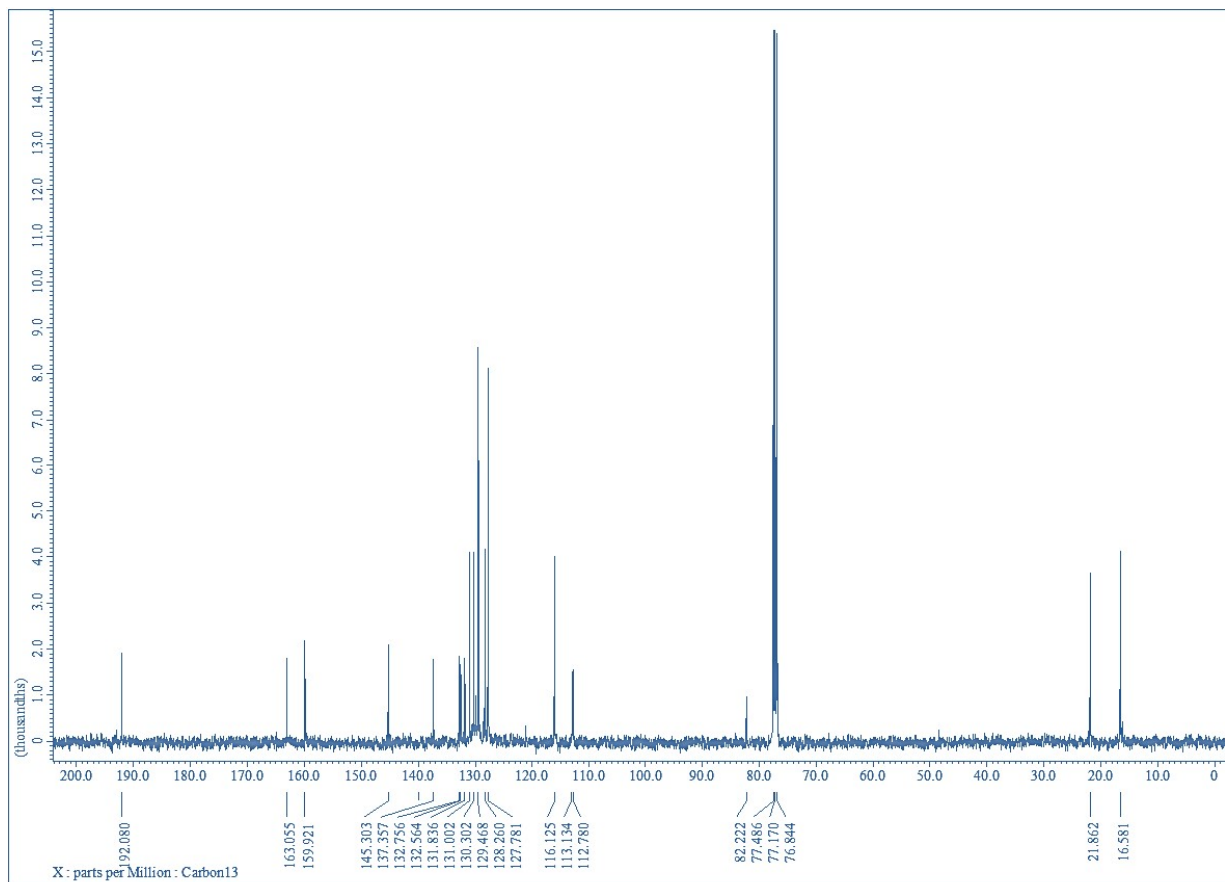

**<sup>1</sup>H NMR and <sup>13</sup>C NMR spectrum of 3-amino-2',4'-dichloro-4-(4-methylbenzoyl)-5-(methylthio)-[1,1'-biphenyl]-2-carbonitrile (9h)**

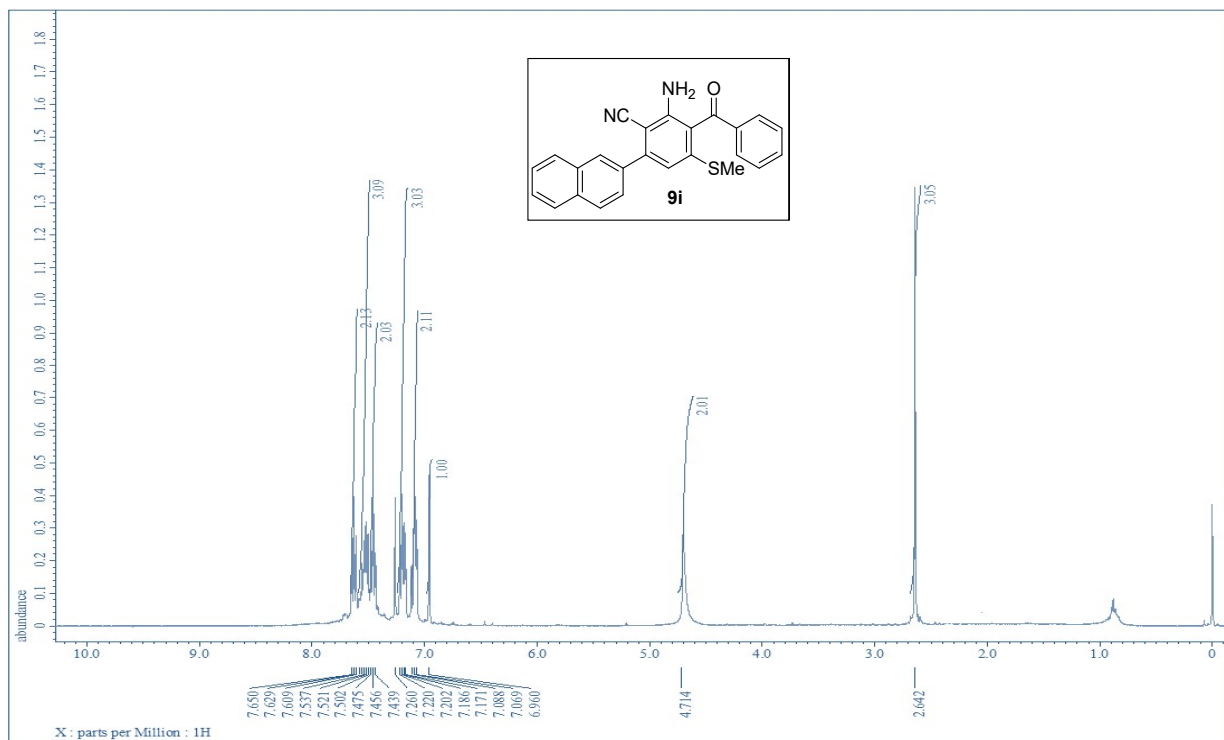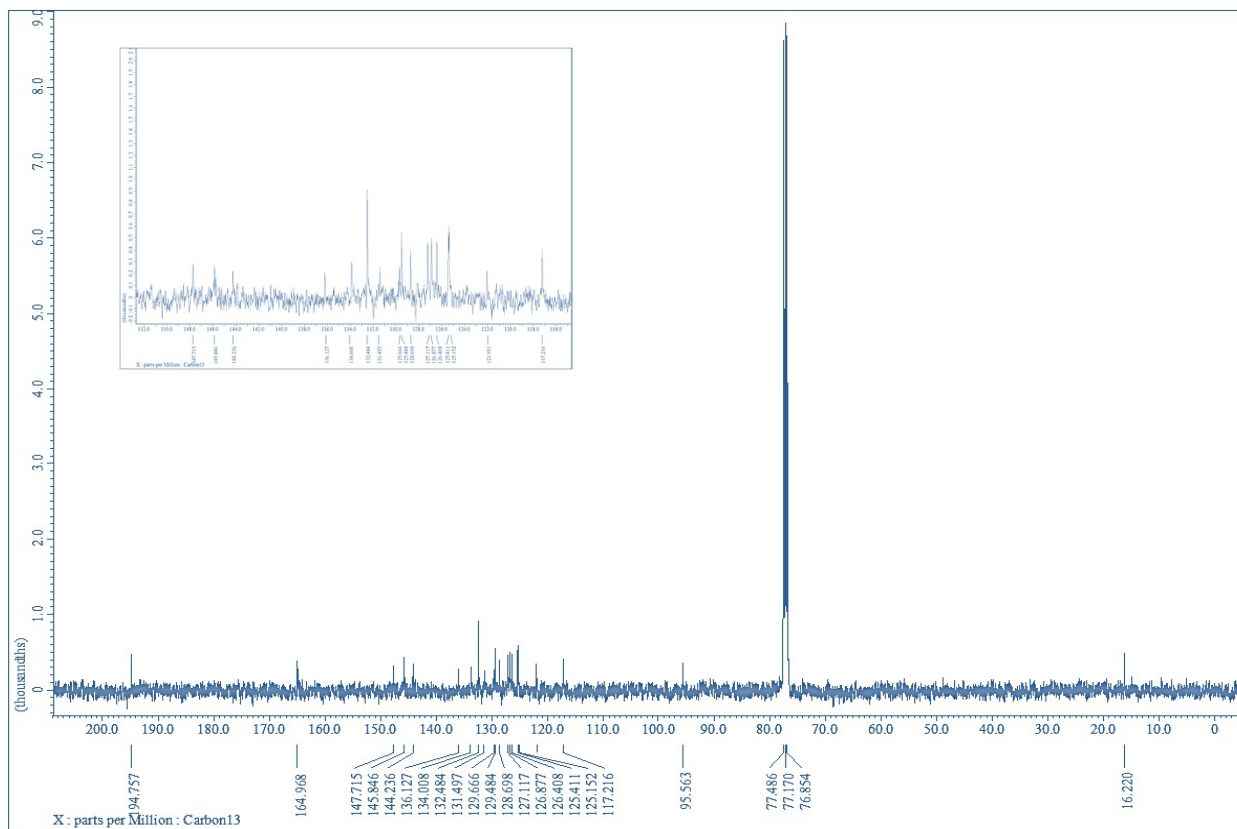

**<sup>1</sup>H NMR and <sup>13</sup>C NMR spectrum of 2-amino-3-(4-methoxybenzoyl)-4-(methylthio)-6-(naphthalen-2-yl)benzotrile (9i)**

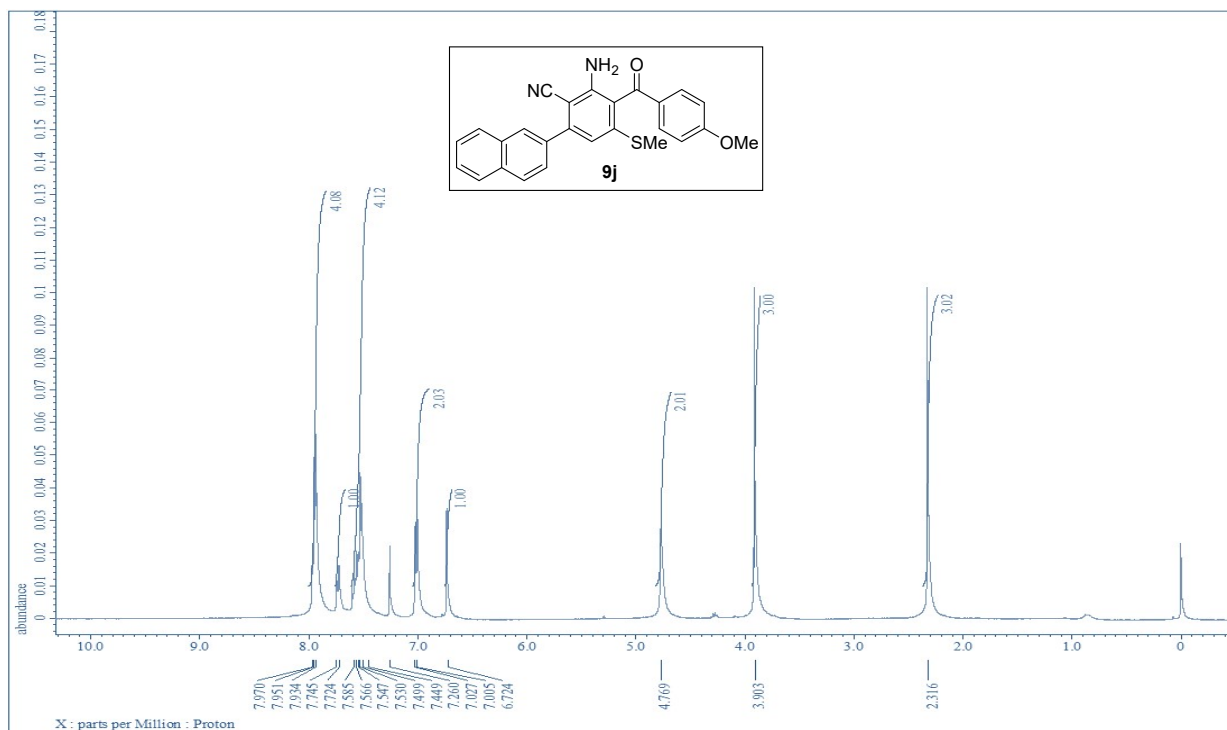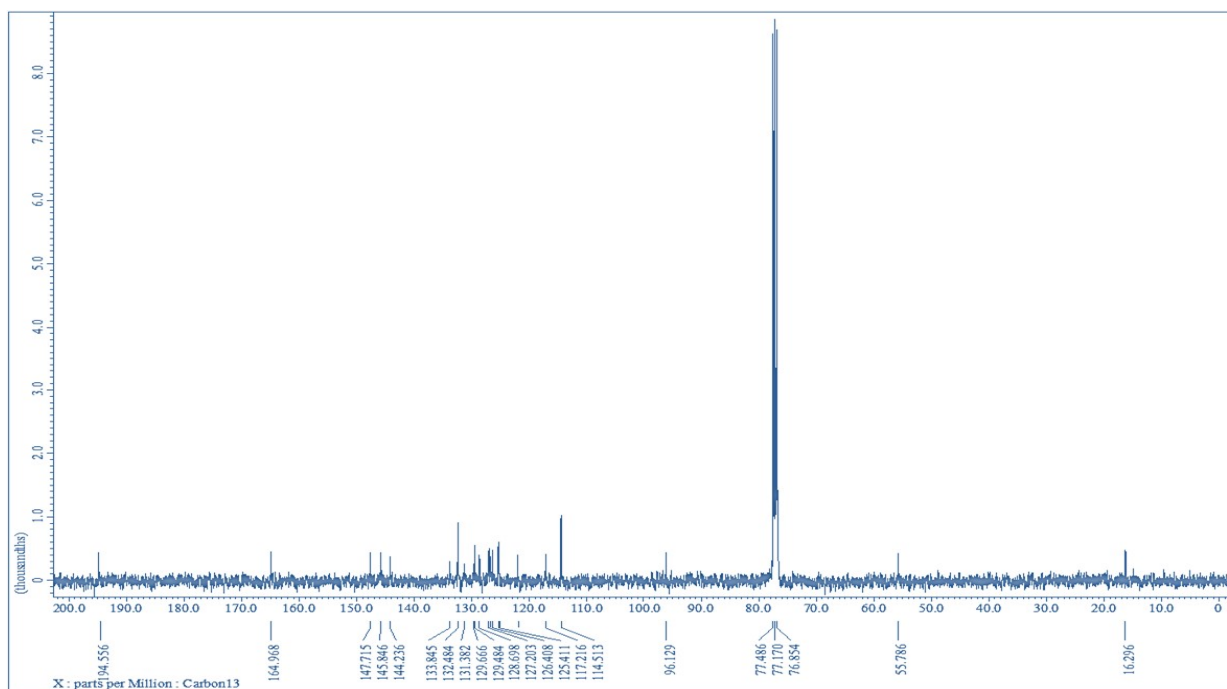

**<sup>1</sup>H NMR and <sup>13</sup>C NMR spectrum of 2-amino-3-(4-methoxybenzoyl)-4-(methylthio)-6-(naphthalen-2-yl)benzonitrile (9j)**

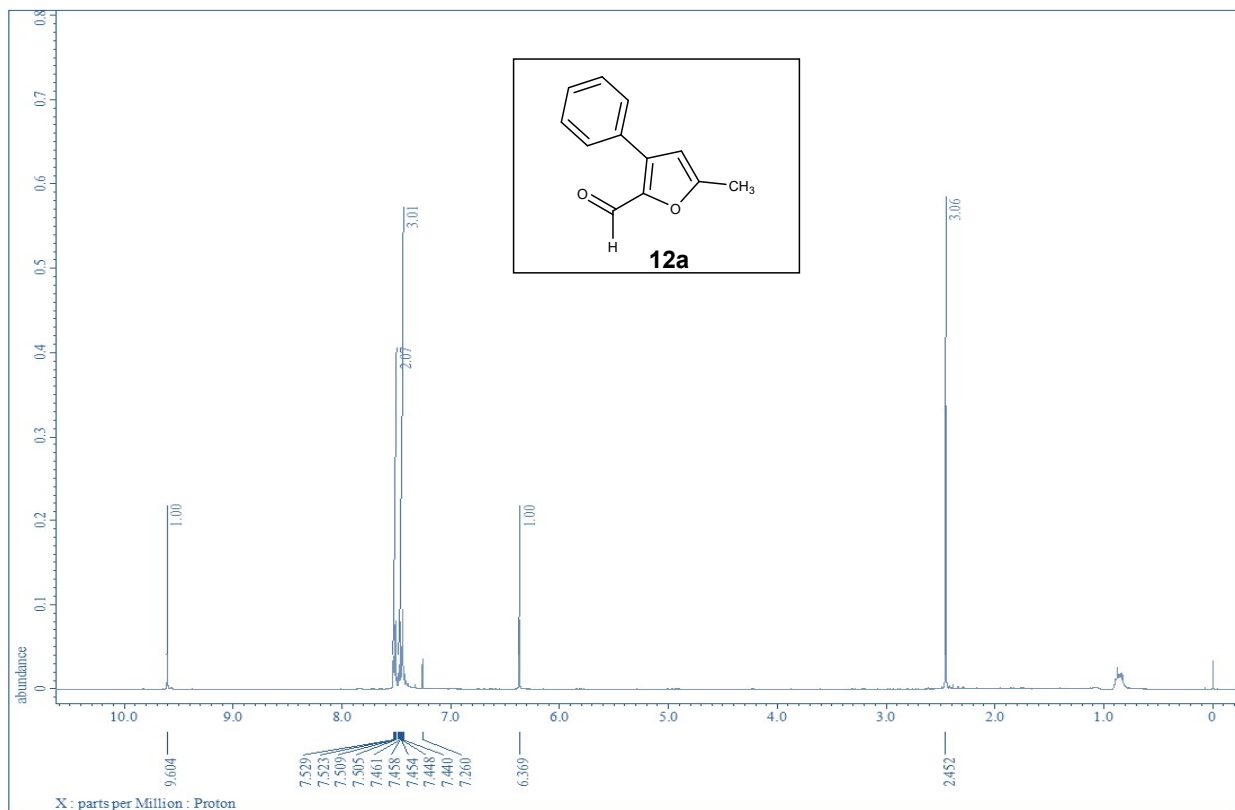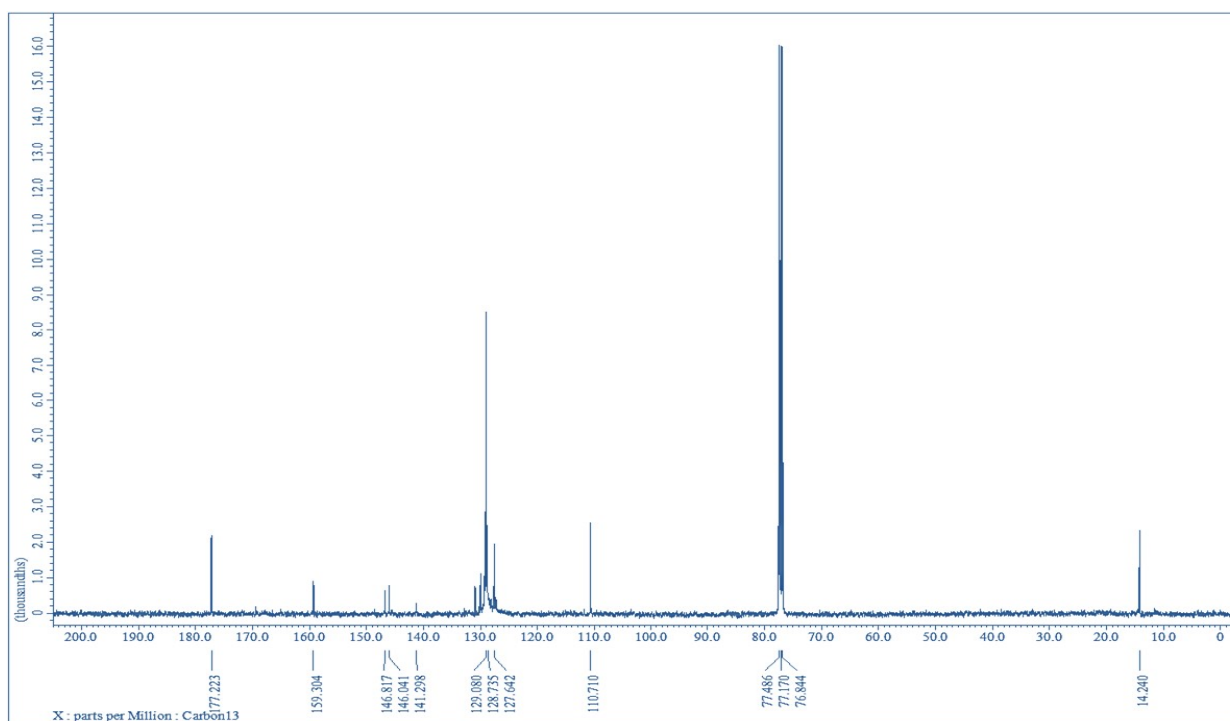

<sup>1</sup>H NMR and <sup>13</sup>C NMR spectrum of 5-methyl-3-phenylfuran-2-carbaldehyde (**12a**)



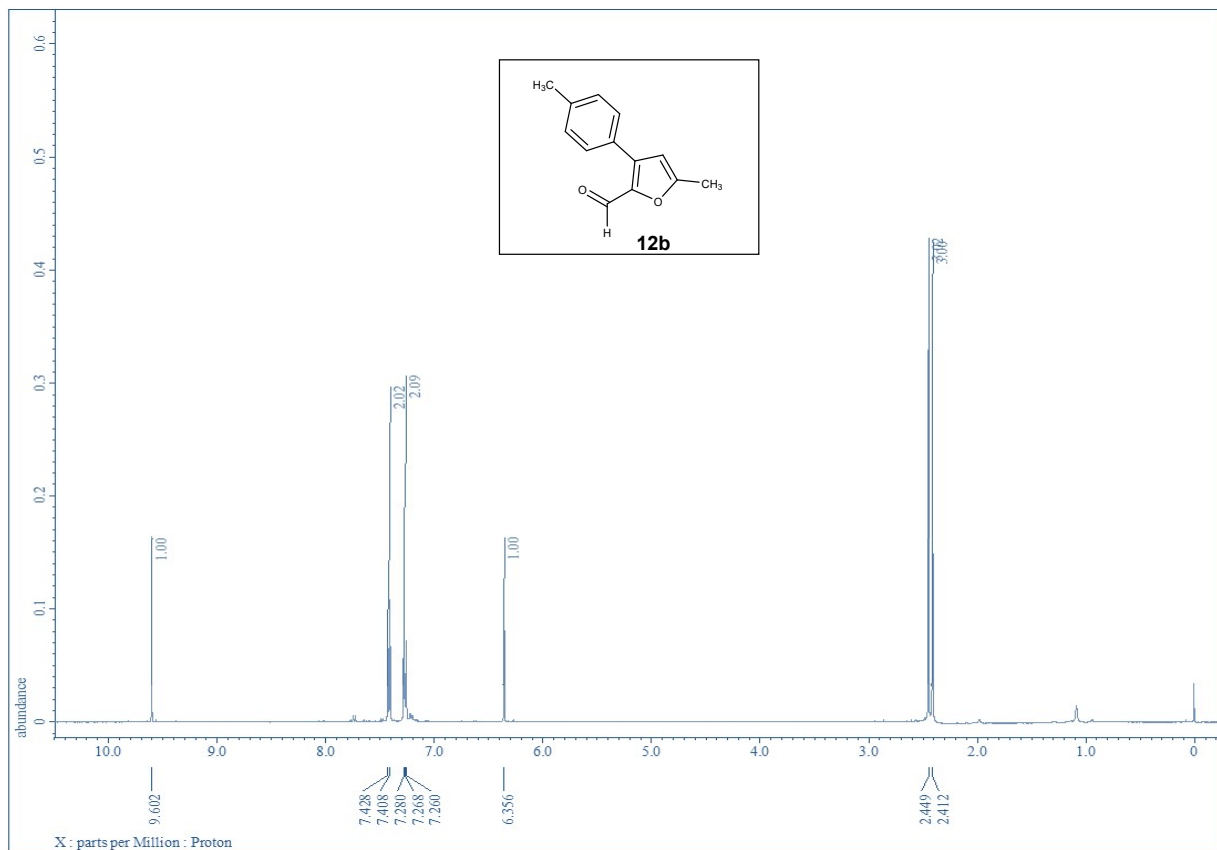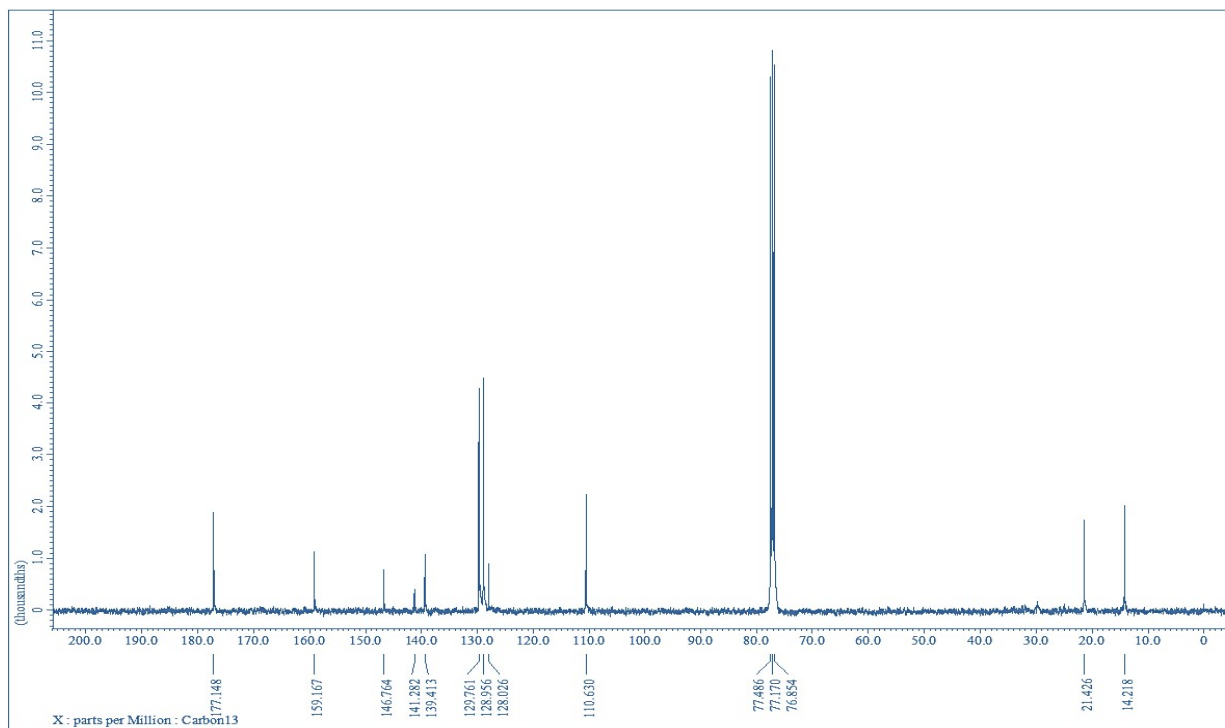

<sup>1</sup>H NMR and <sup>13</sup>C NMR spectrum of 5-methyl-3-(*p*-tolyl)furan-2-carbaldehyde (**12b**)

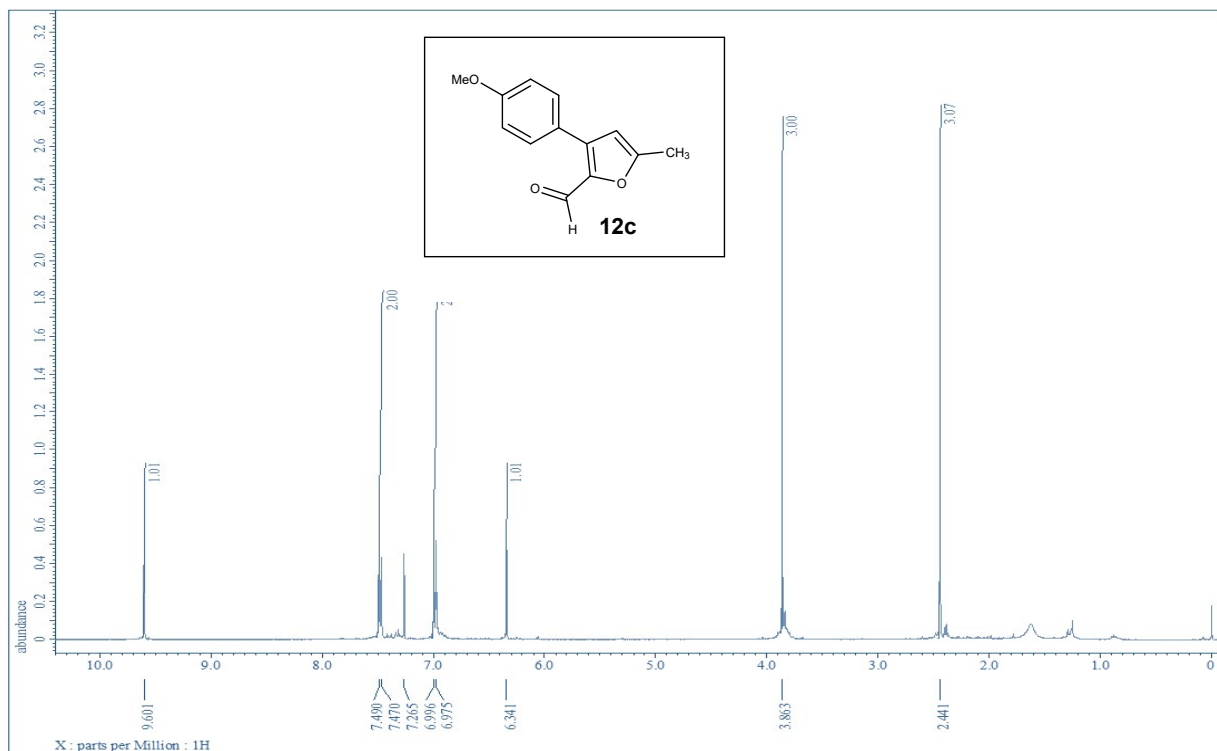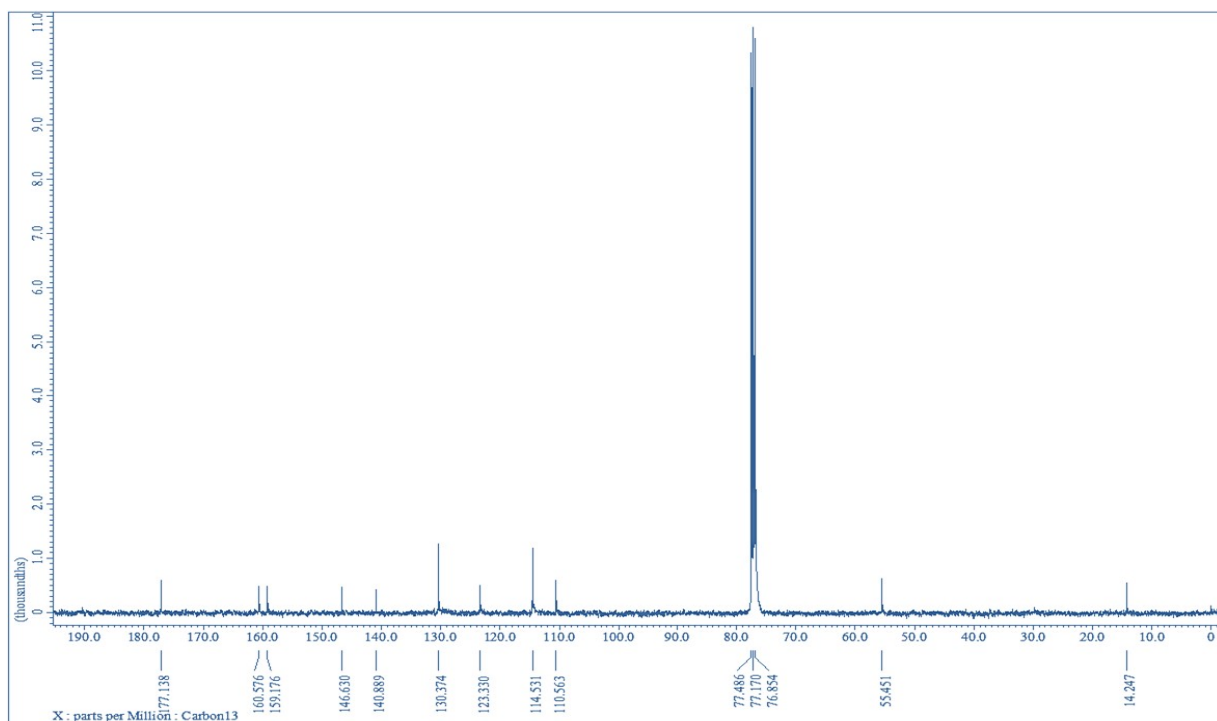

<sup>1</sup>H NMR and <sup>13</sup>C NMR spectrum of 3-(4-methoxyphenyl)-5-methylfuran-2-carbaldehyde (**12c**)

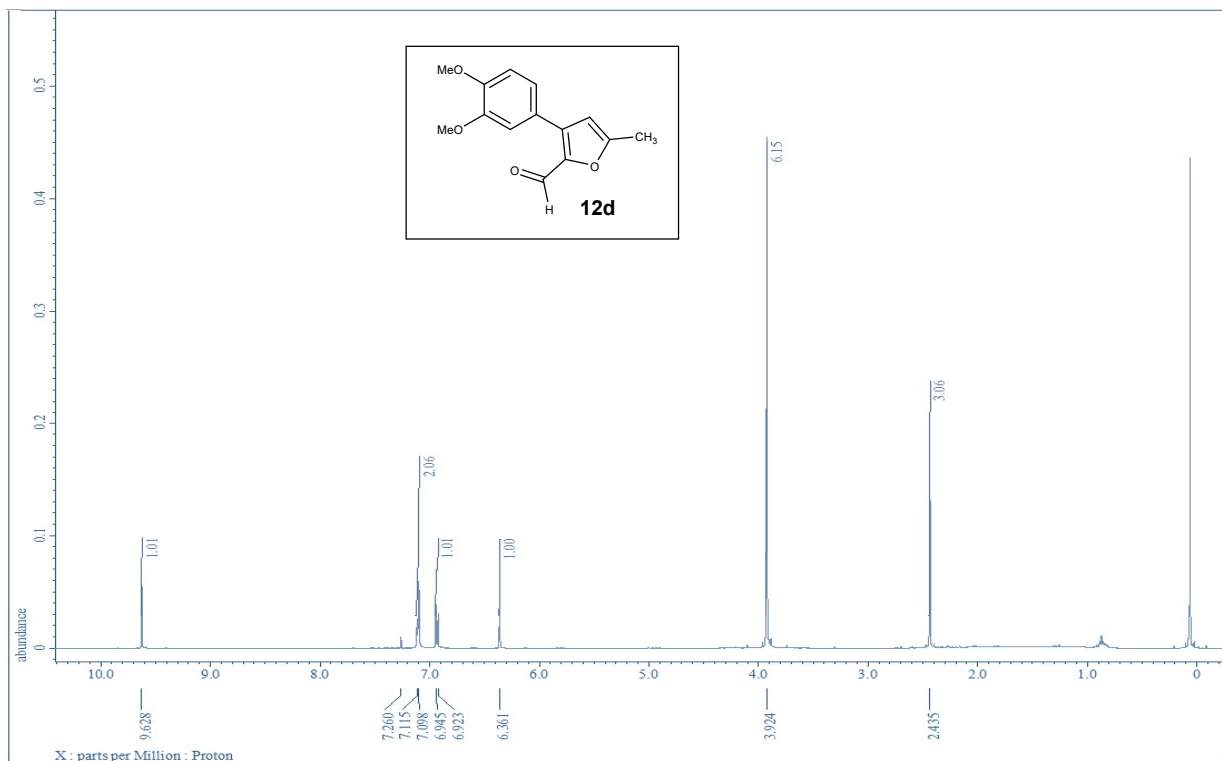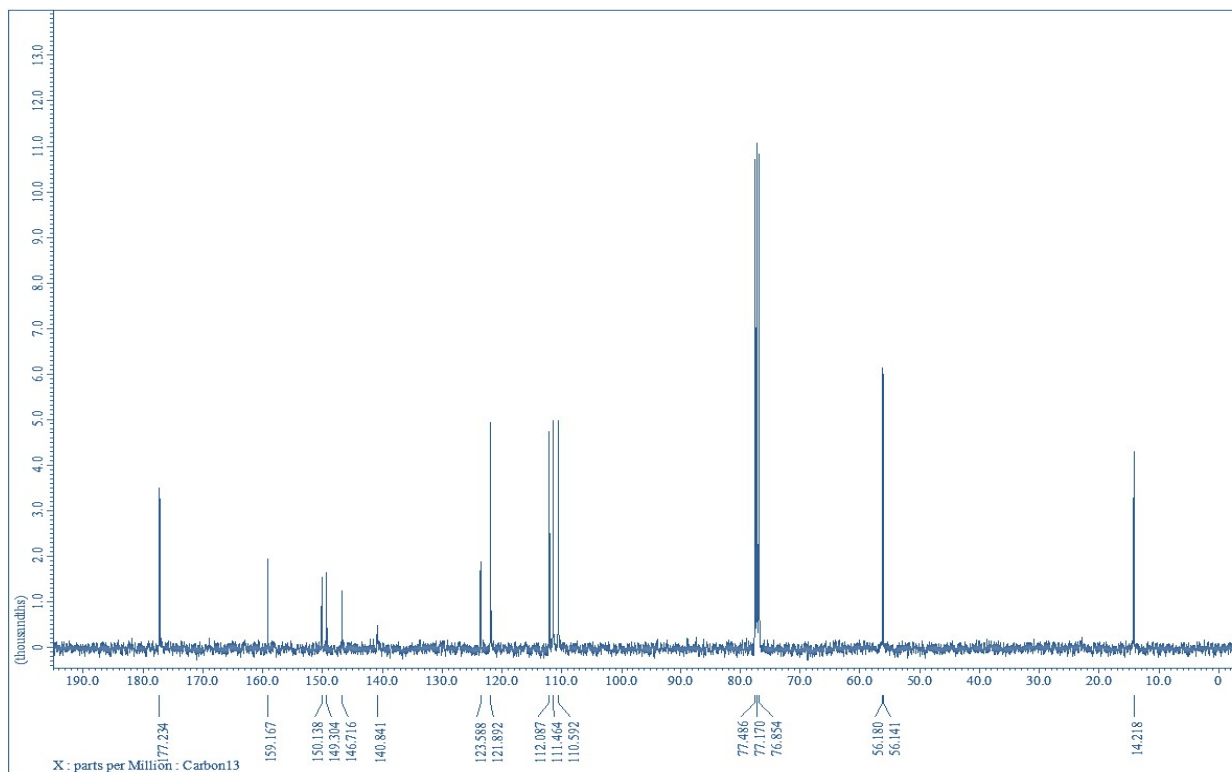

**$^1\text{H NMR}$  and  $^{13}\text{C NMR}$  spectrum of 2-(3,4-dimethoxyphenyl)-5-methylfuran-3-carbaldehyde (**12d**)**

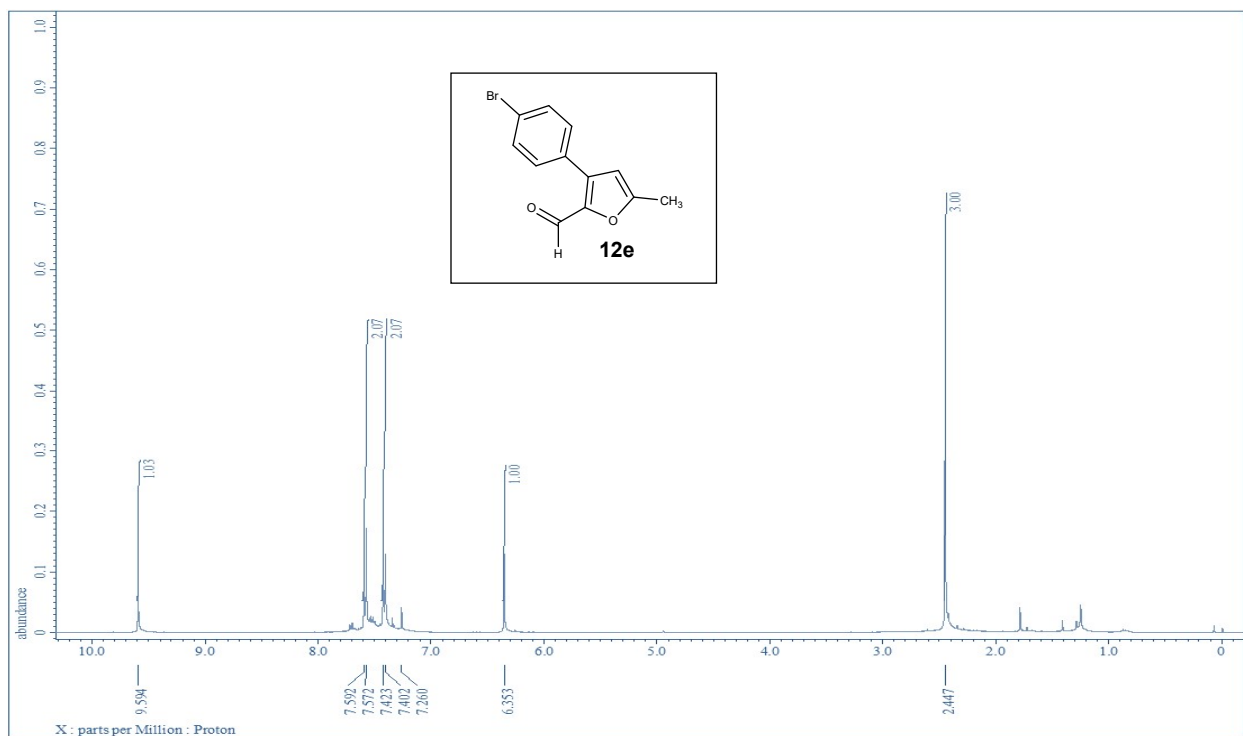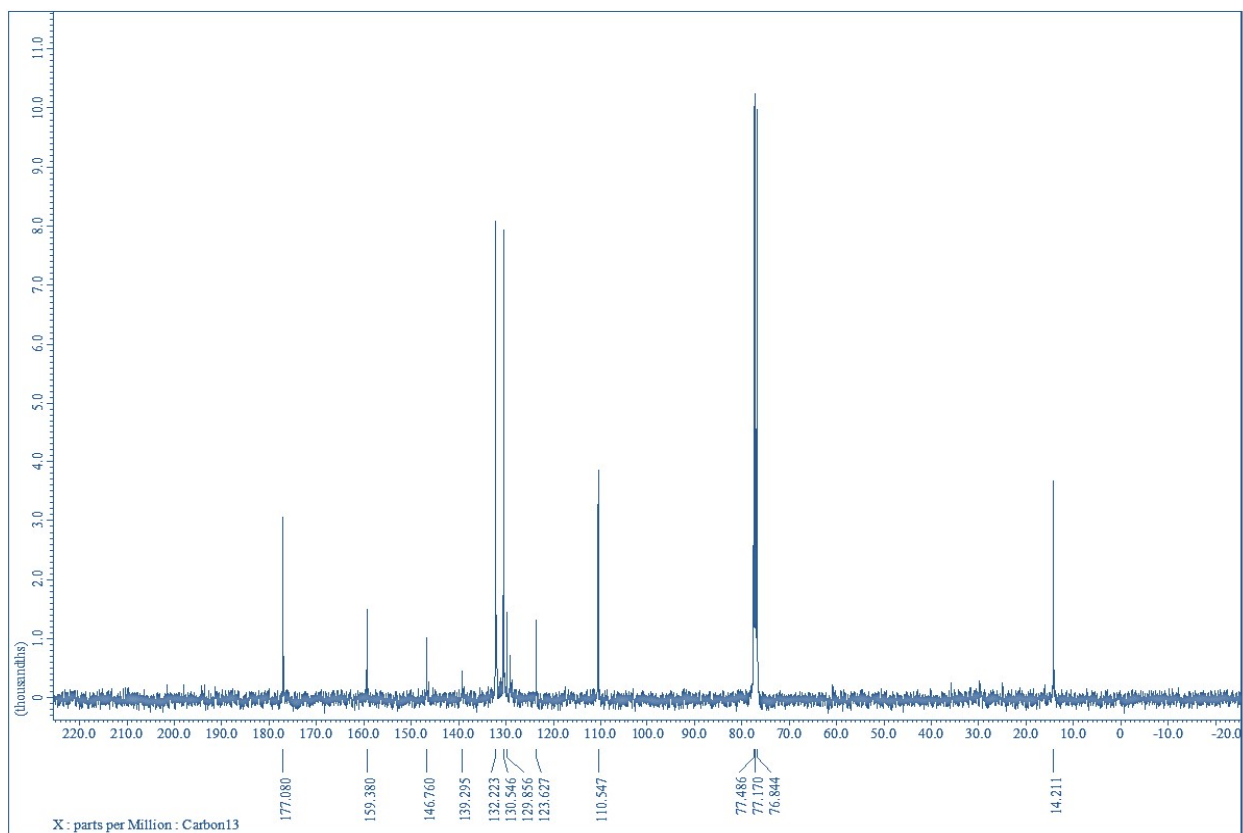

**<sup>1</sup>H NMR and <sup>13</sup>C NMR spectrum of 3-(4-bromophenyl)-5-methylfuran-2-carbaldehyde (**12e**)**

SUV-05

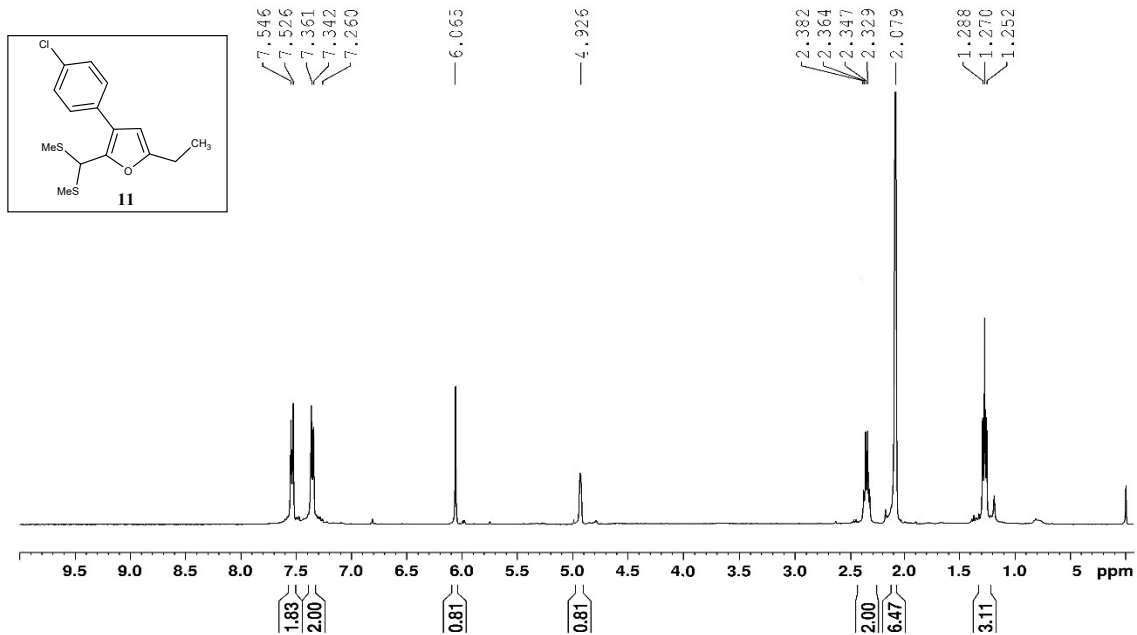

SUV-05

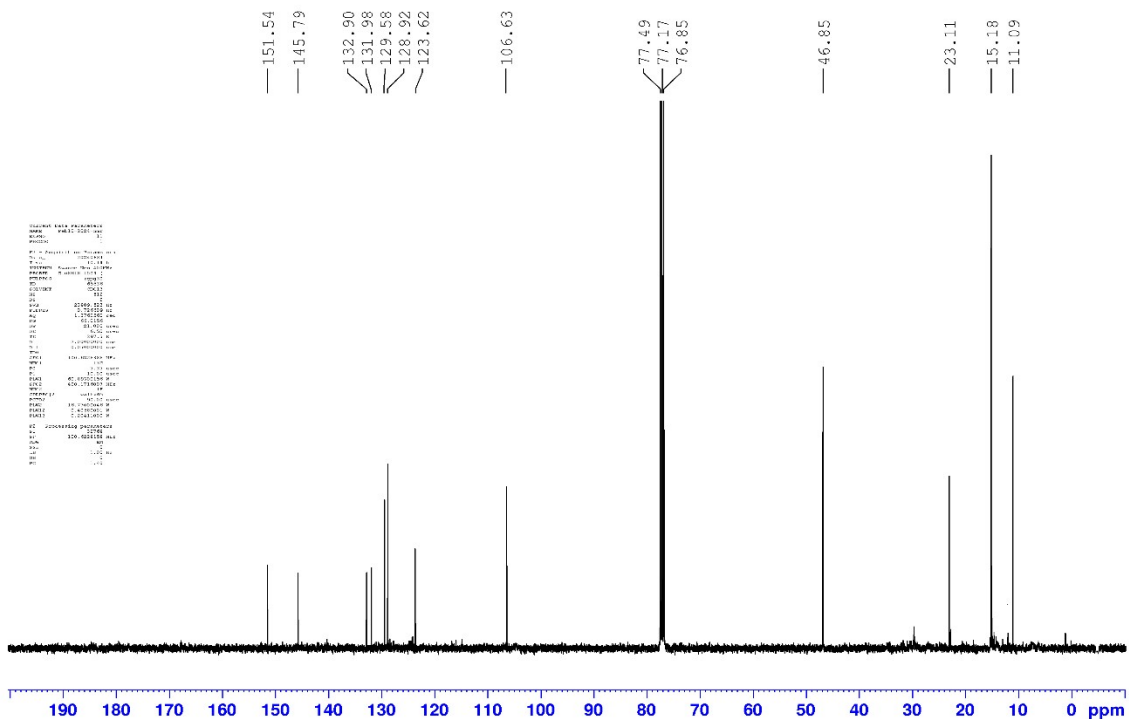

<sup>1</sup>H NMR and <sup>13</sup>C NMR spectrum of 2-(bis(methylthio)methyl)-3-(4-chlorophenyl)-5-ethylfuran (11)
